# Supplementary material for: Evaluation of the effect of fluorination on the property of monofluorinated dimyristoylphosphatidylcholines
Source: Royal Society of Chemistry journal article supplement (doi:10.1039/c4ob00934g), 2014-01-01
Supplement: c4ob00934g1.pdf [file c4ob00934g1.pdf]

Supporting Information

**Evaluation of the Effect of Fluorination on the Property of  
Monofluorinated Dimyristoylphosphatidylcholines**

Marie-Claude Gagnon,<sup>a,b</sup> Bianka Turgeon,<sup>a,b</sup> Jean-Daniel Savoie,<sup>a,b</sup> Jean-François Parent,<sup>a,b</sup>

Michèle Auger<sup>b,\*</sup> and Jean-François Paquin<sup>a,\*</sup>

<sup>a</sup>Canada Research Chair in Organic and Medicinal Chemistry, PROTEO, Département de chimie,

Université Laval, 1045 avenue de la Médecine, Québec, QC, Canada G1V 0A6

<sup>b</sup>PROTEO, CERMA, Département de chimie, Université Laval, 1045 avenue de la Médecine,

Québec, QC, Canada G1V 0A6

*michele.auger@chm.ulaval.ca*

*jean-francois.paquin@chm.ulaval.ca*

---

**Table of contents**

|                                                                                      |                |
|--------------------------------------------------------------------------------------|----------------|
| NMR spectra ( <sup>1</sup> H, <sup>13</sup> C, <sup>31</sup> P, and <sup>19</sup> F) | SI-2 to SI-55  |
| Fourier-transformed Infrared                                                         |                |
| Sample preparation                                                                   | SI-56          |
| Experiments                                                                          | SI-56 to SI-57 |

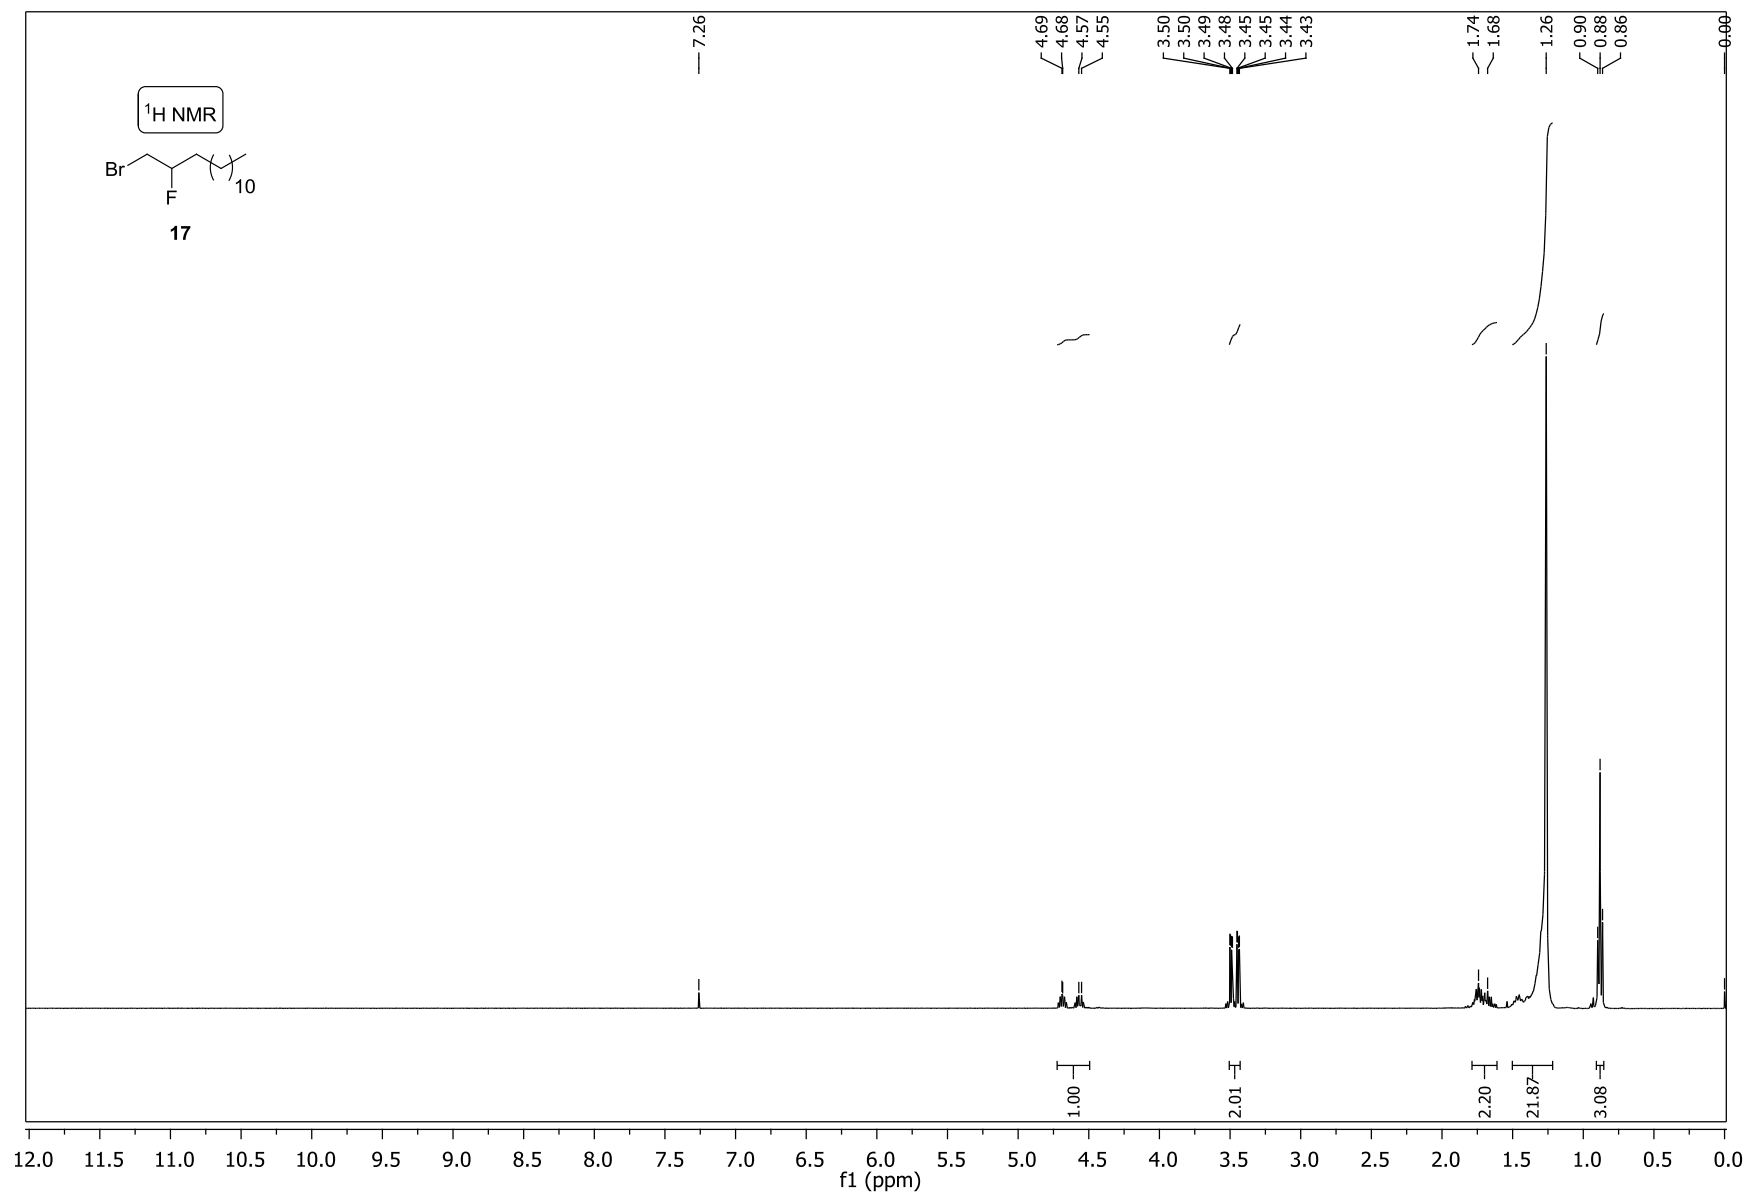

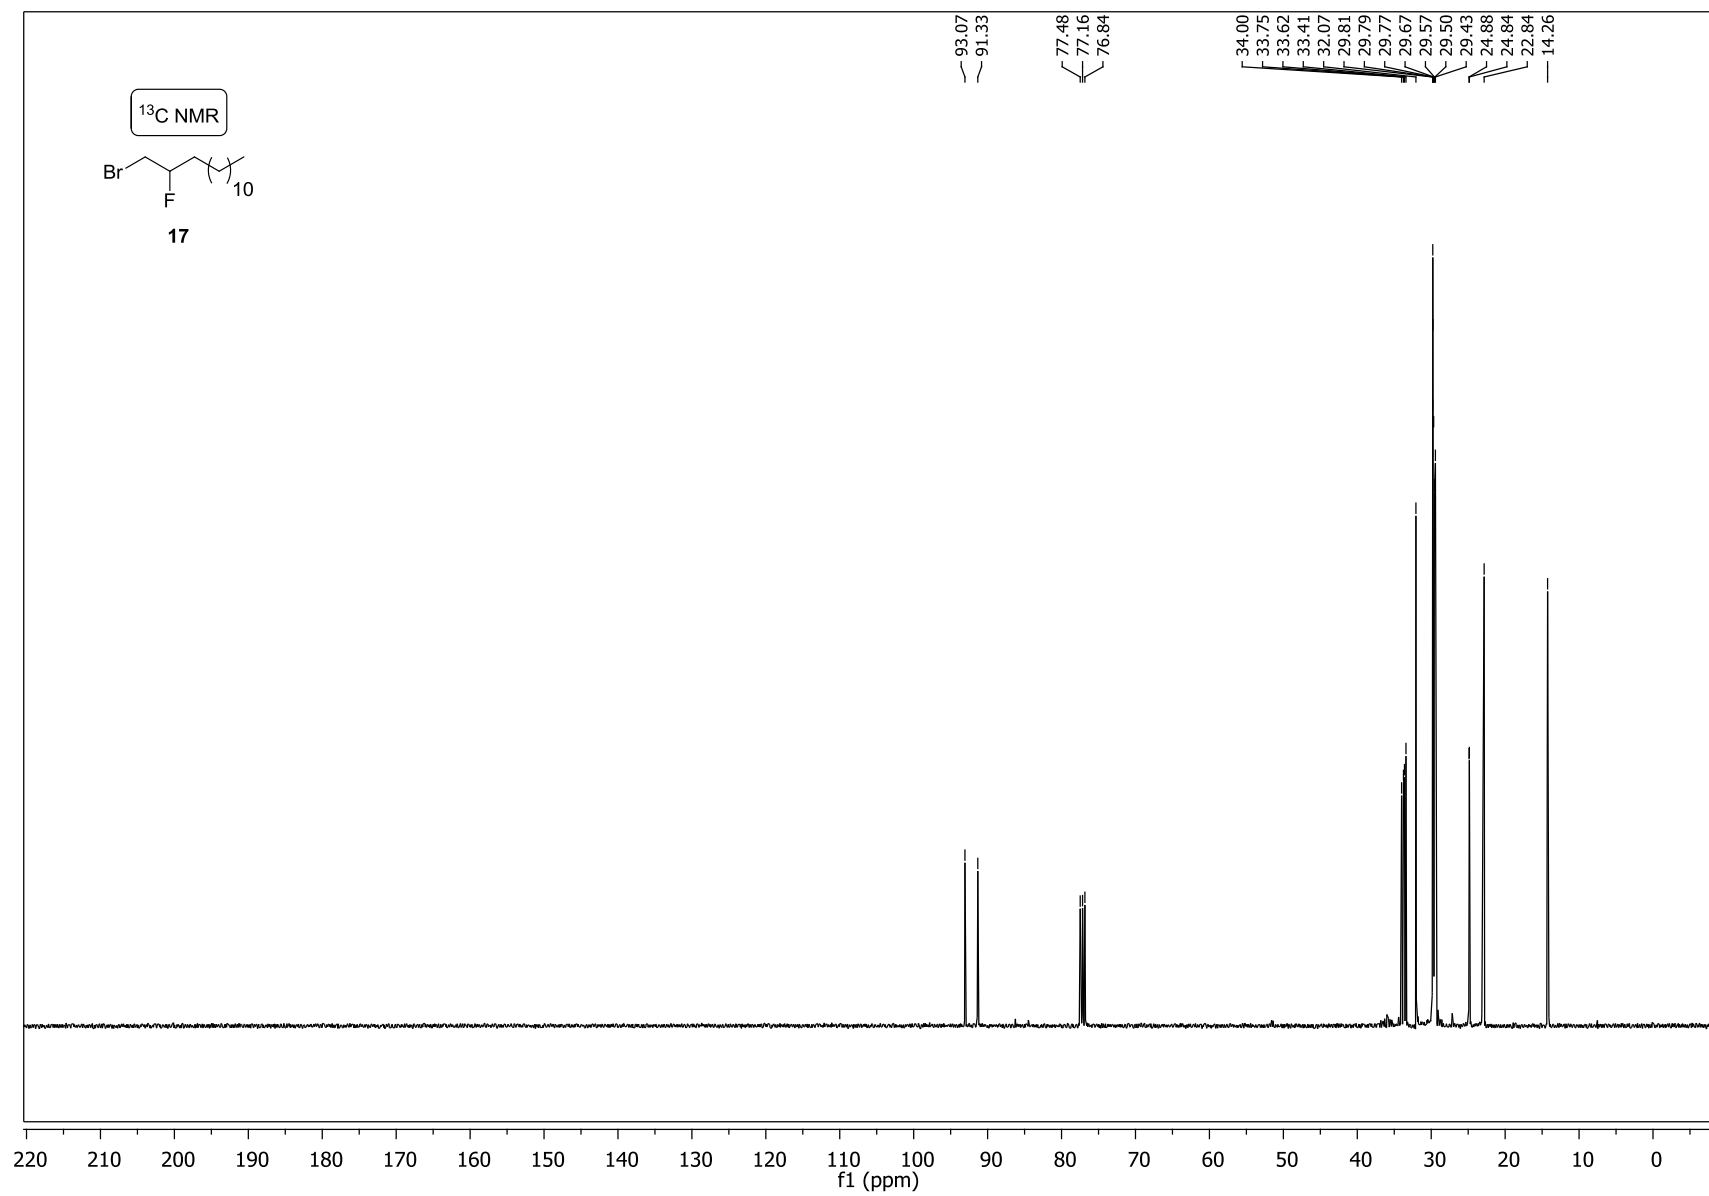

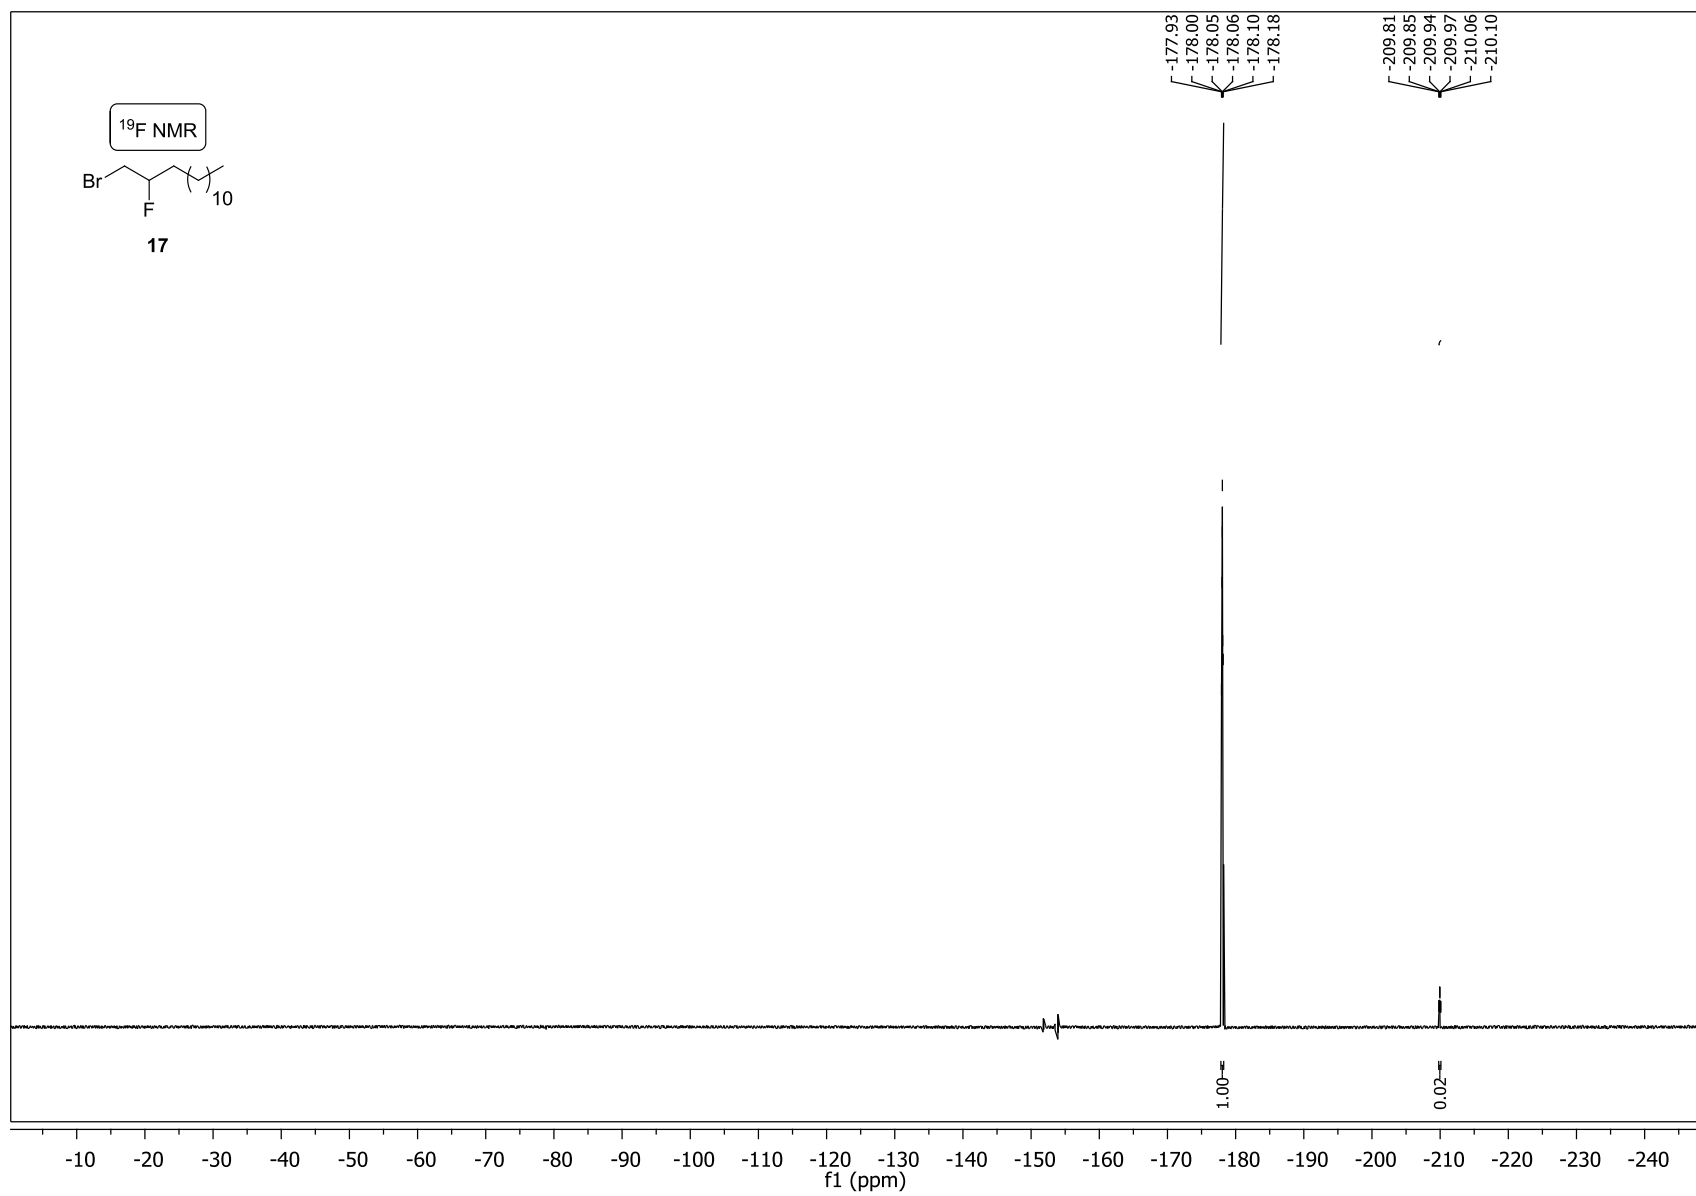

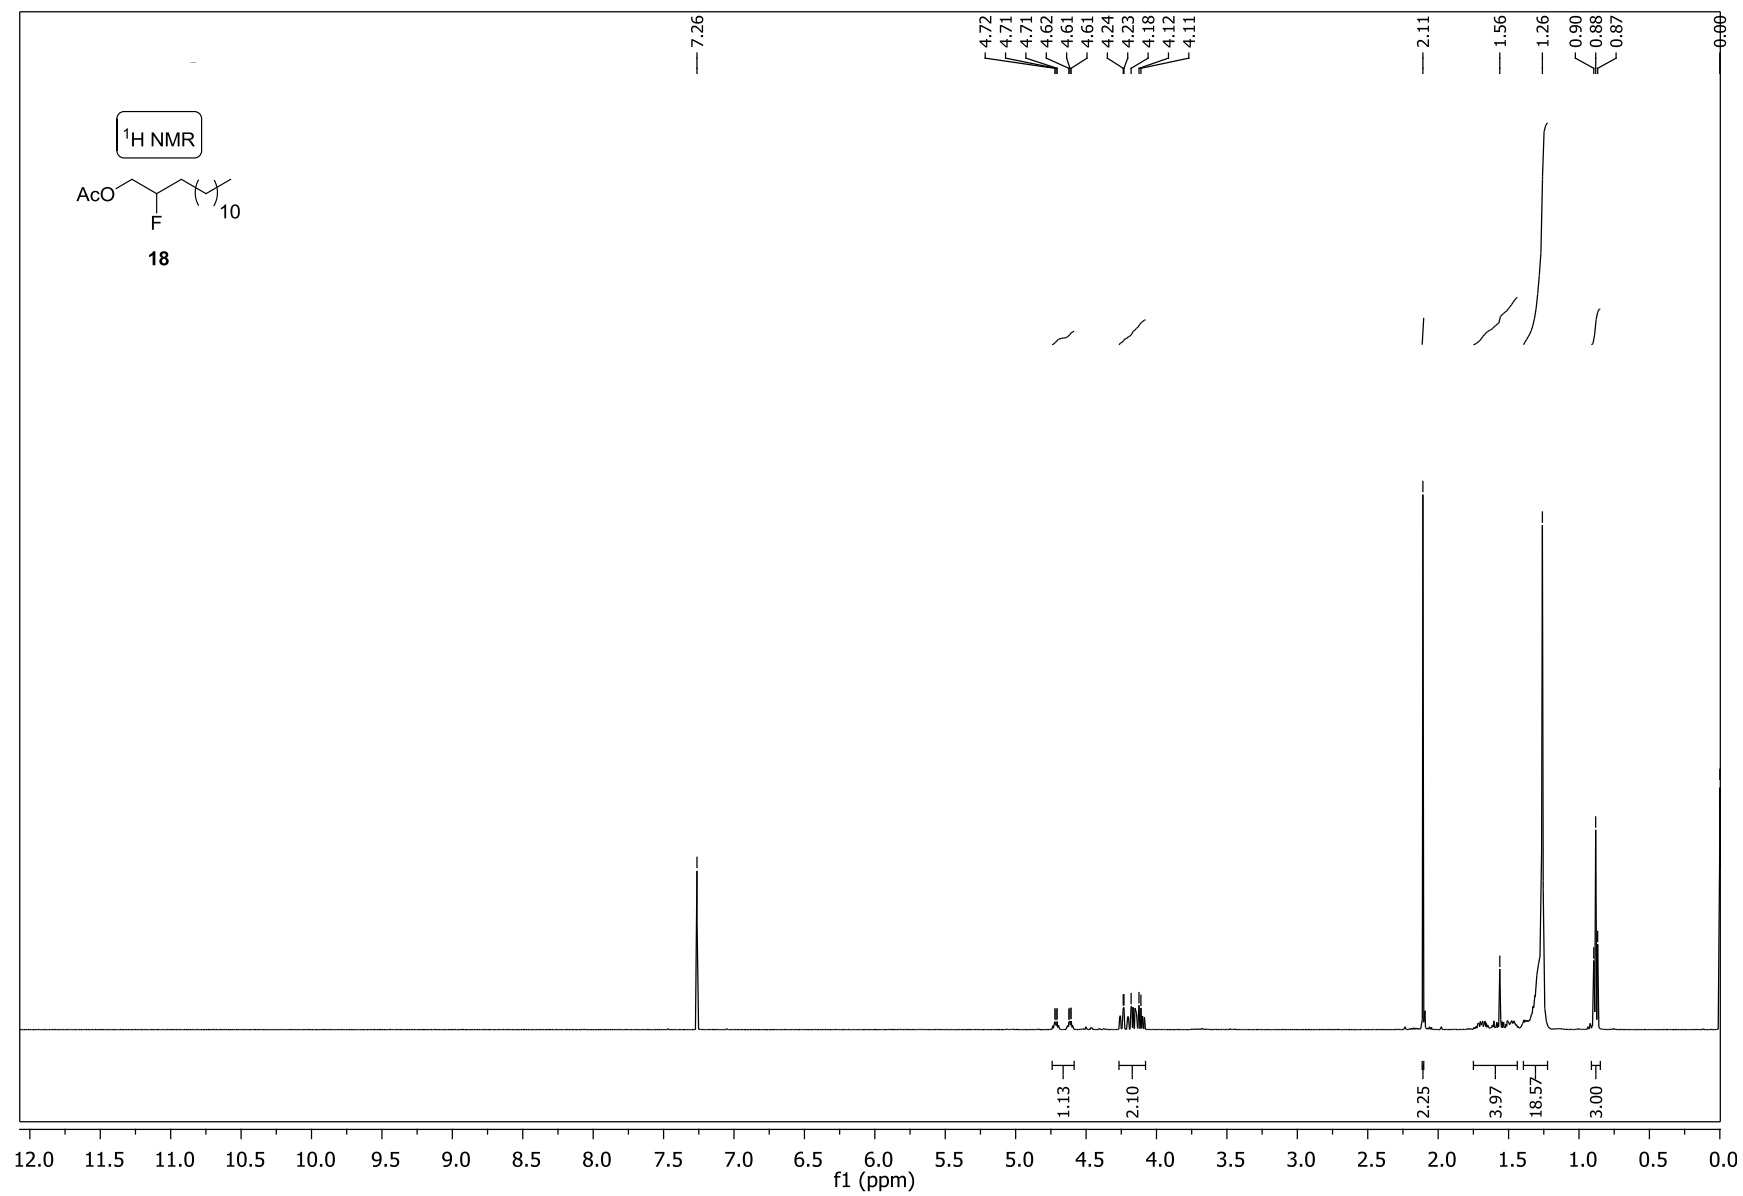

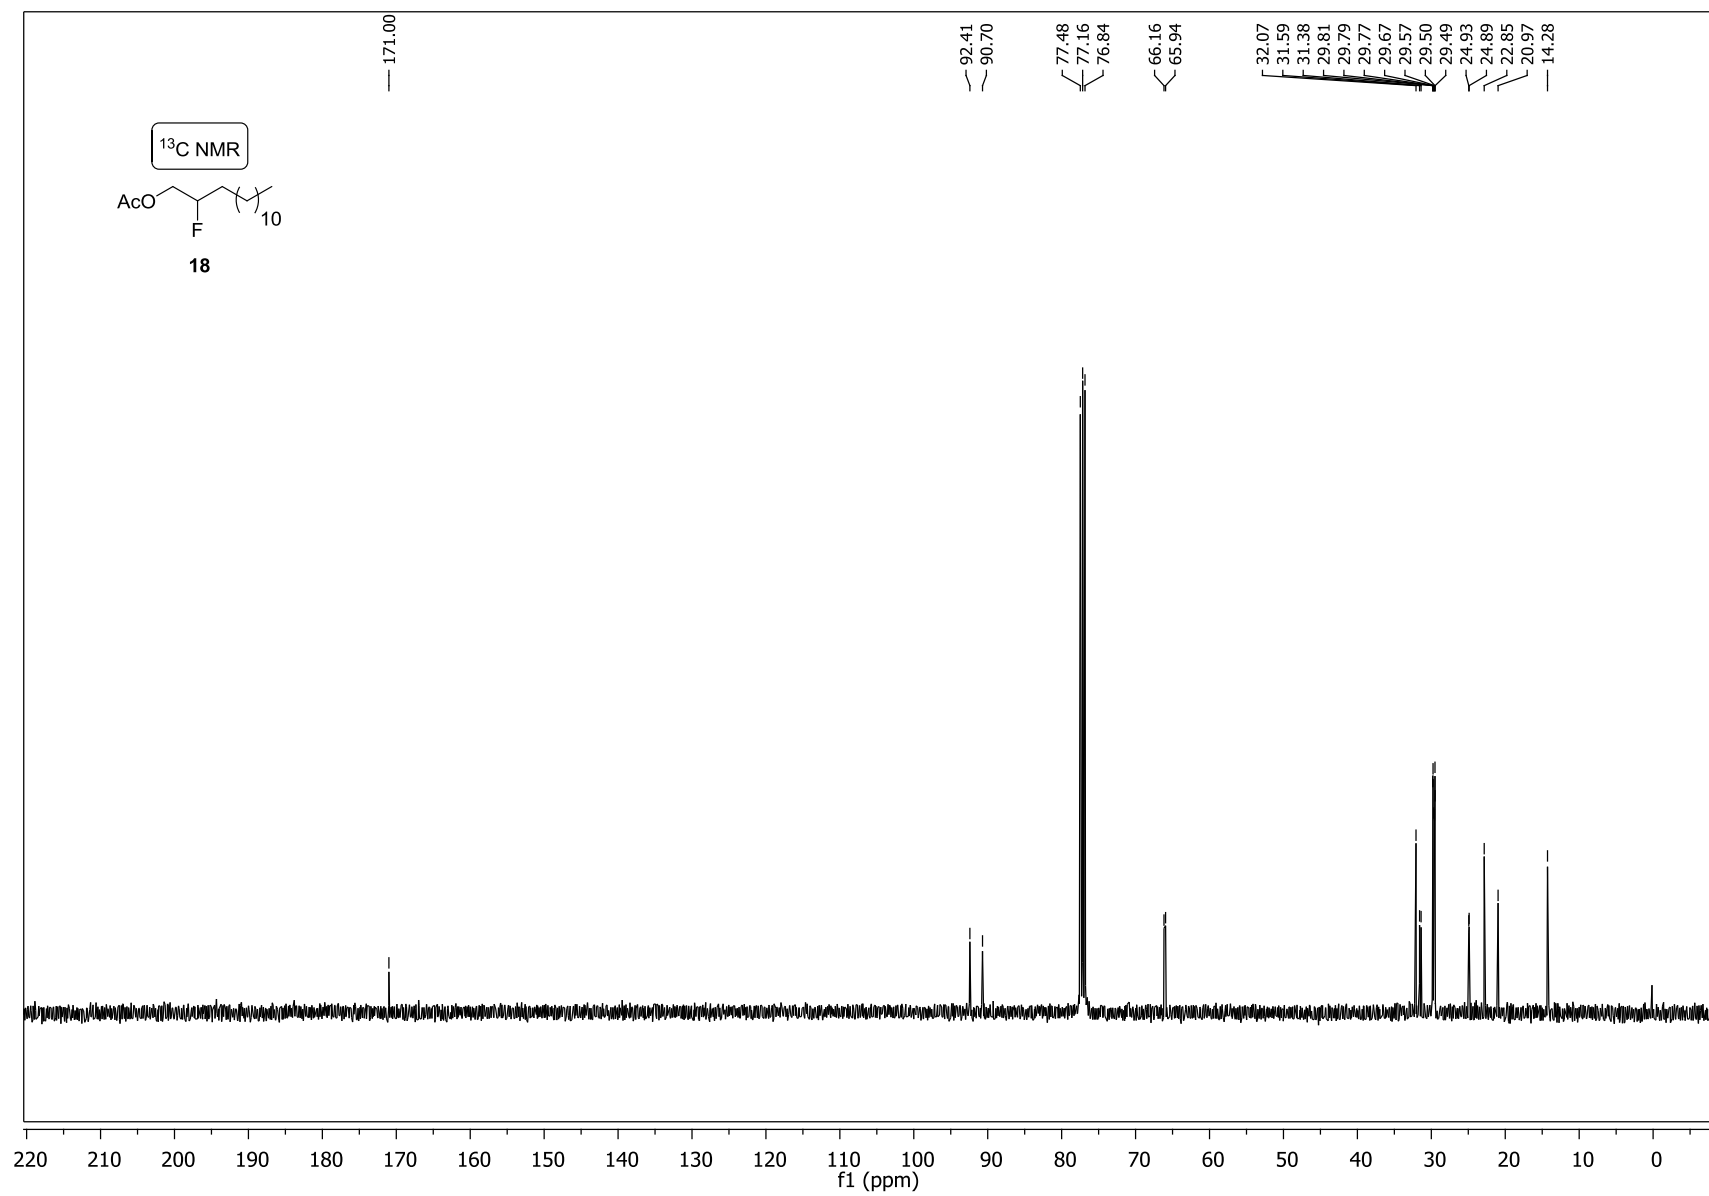

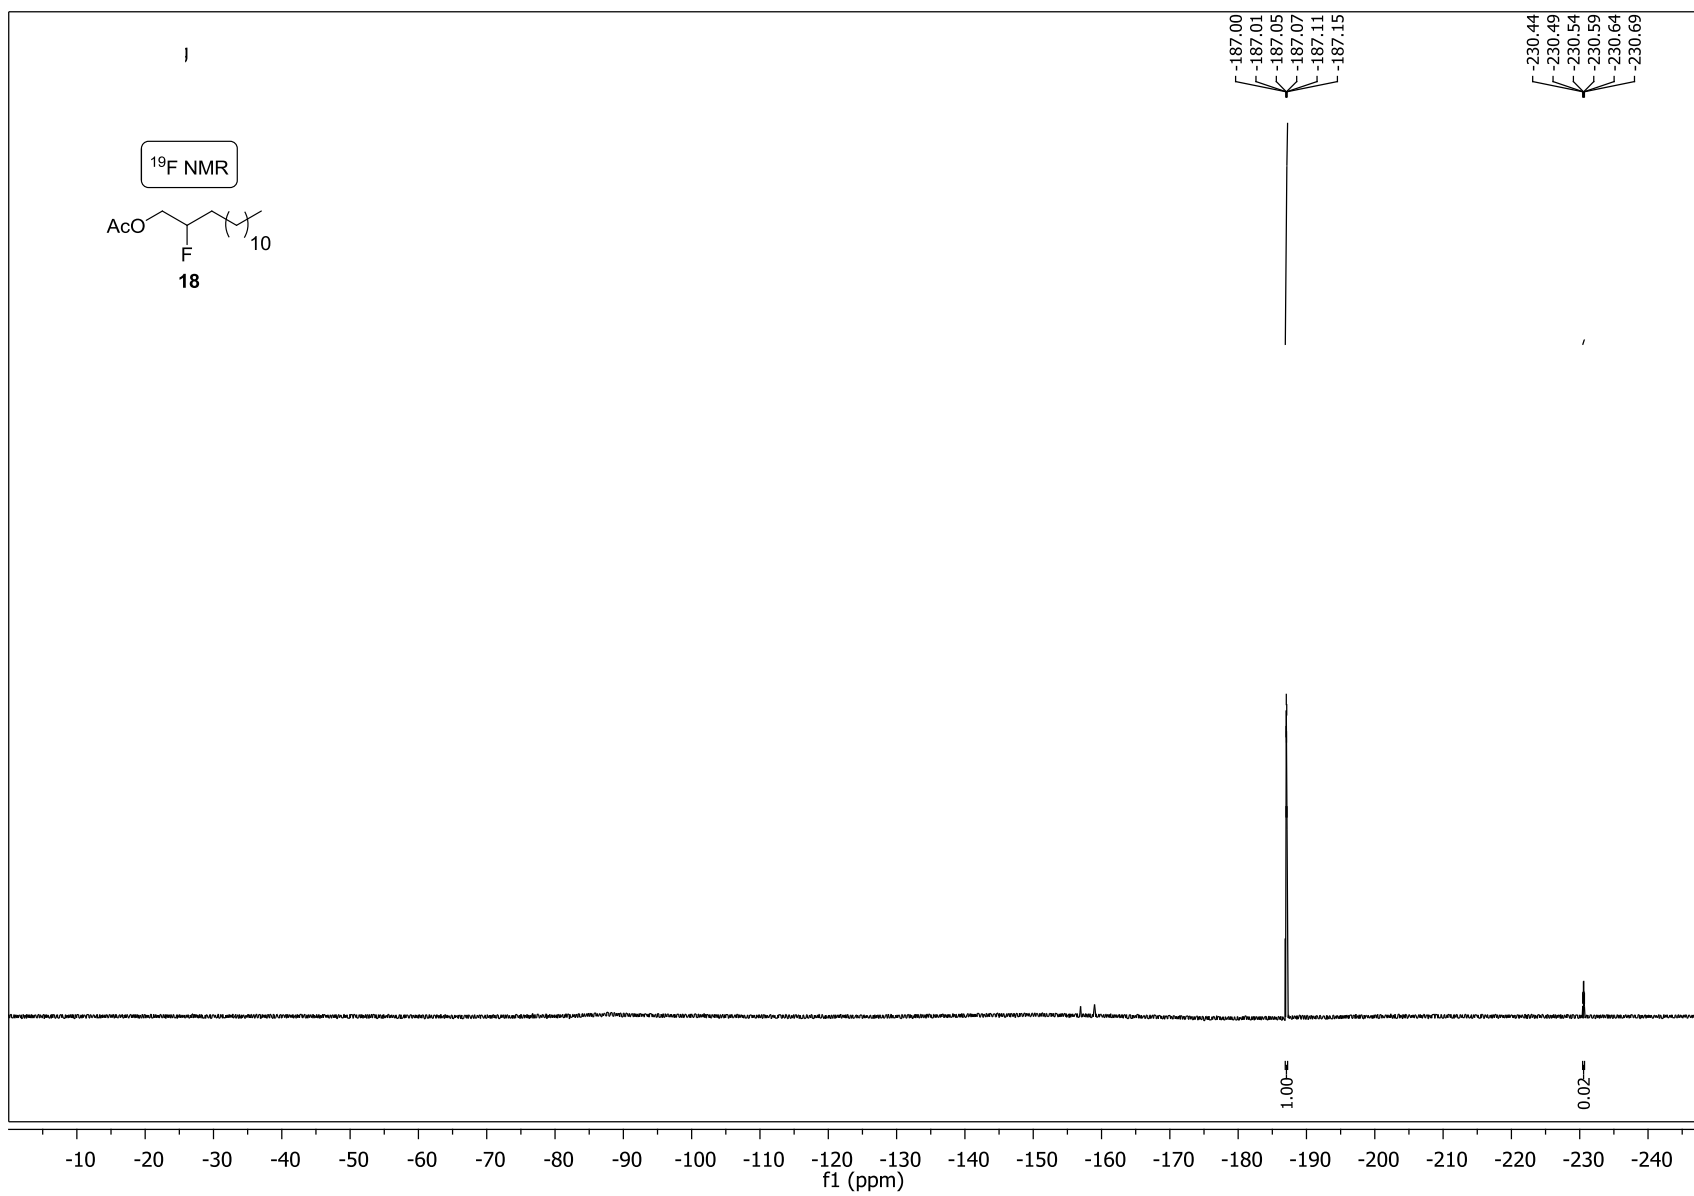

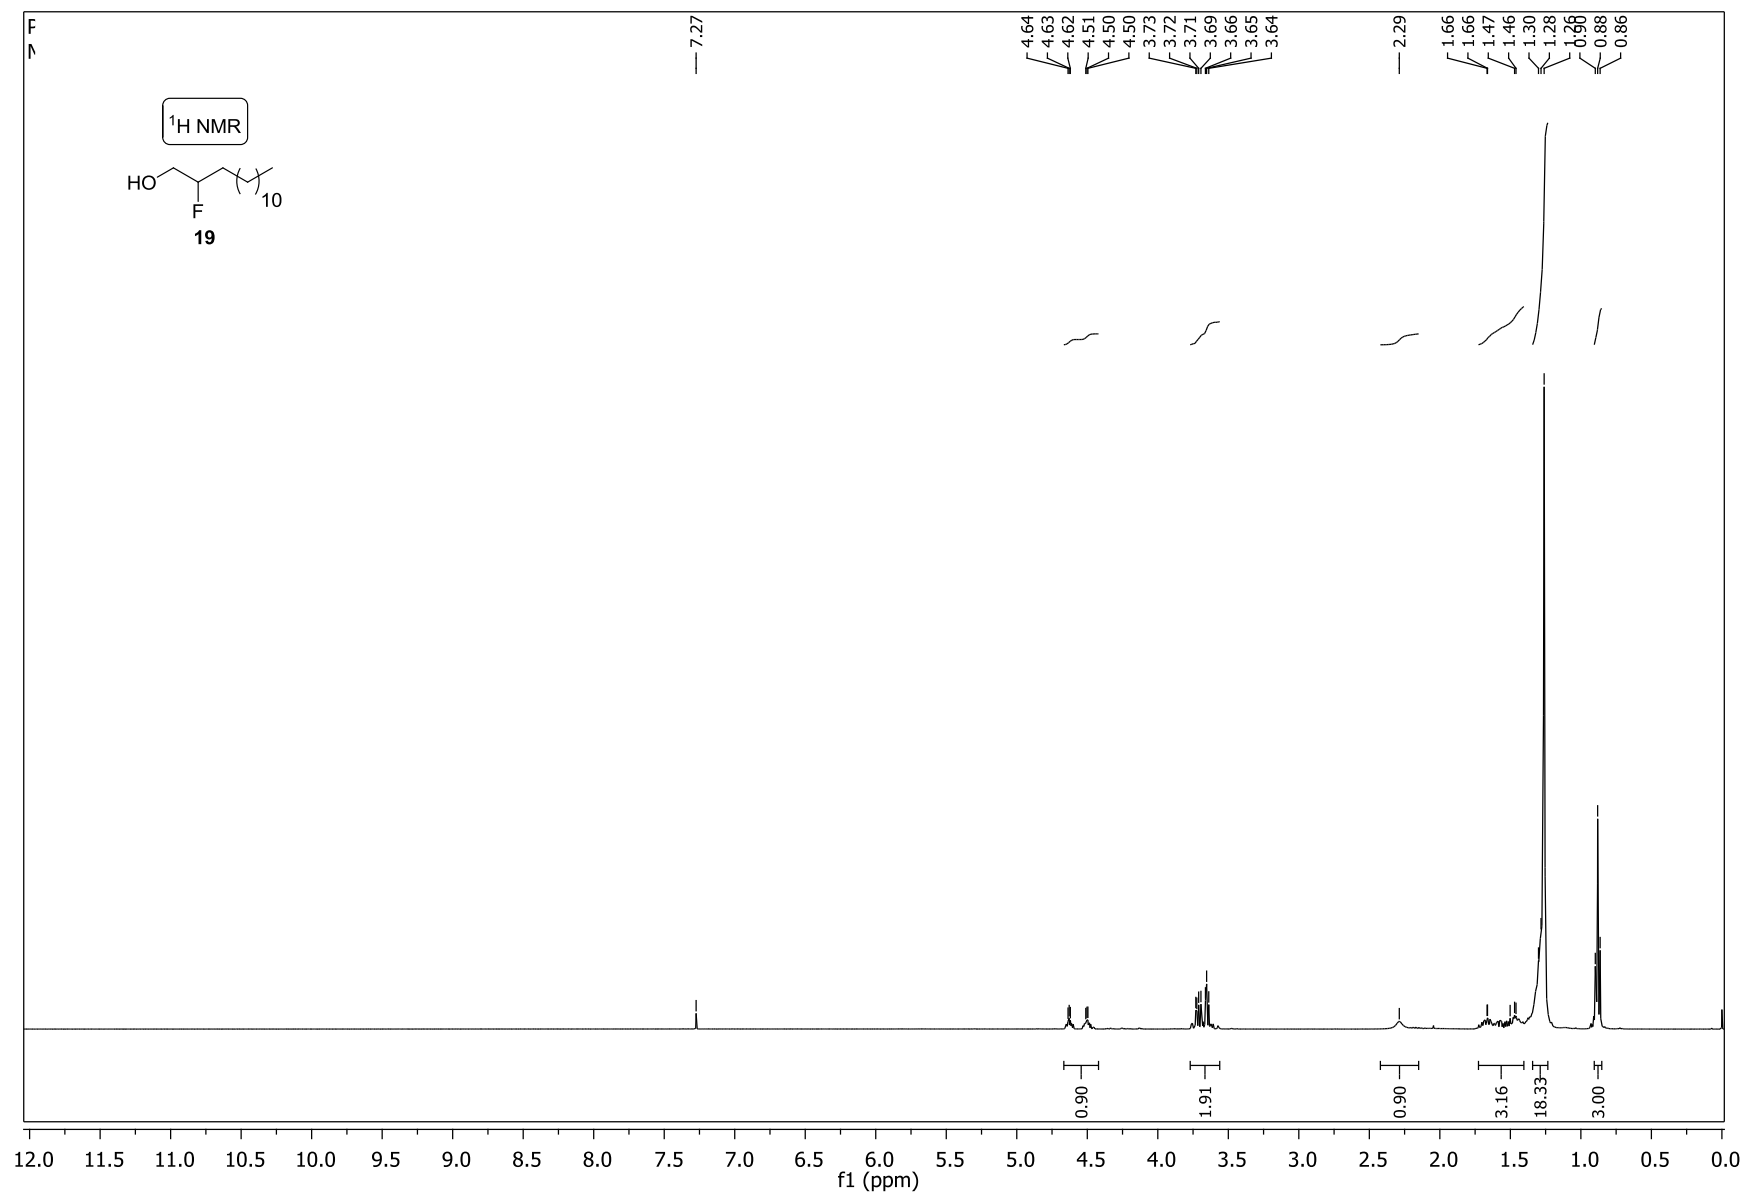



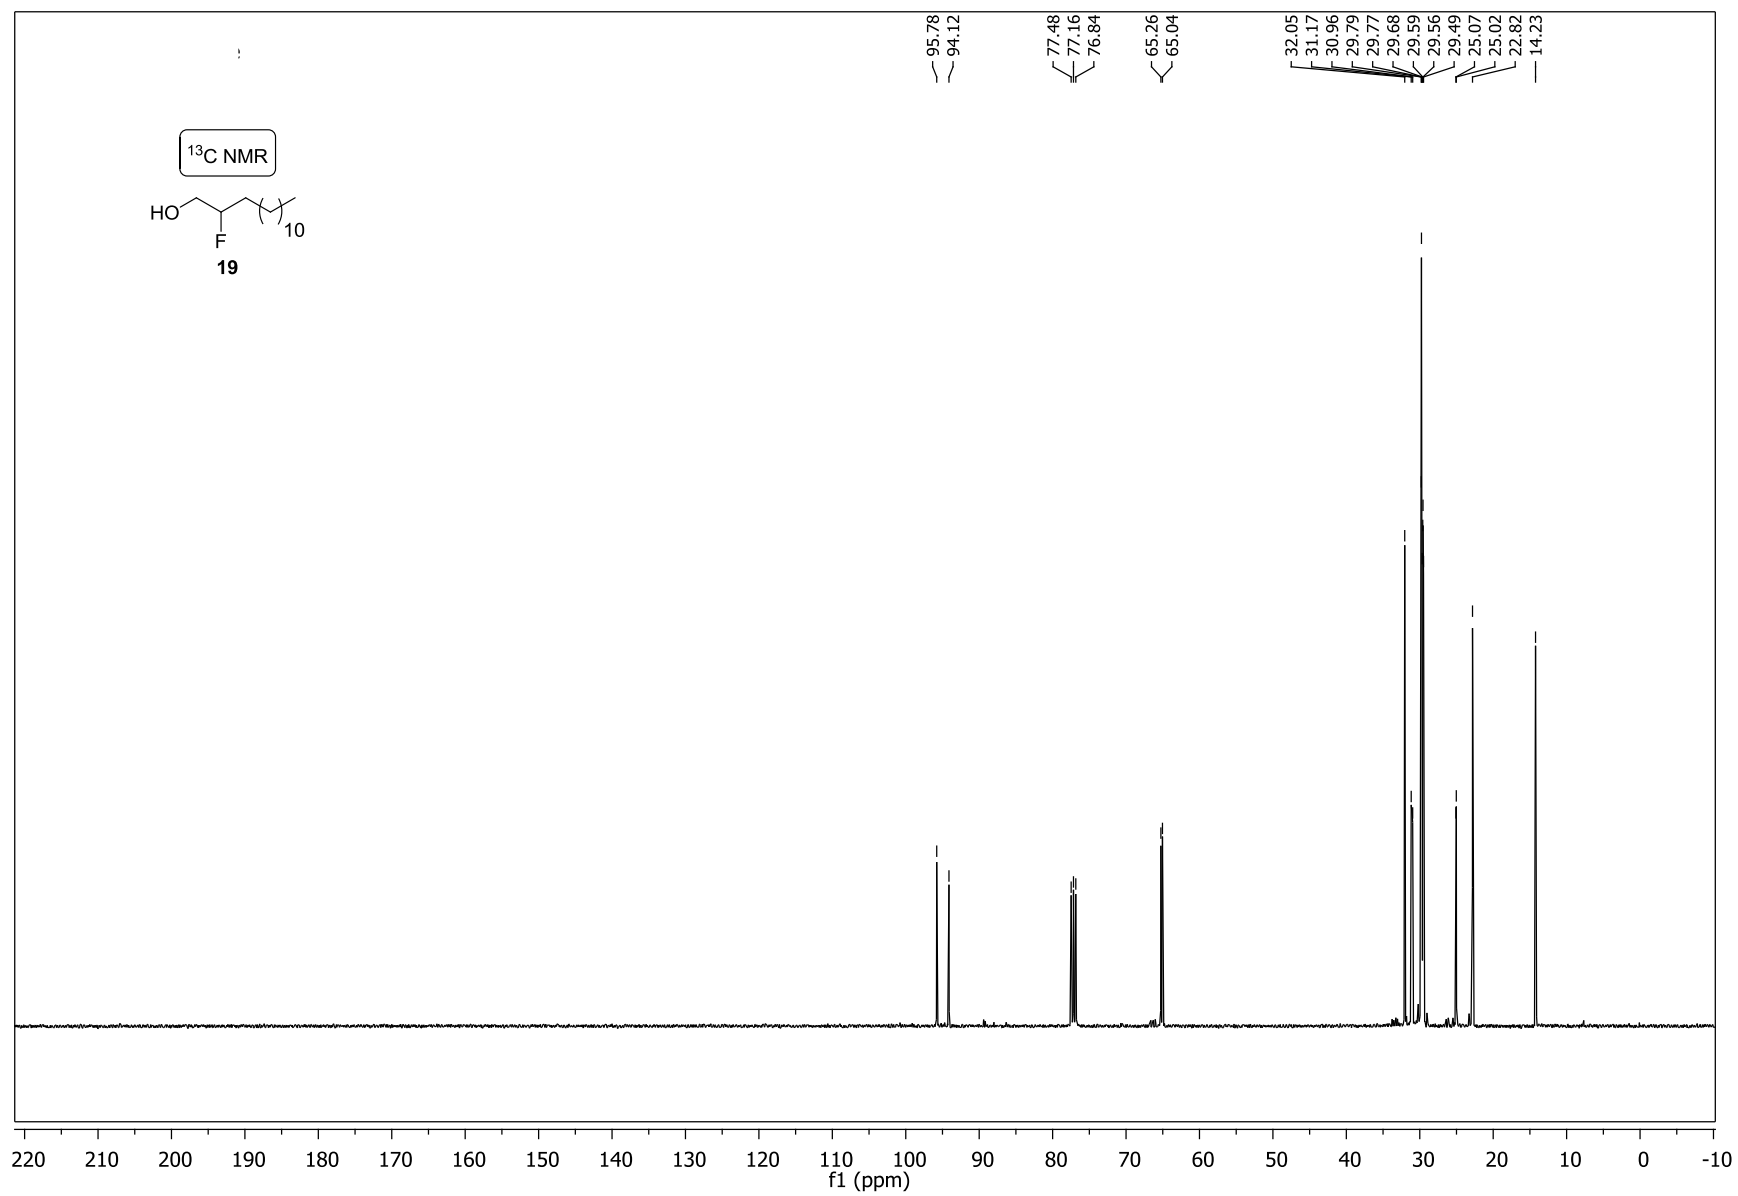

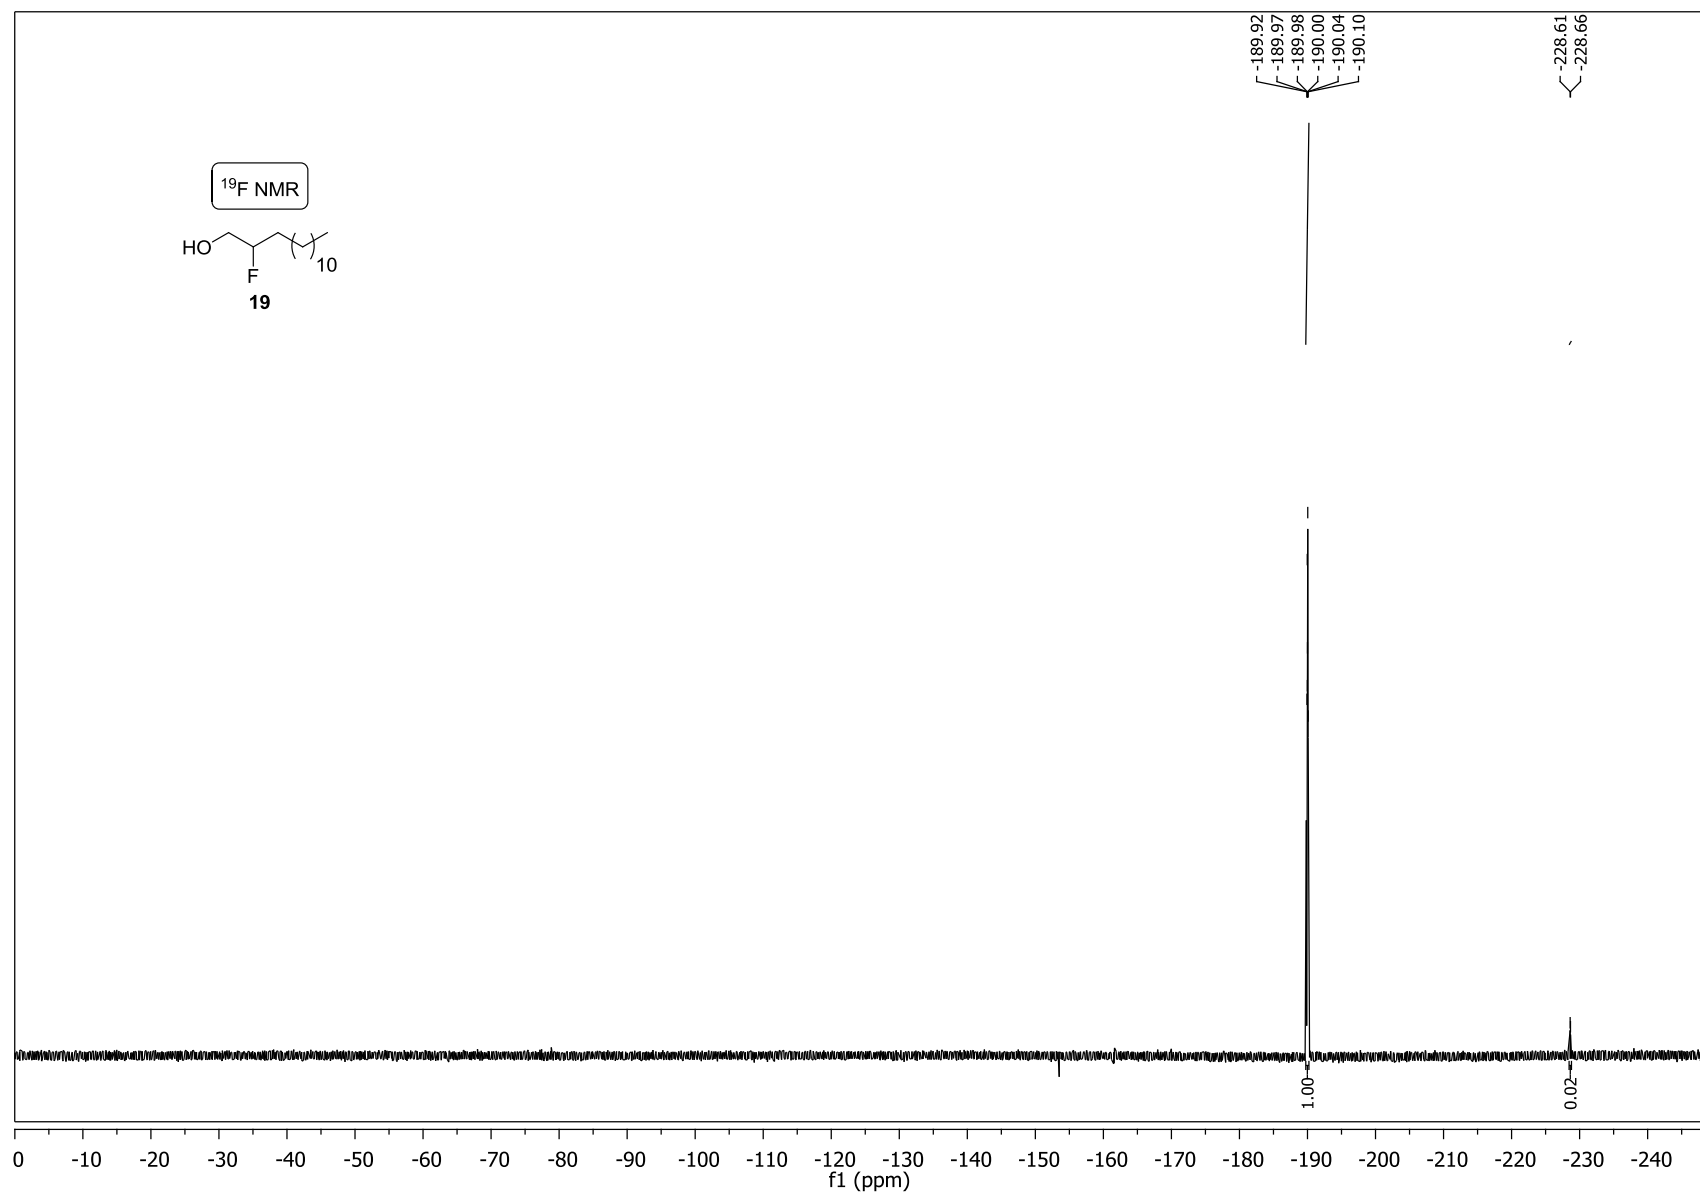

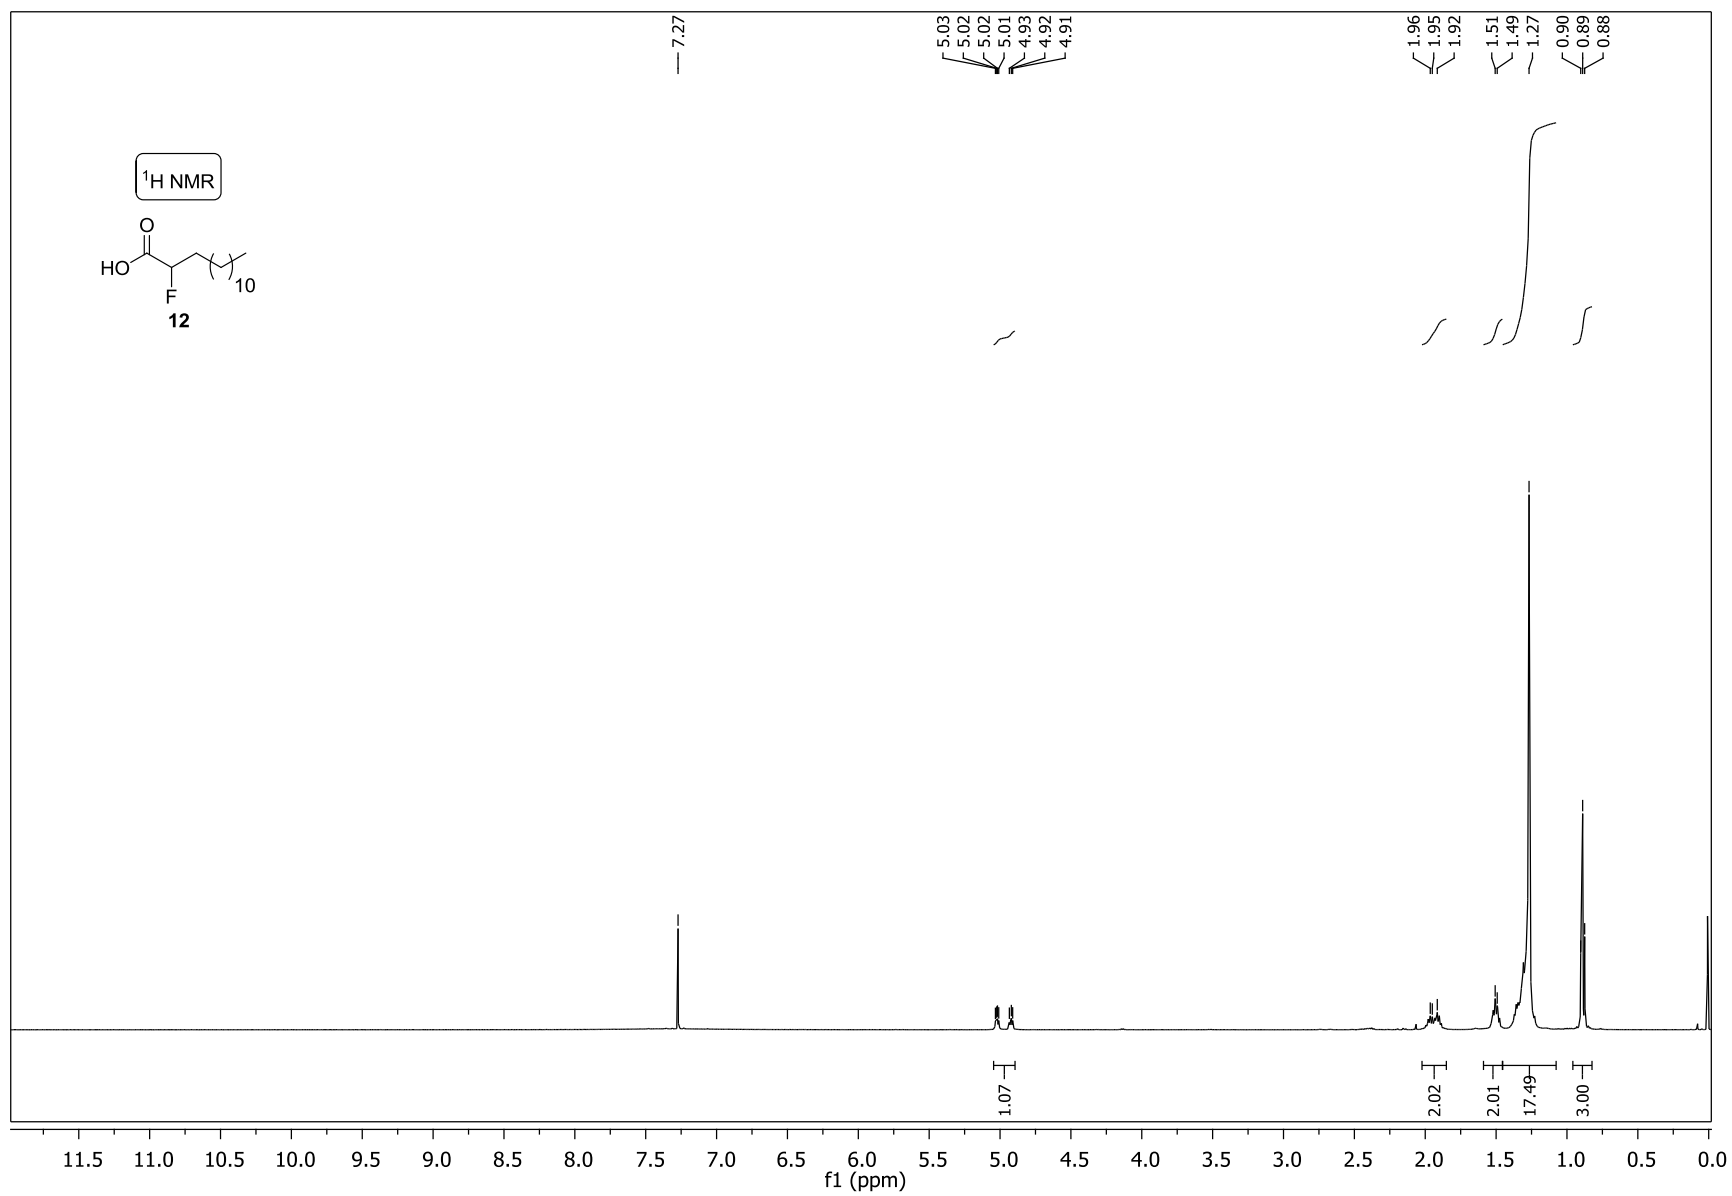

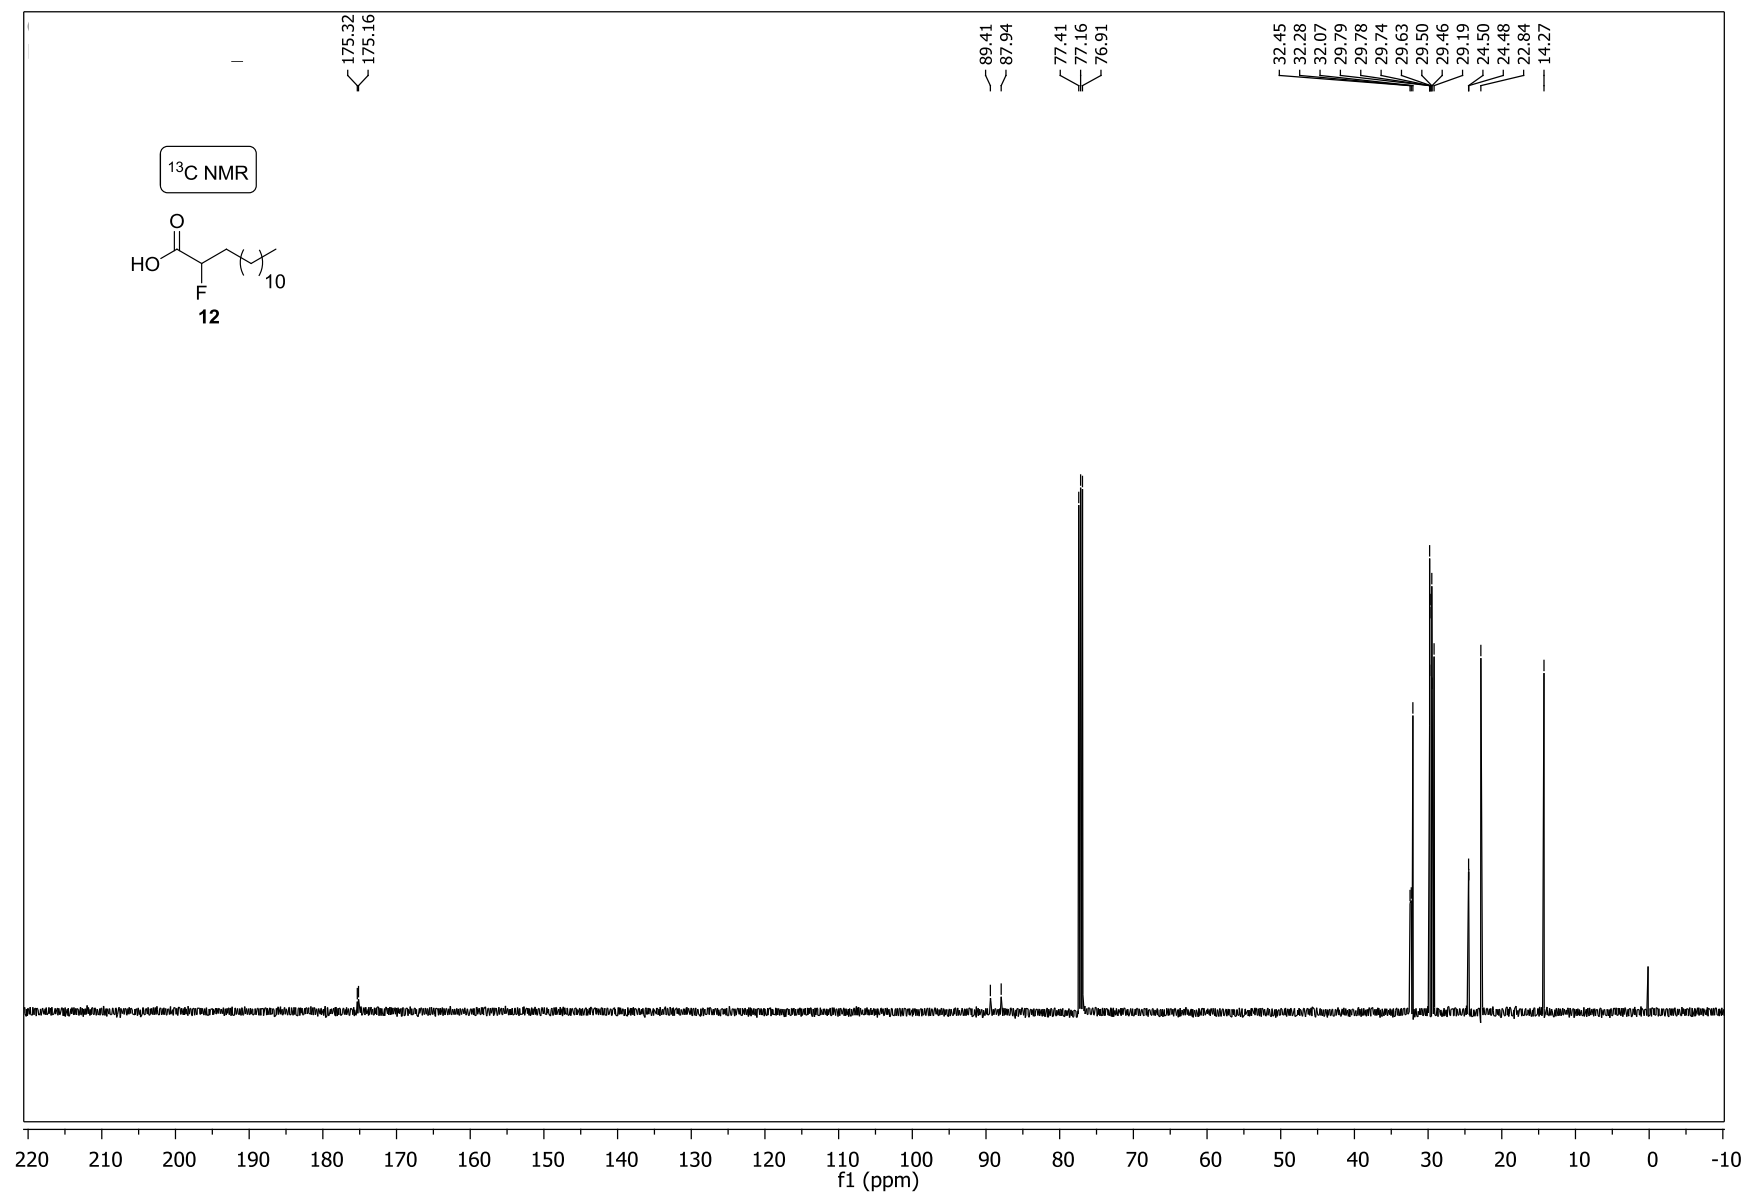

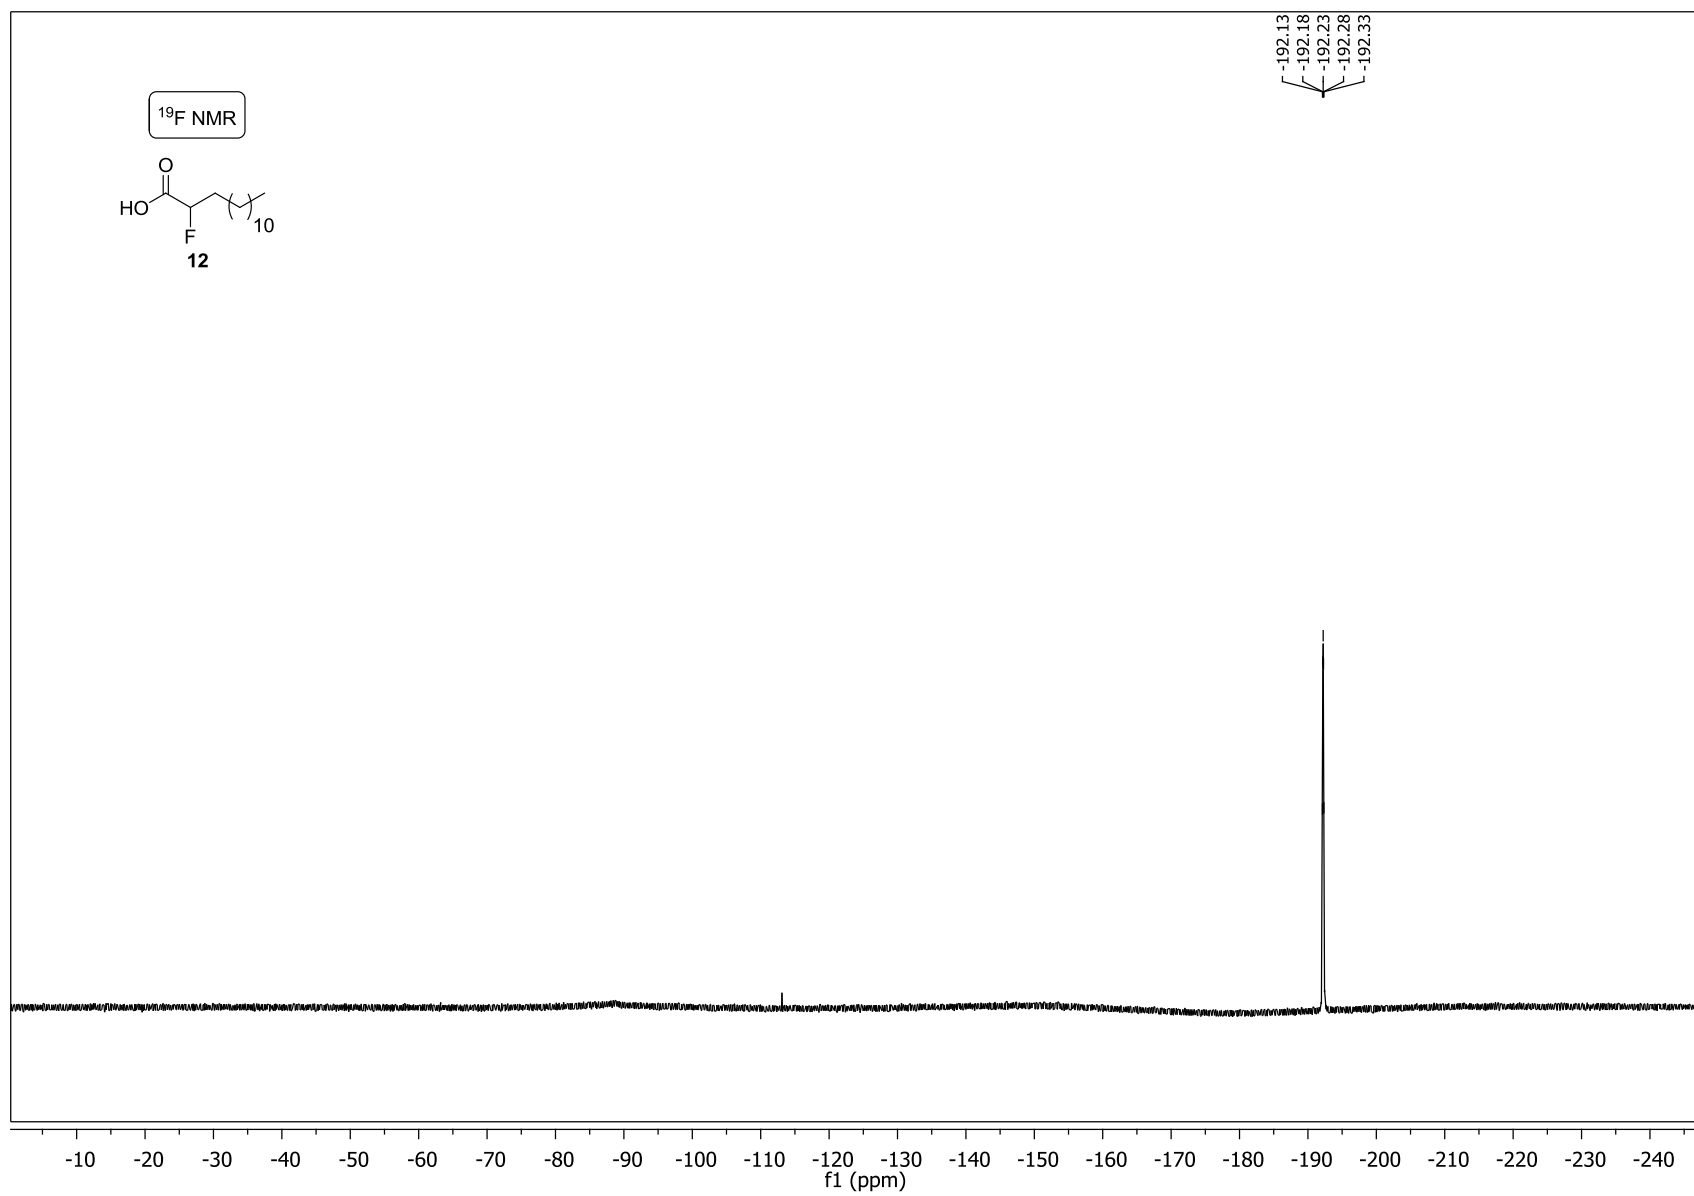

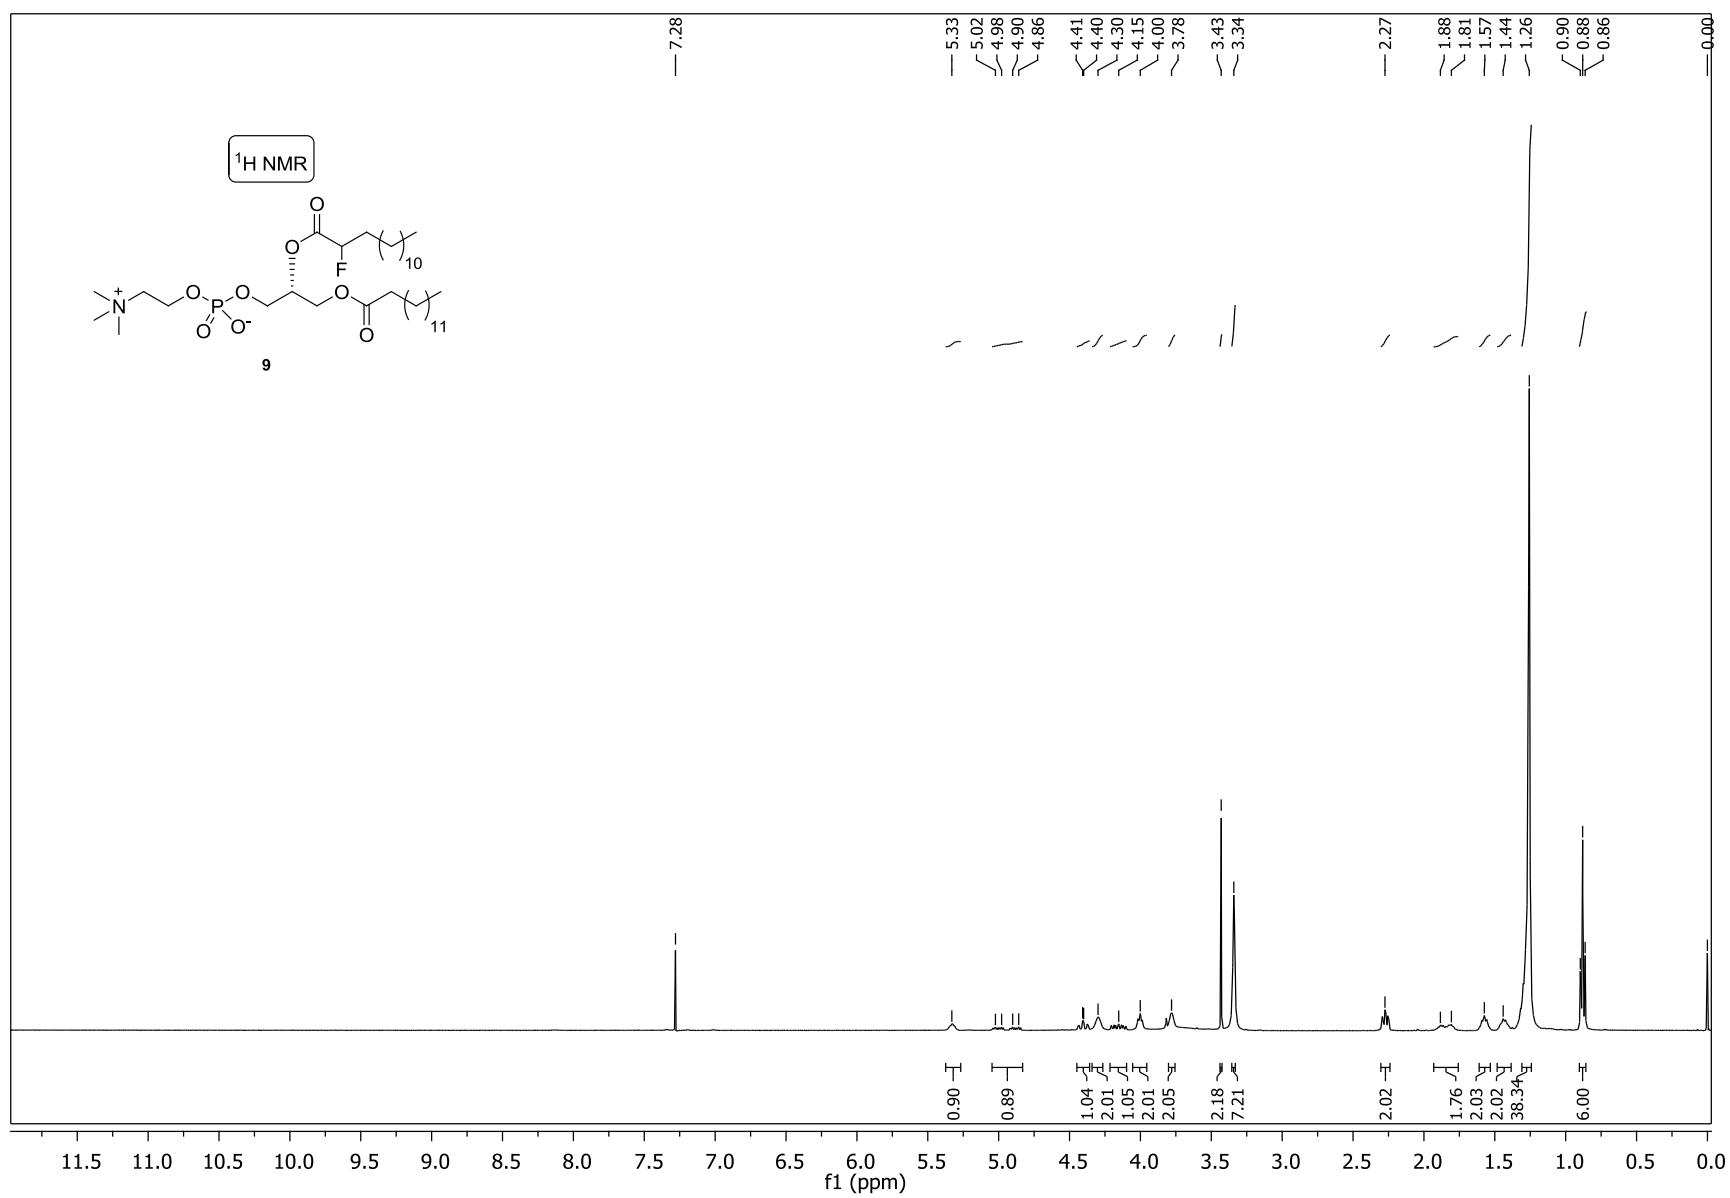

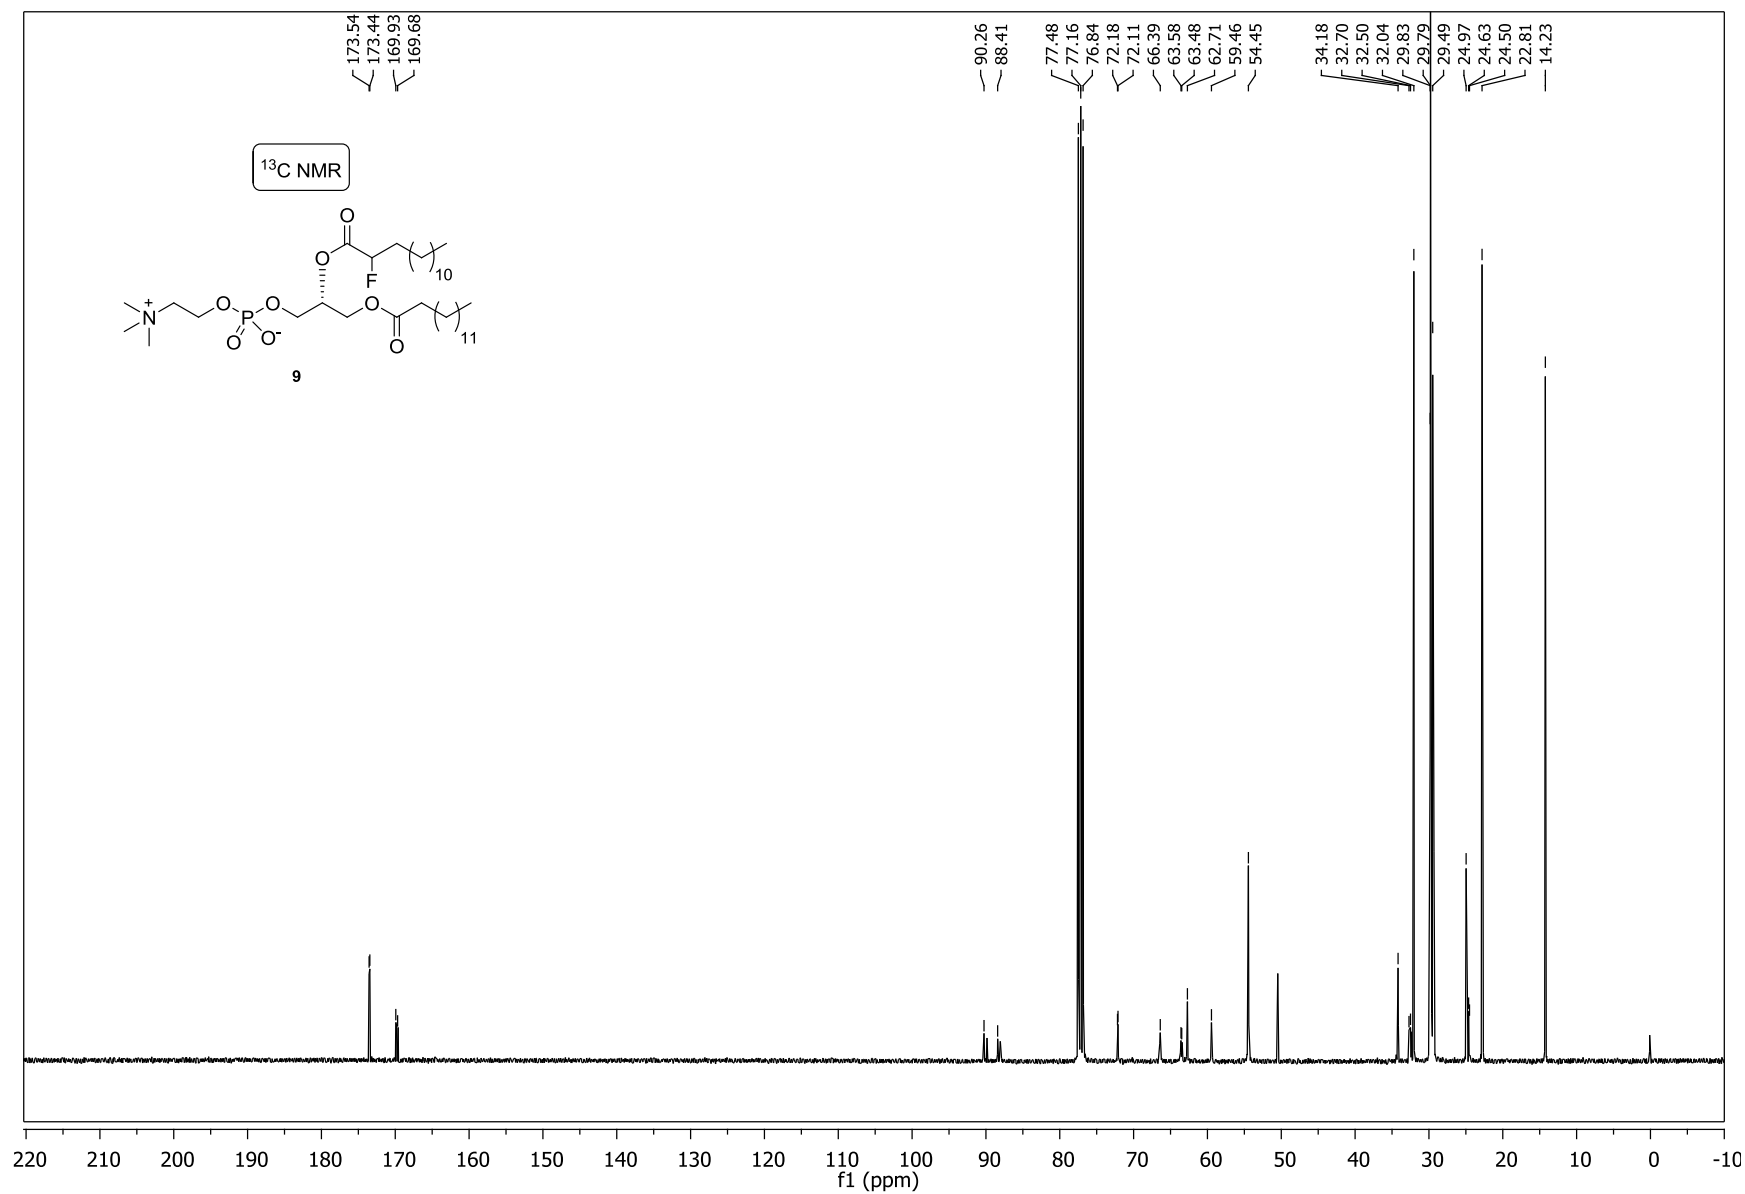

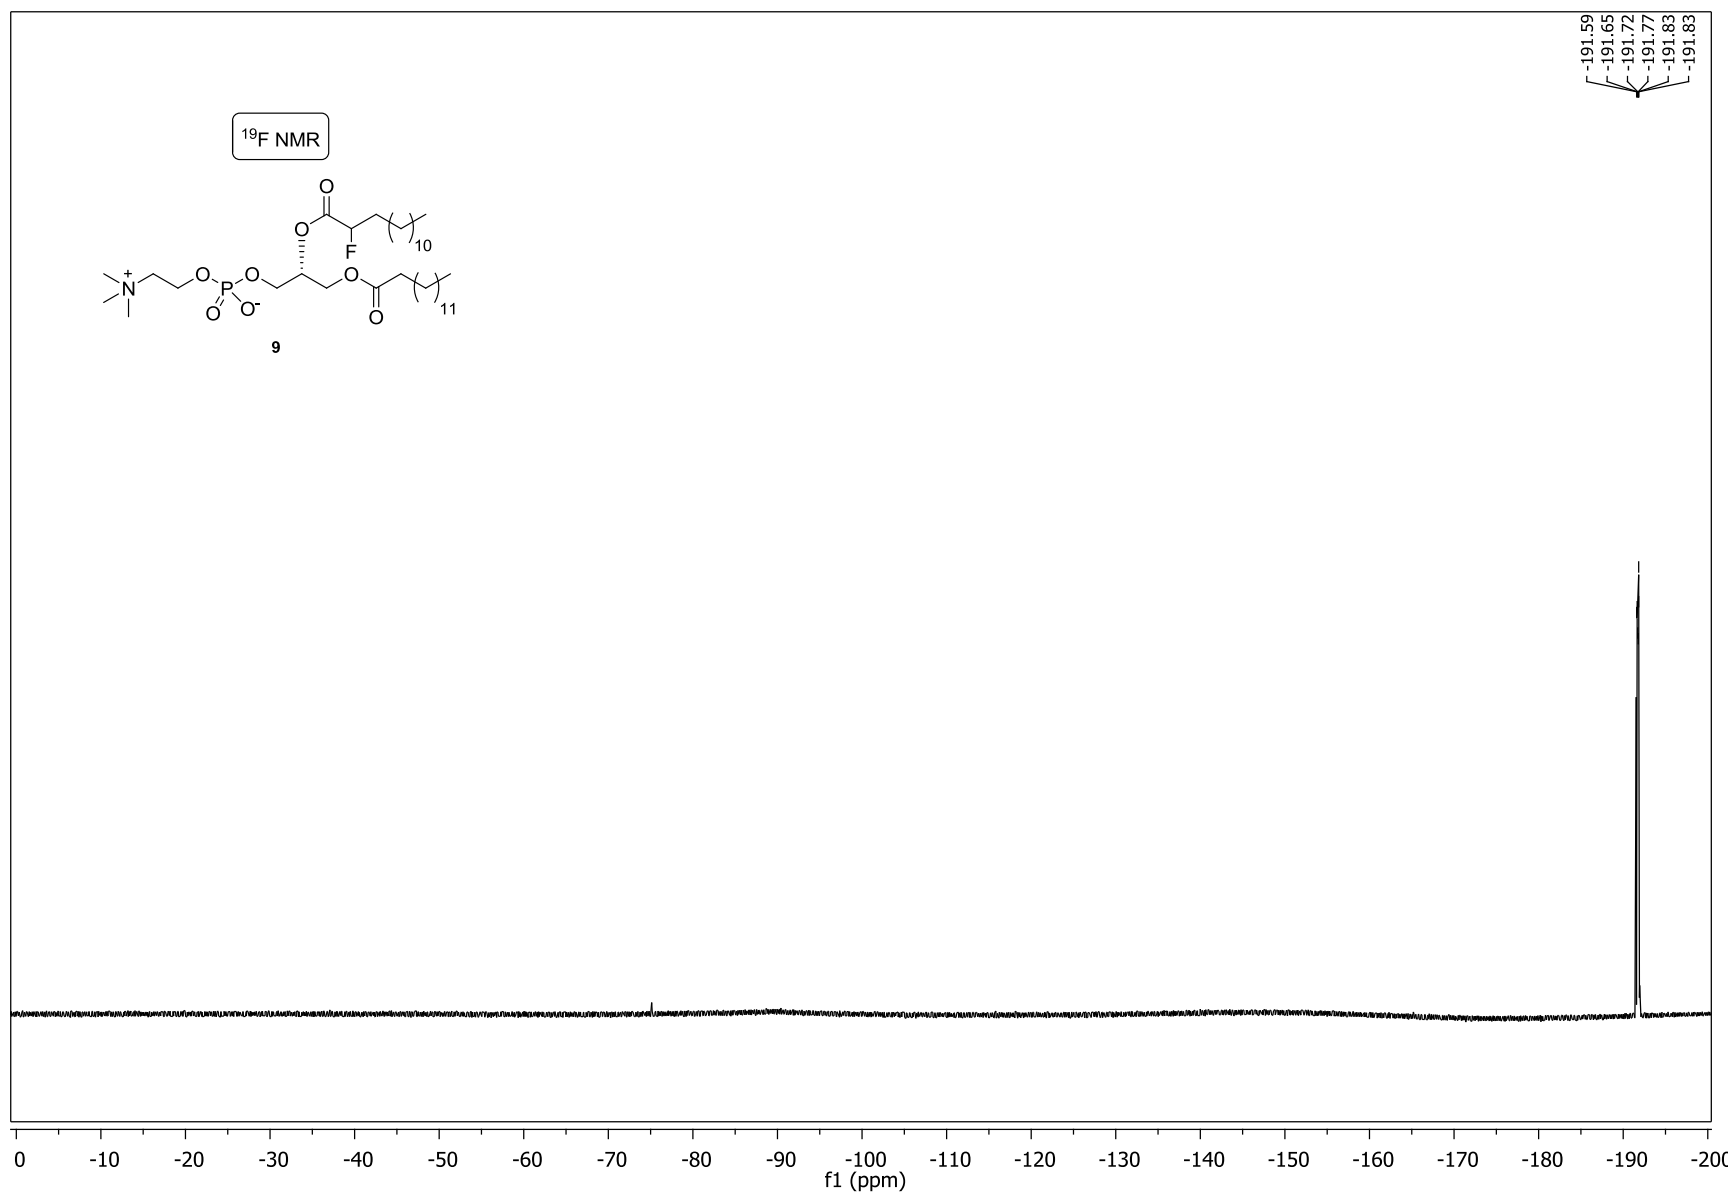



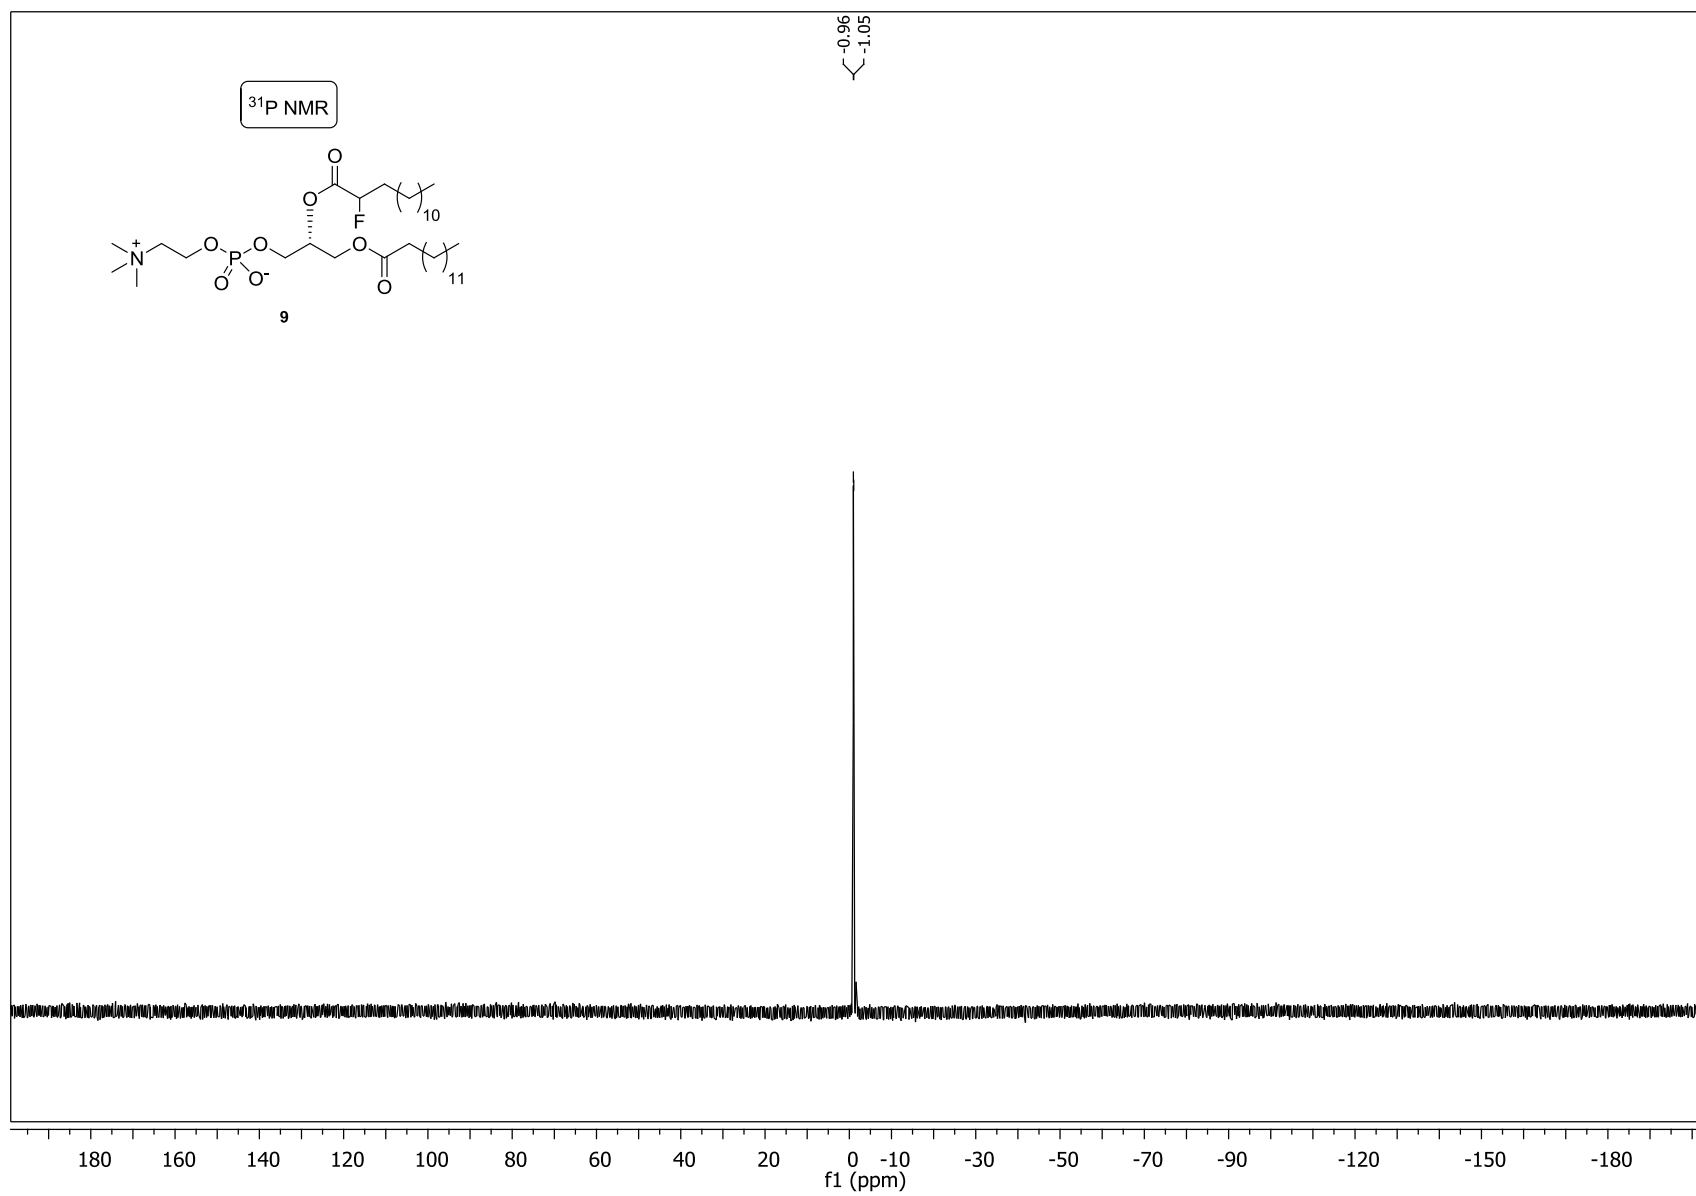

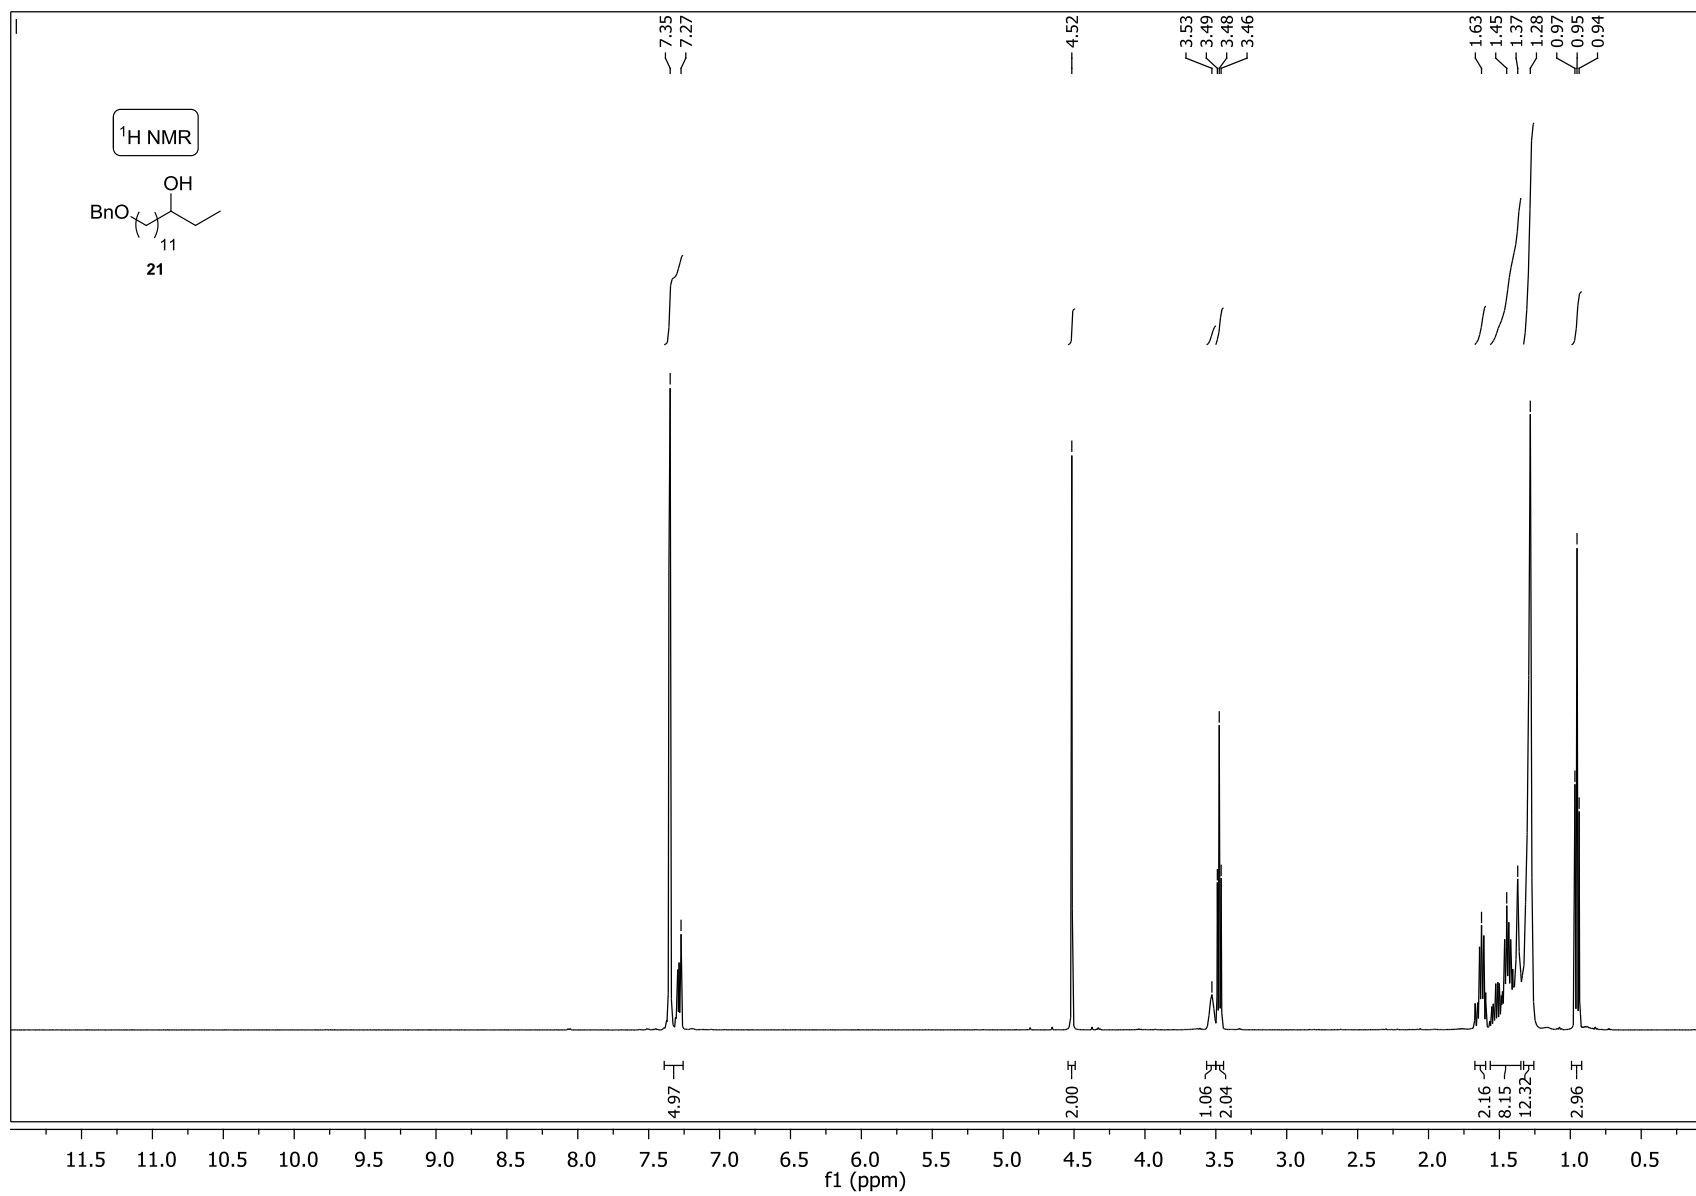

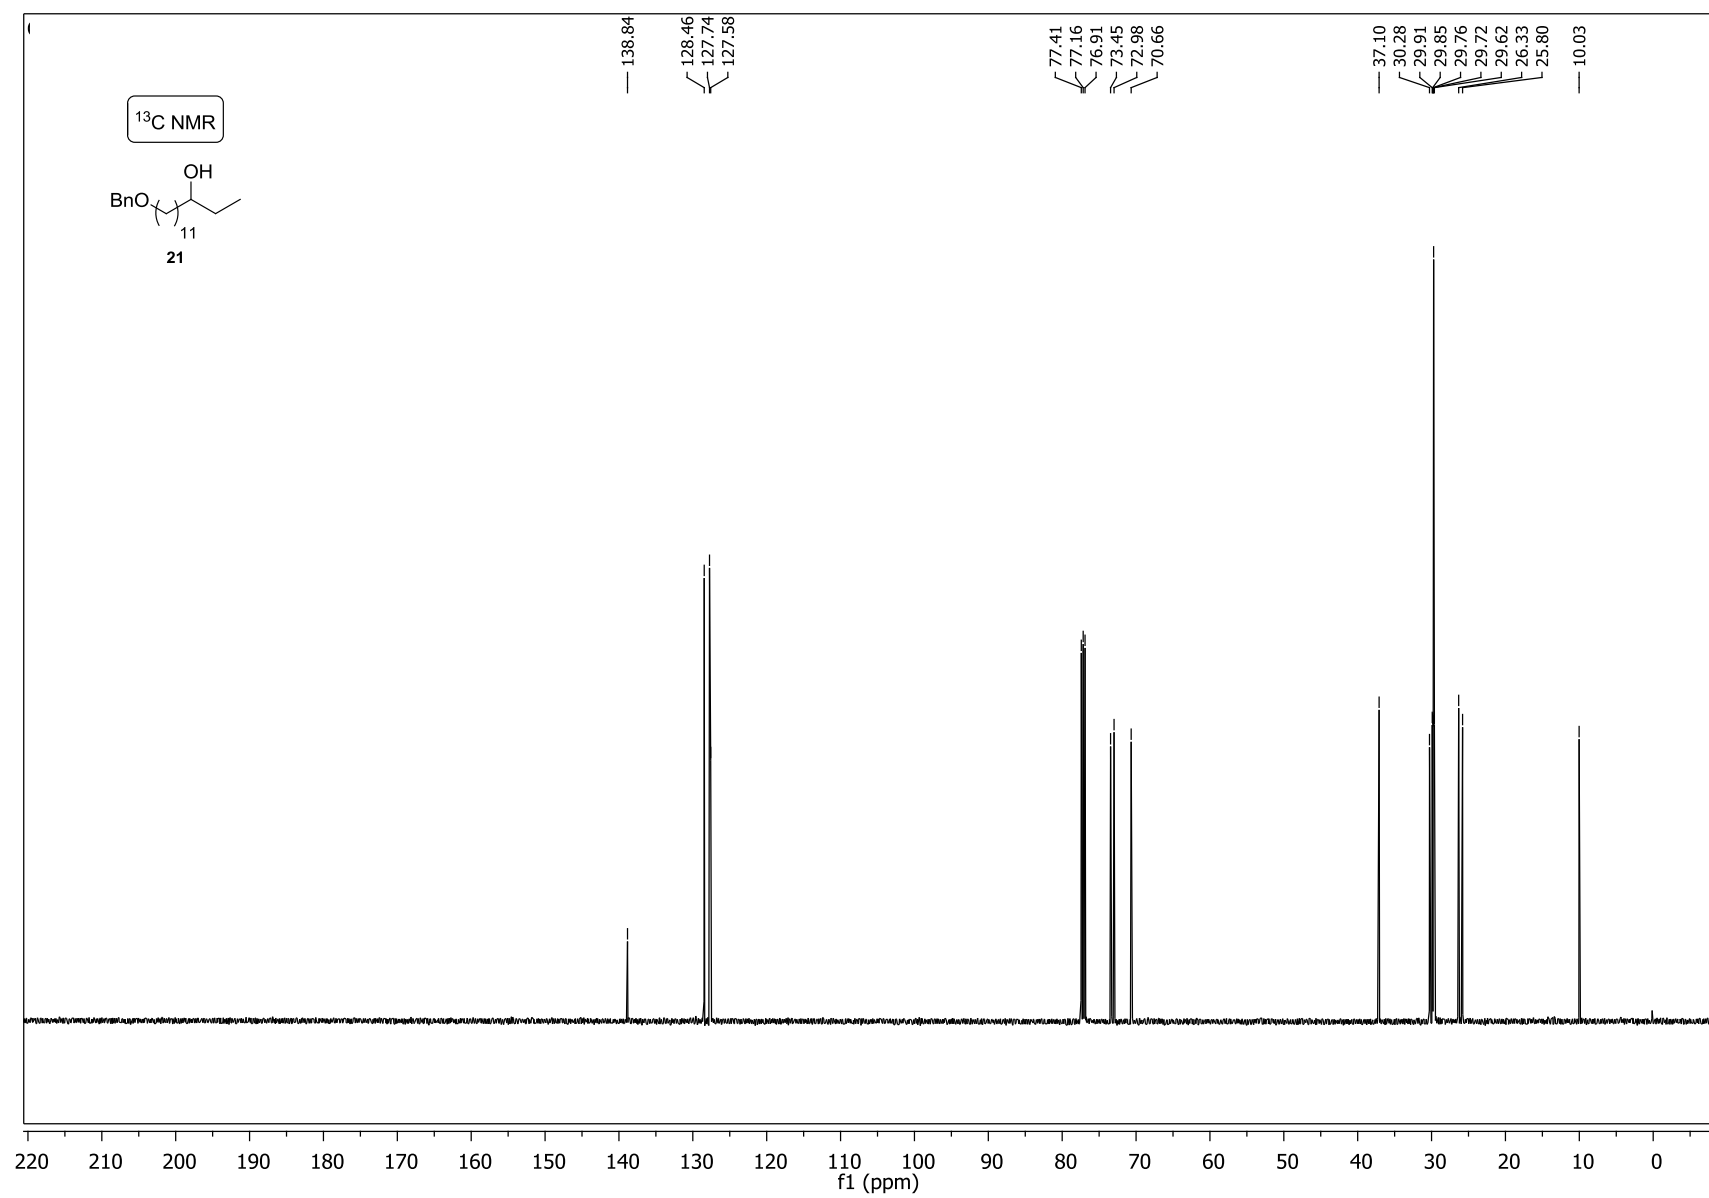

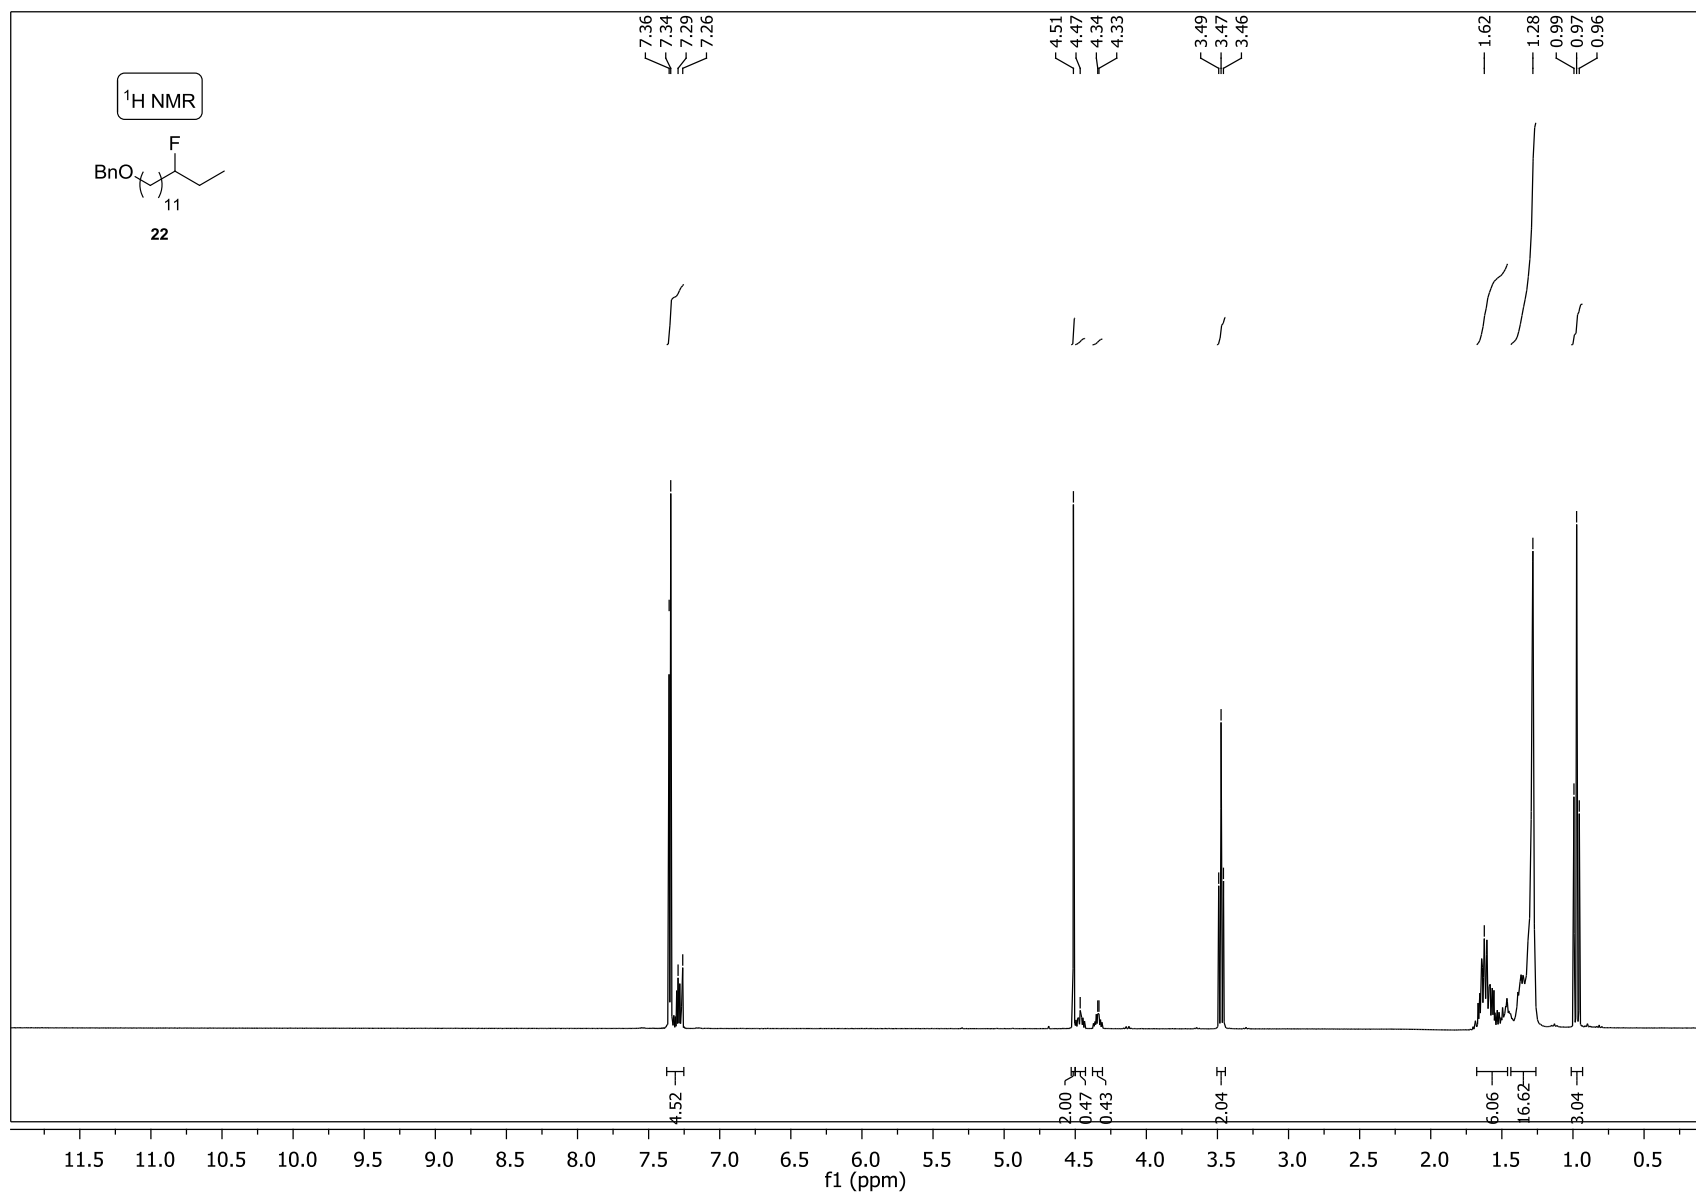

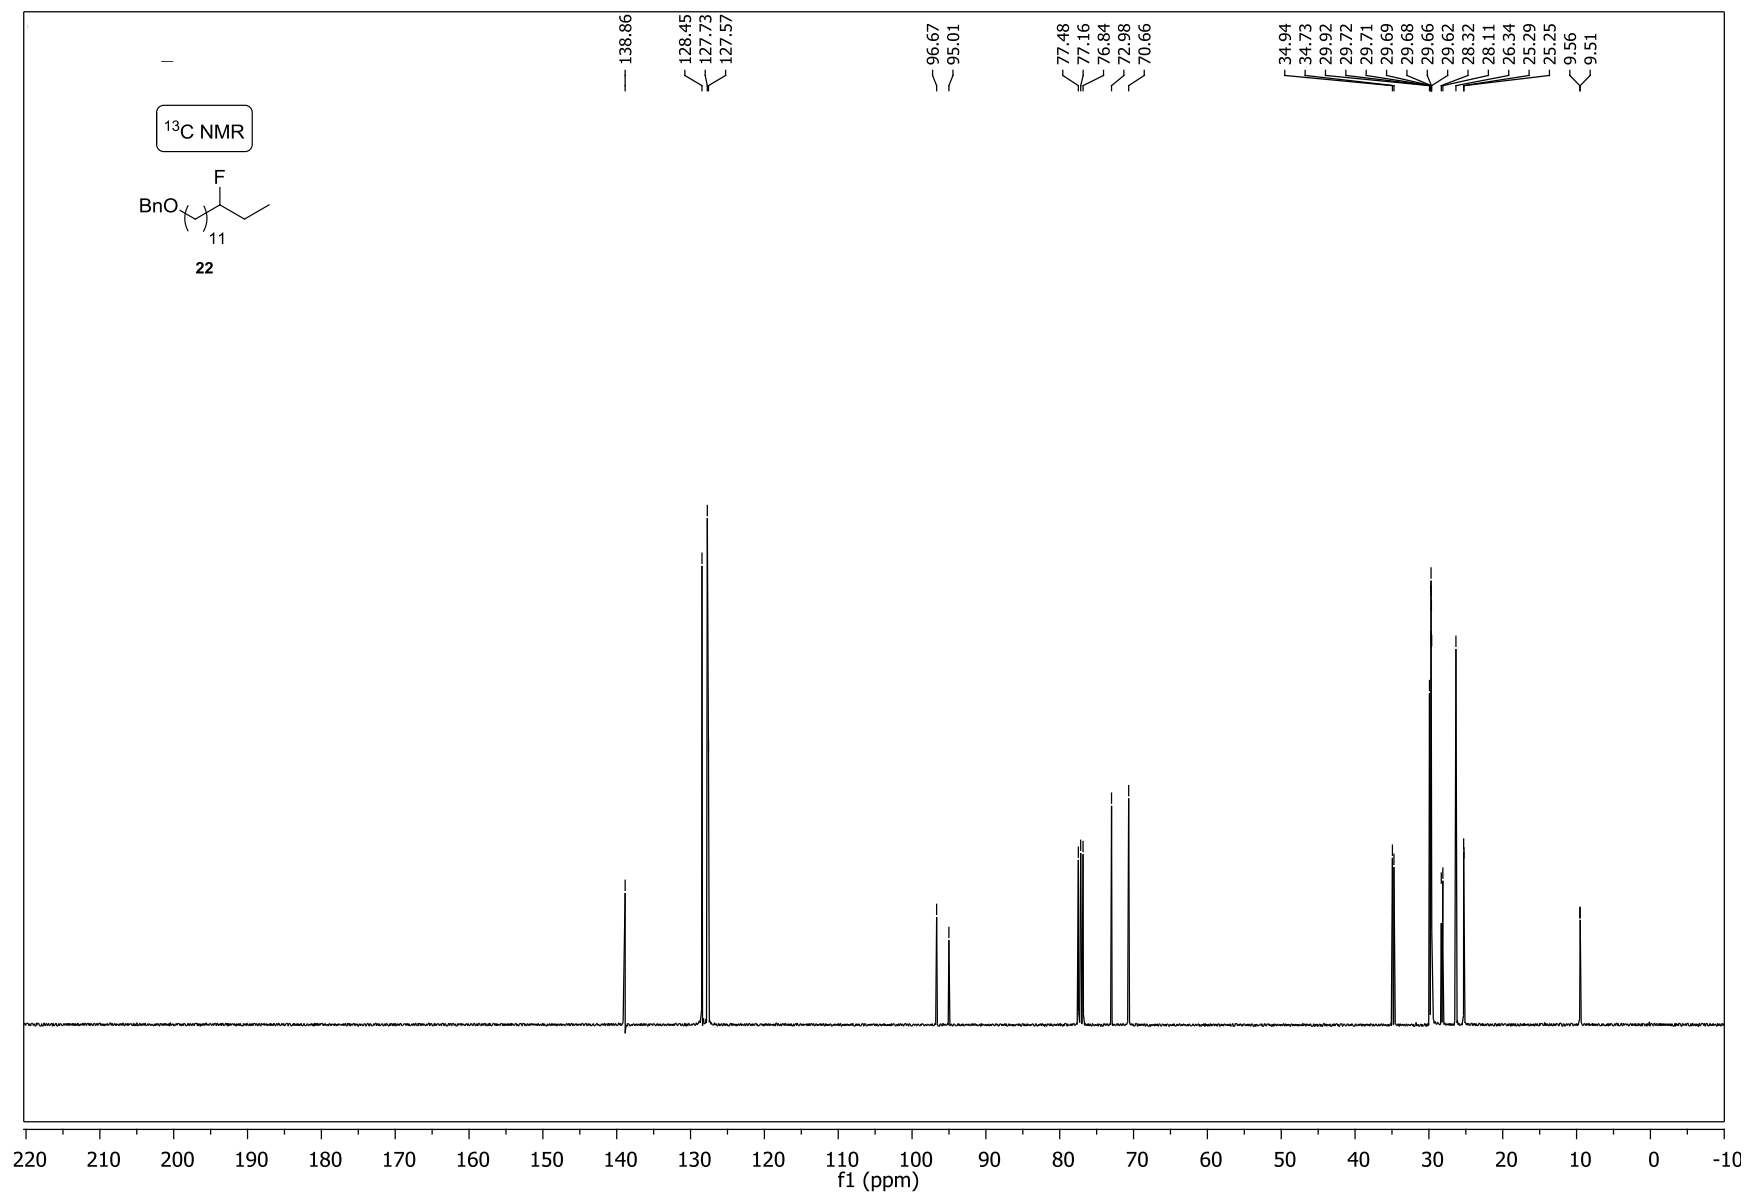

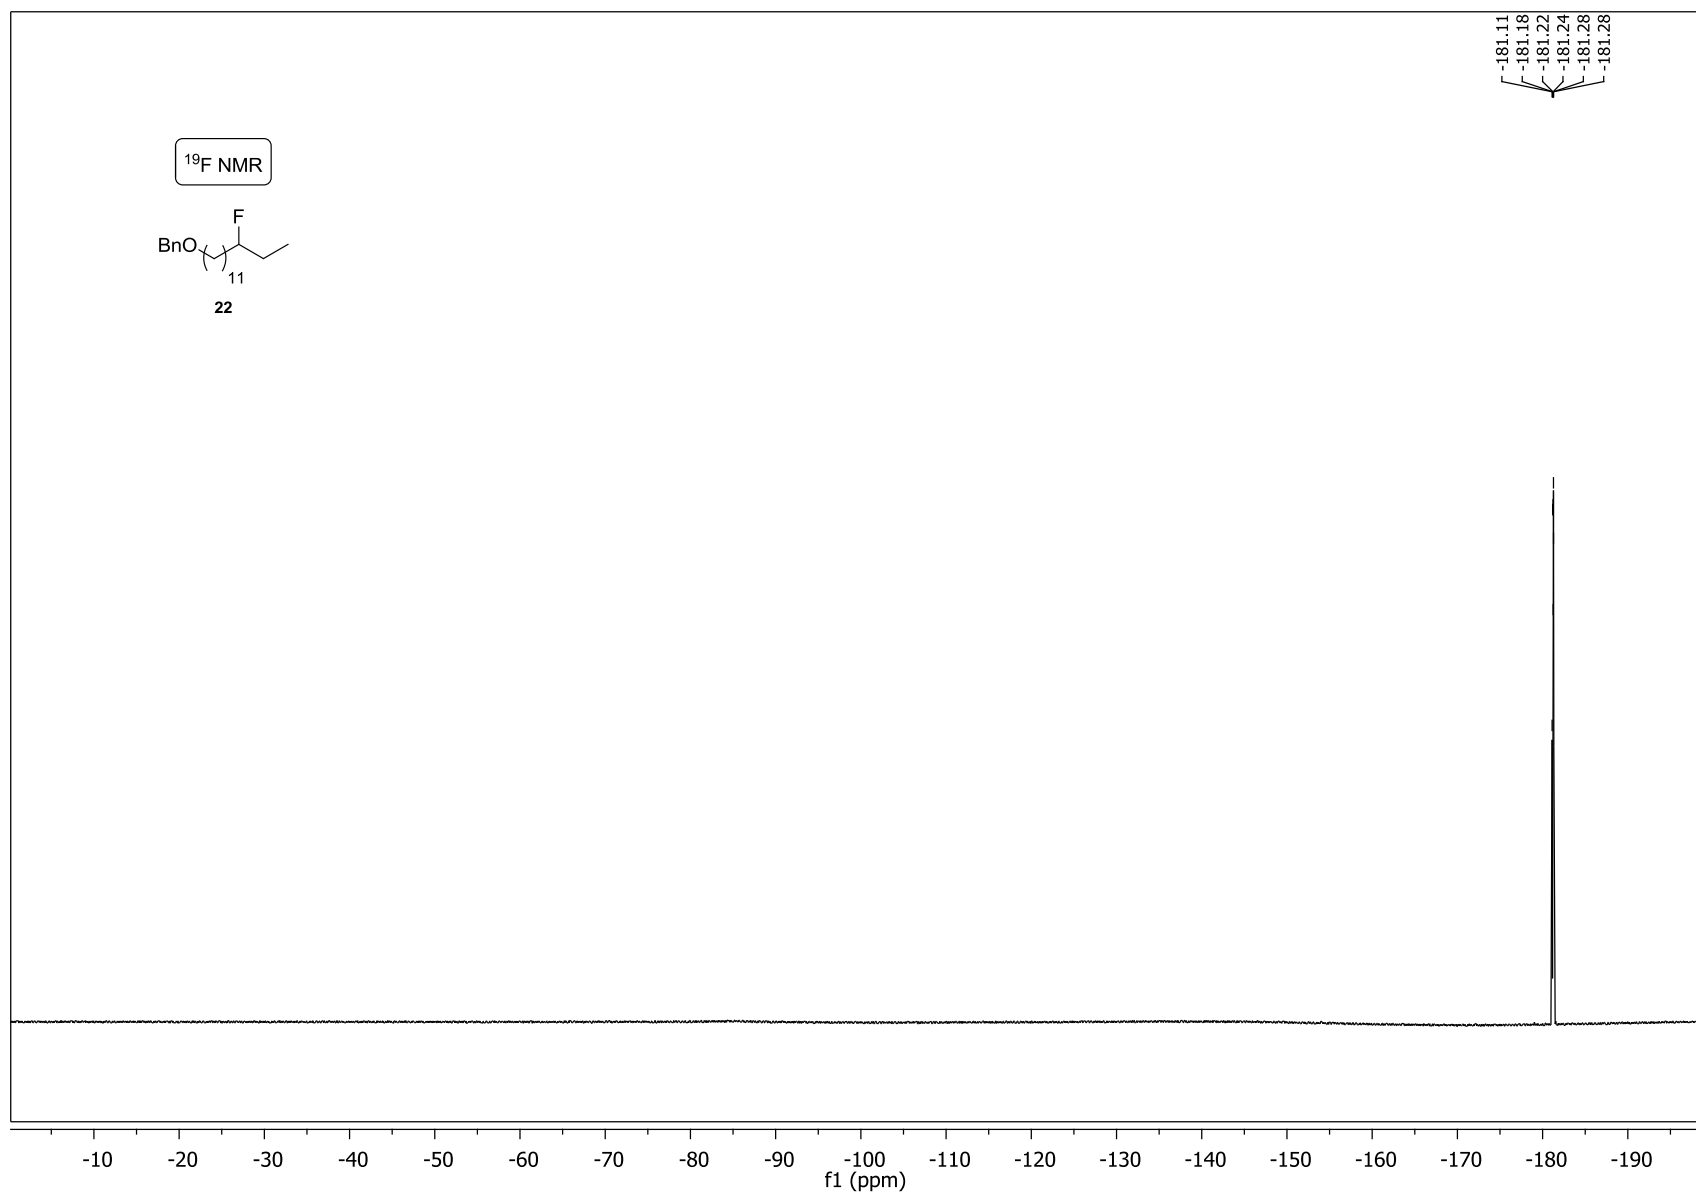

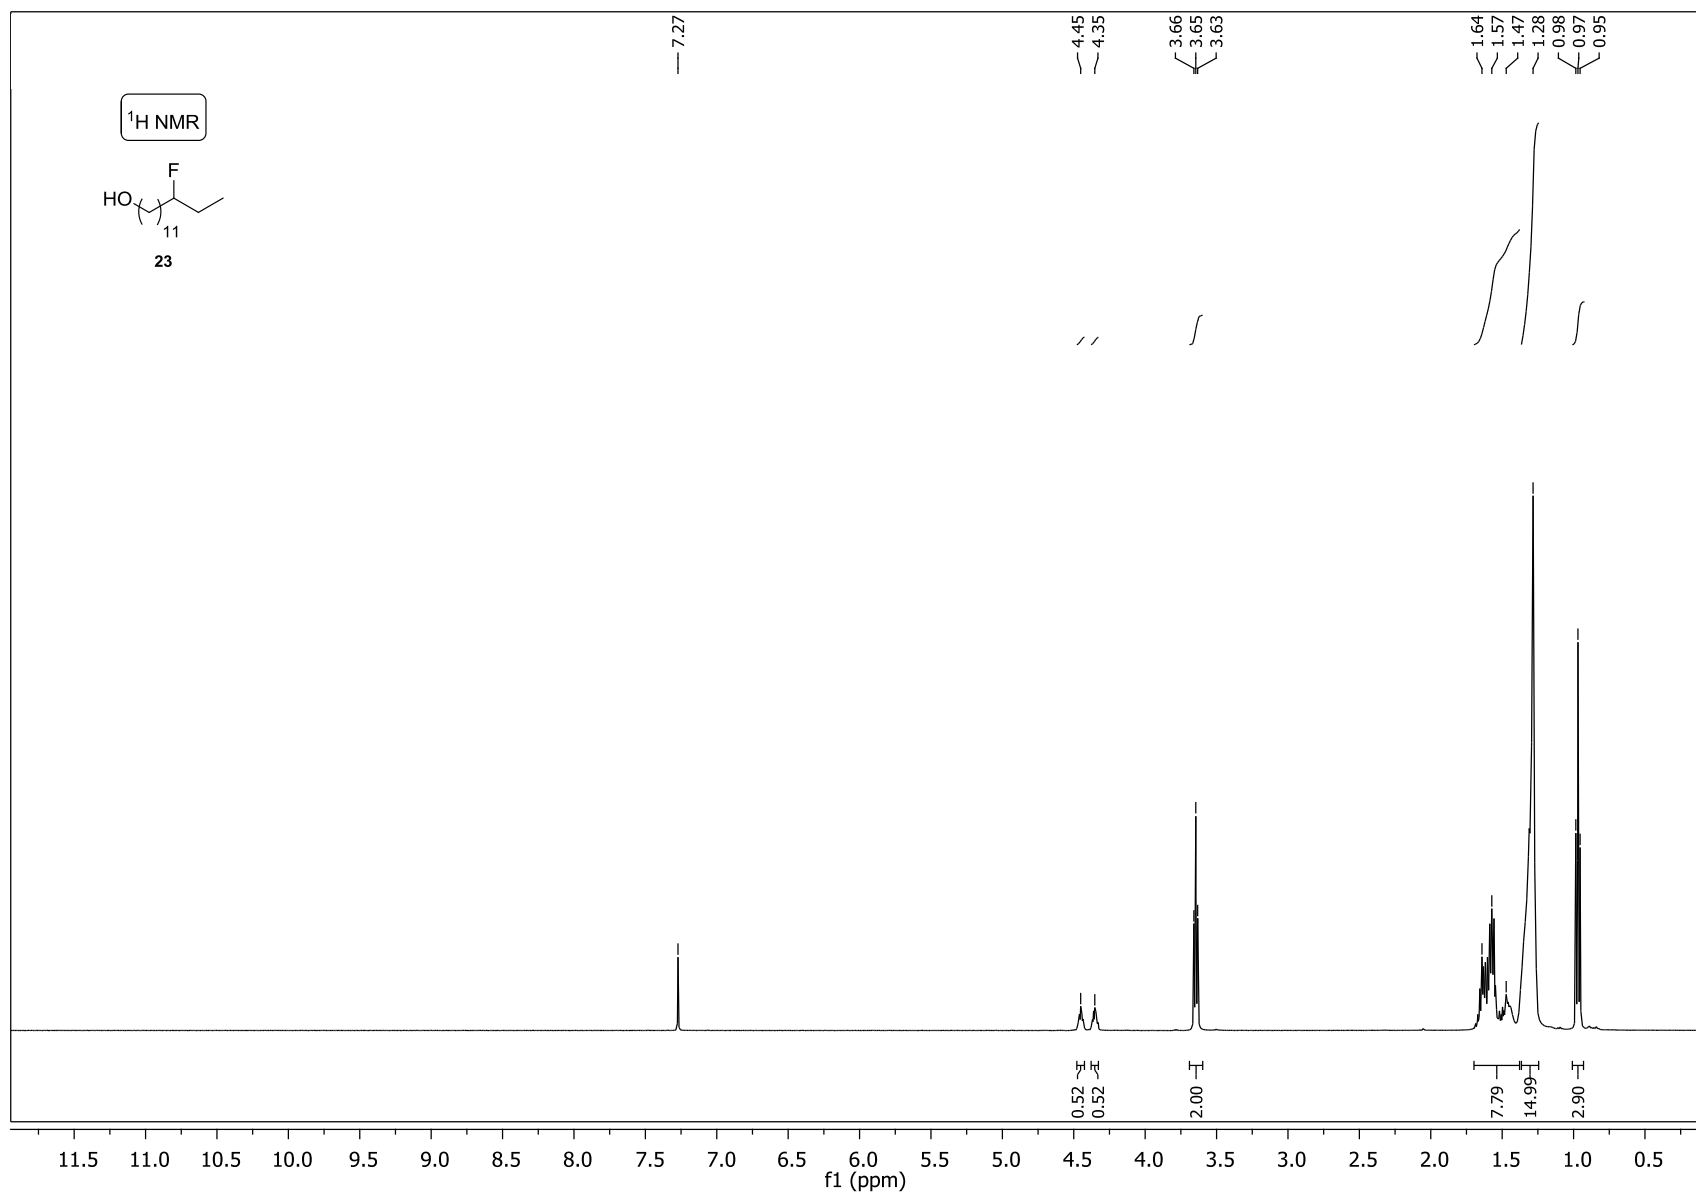

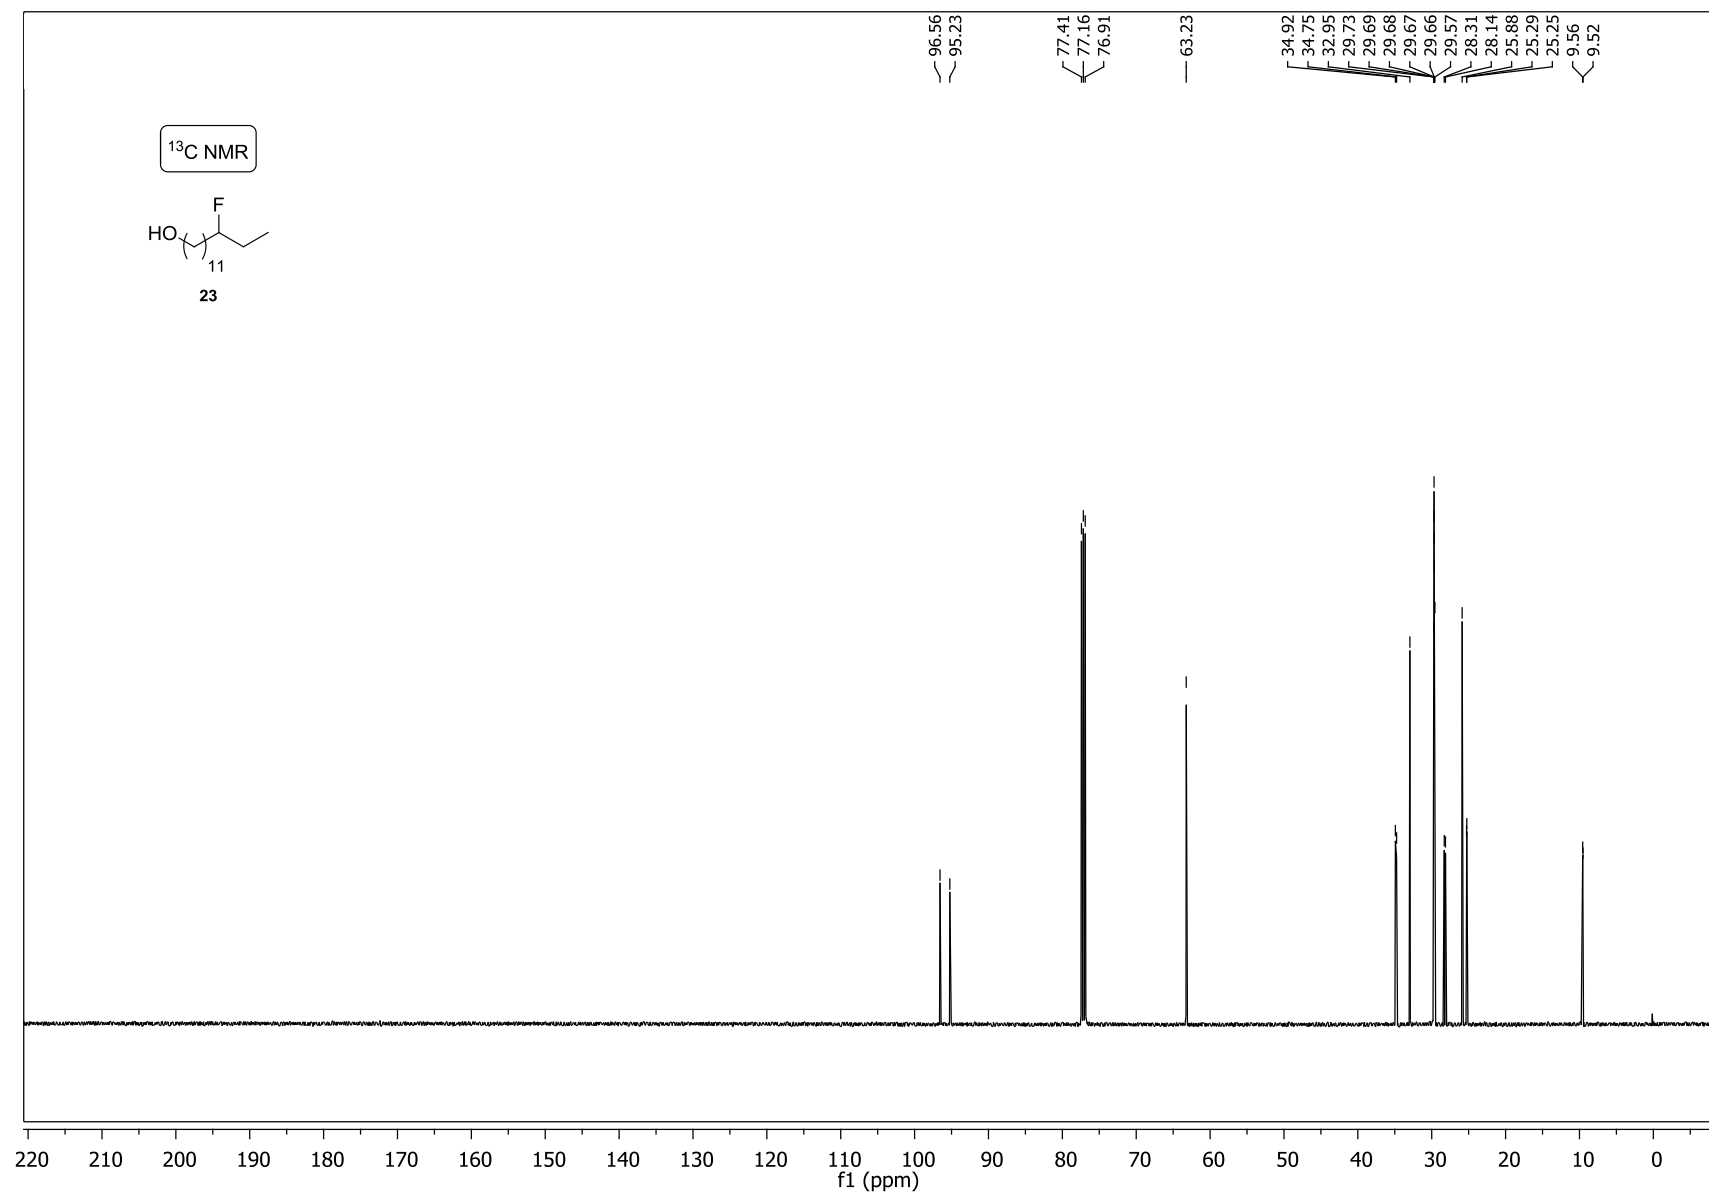



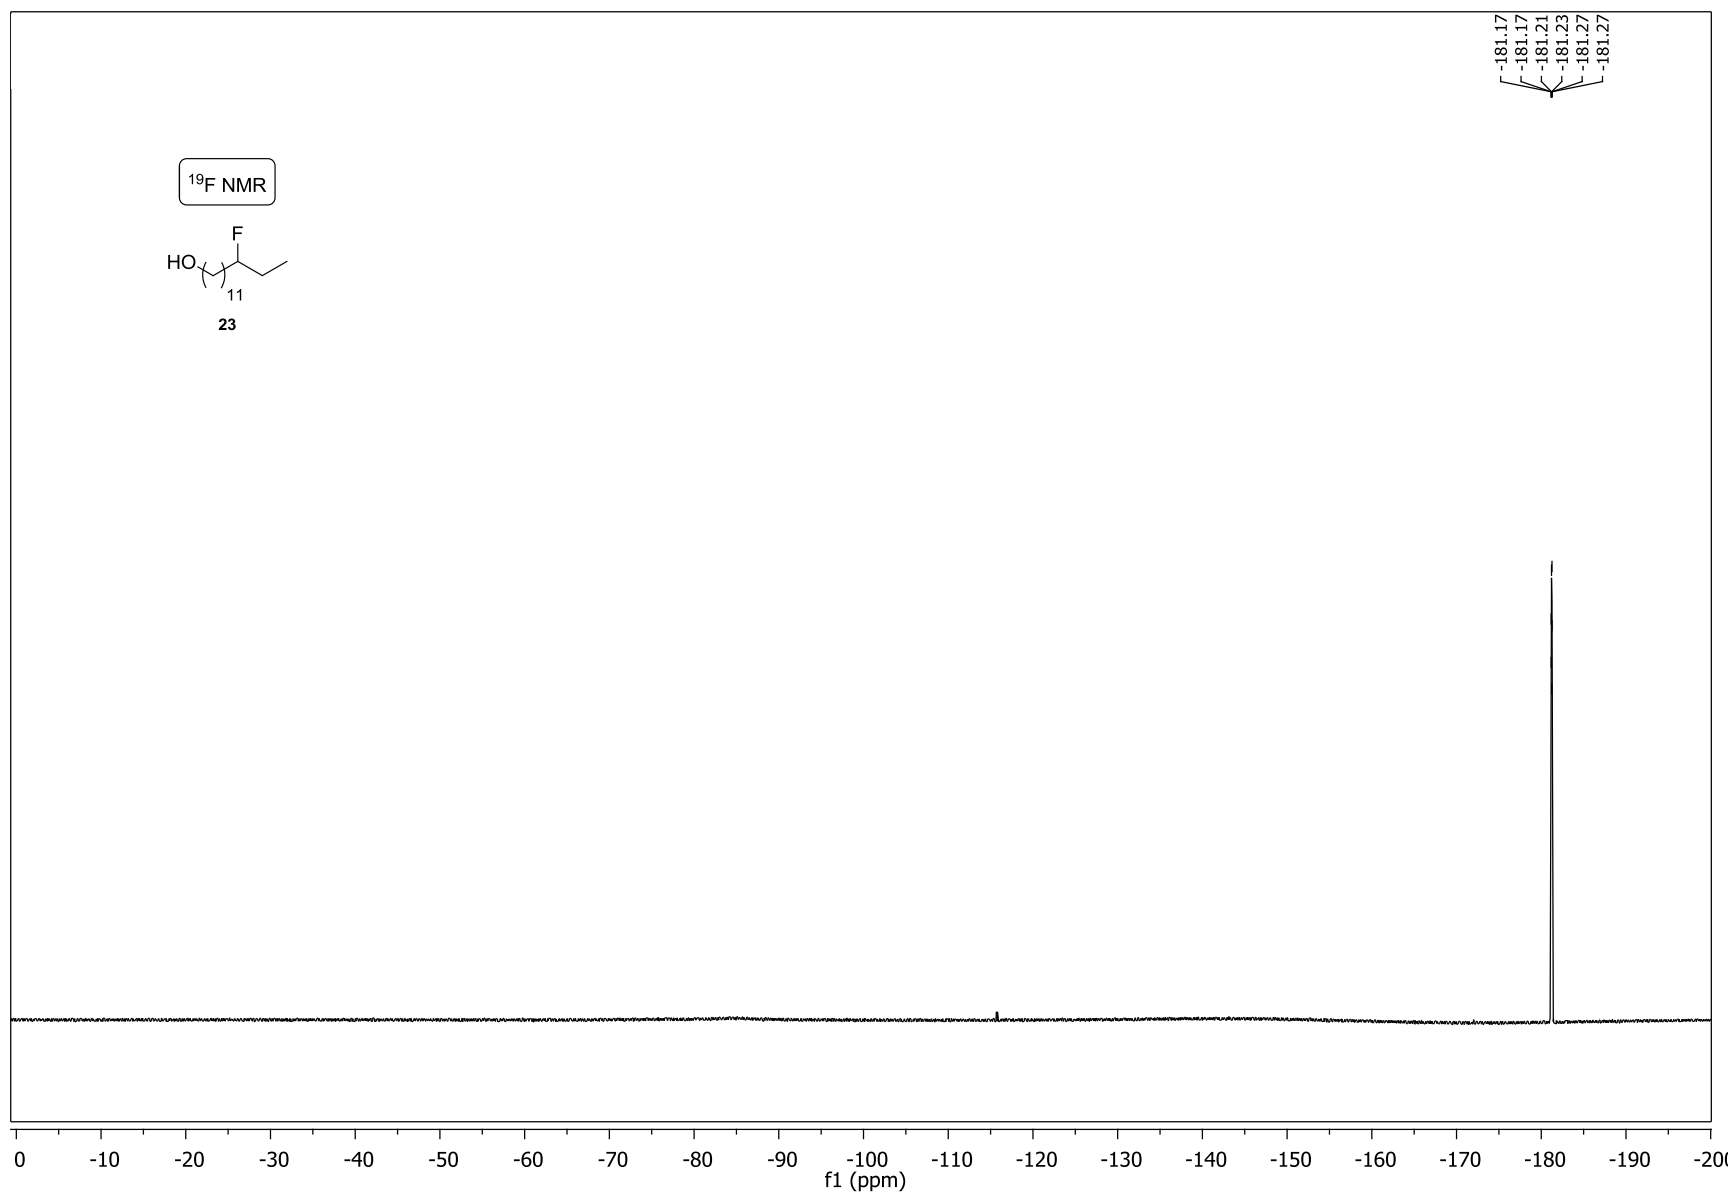

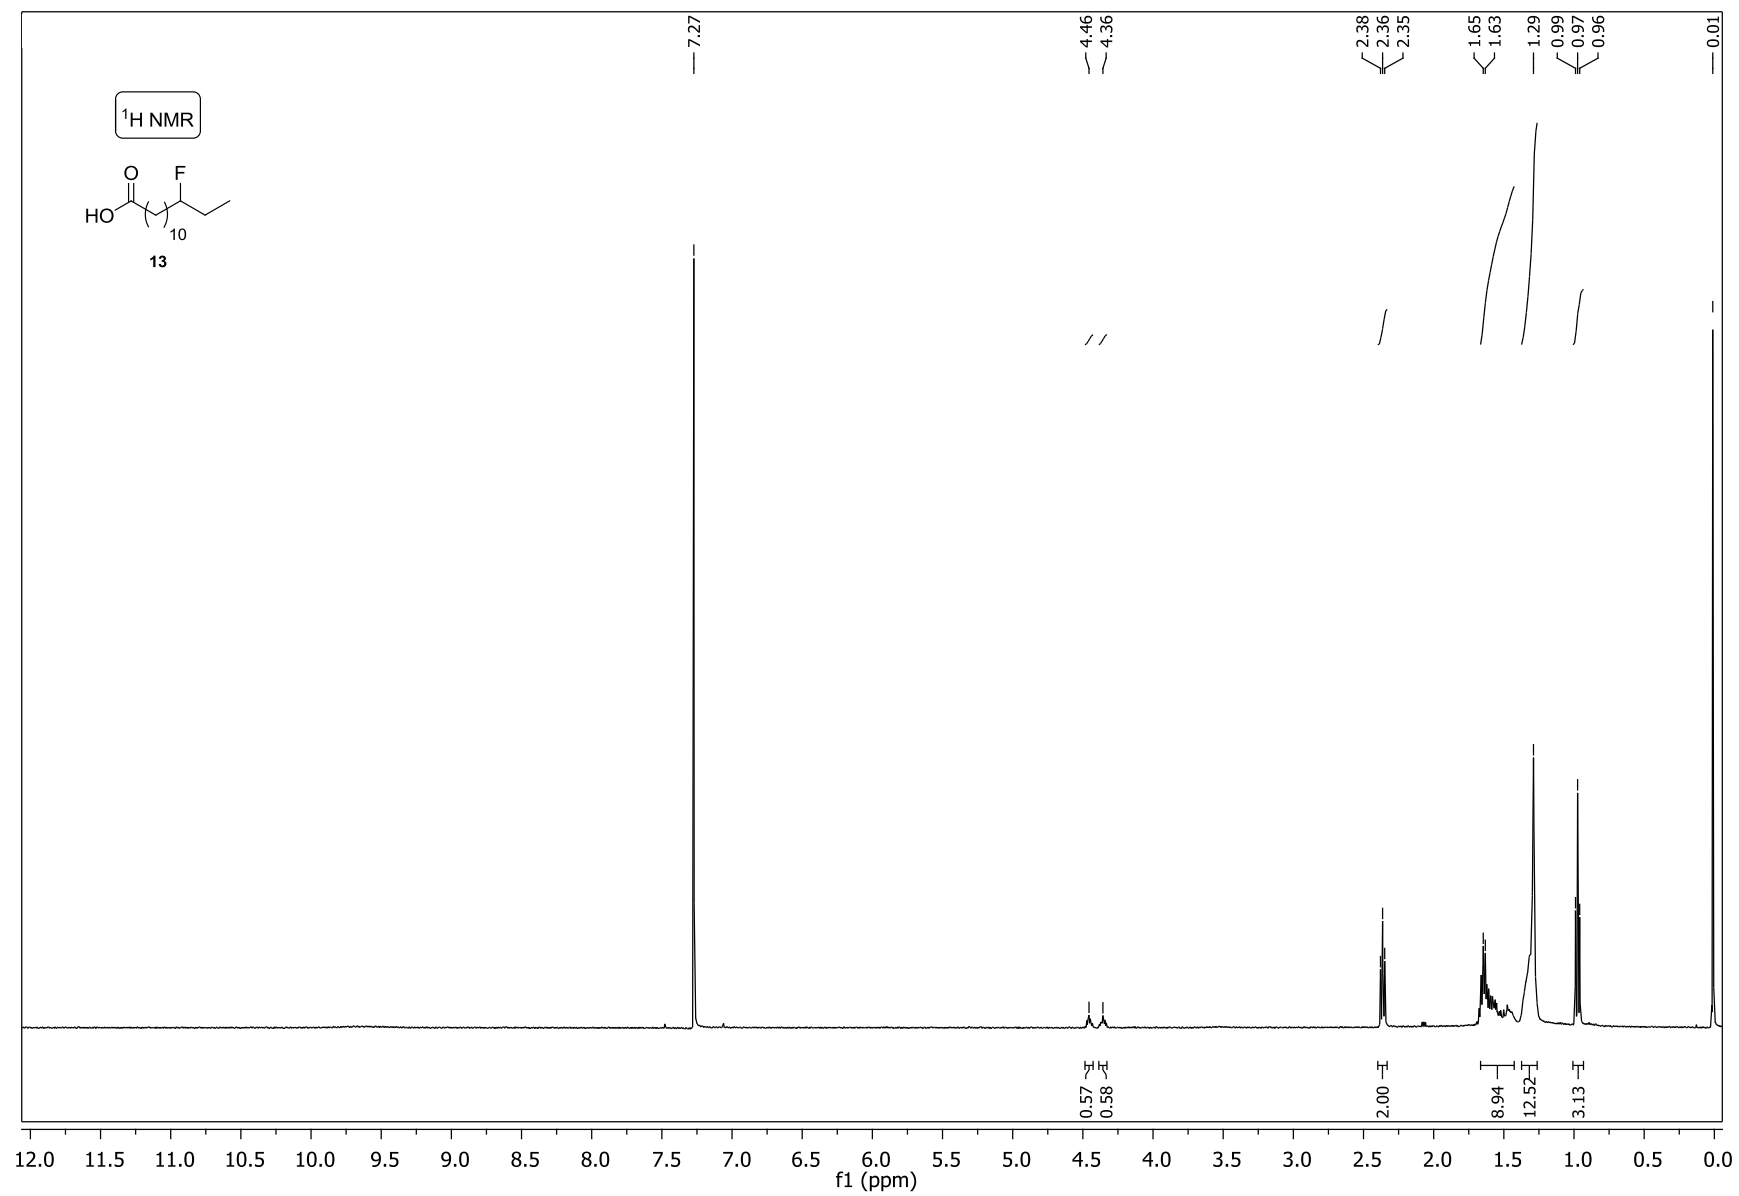



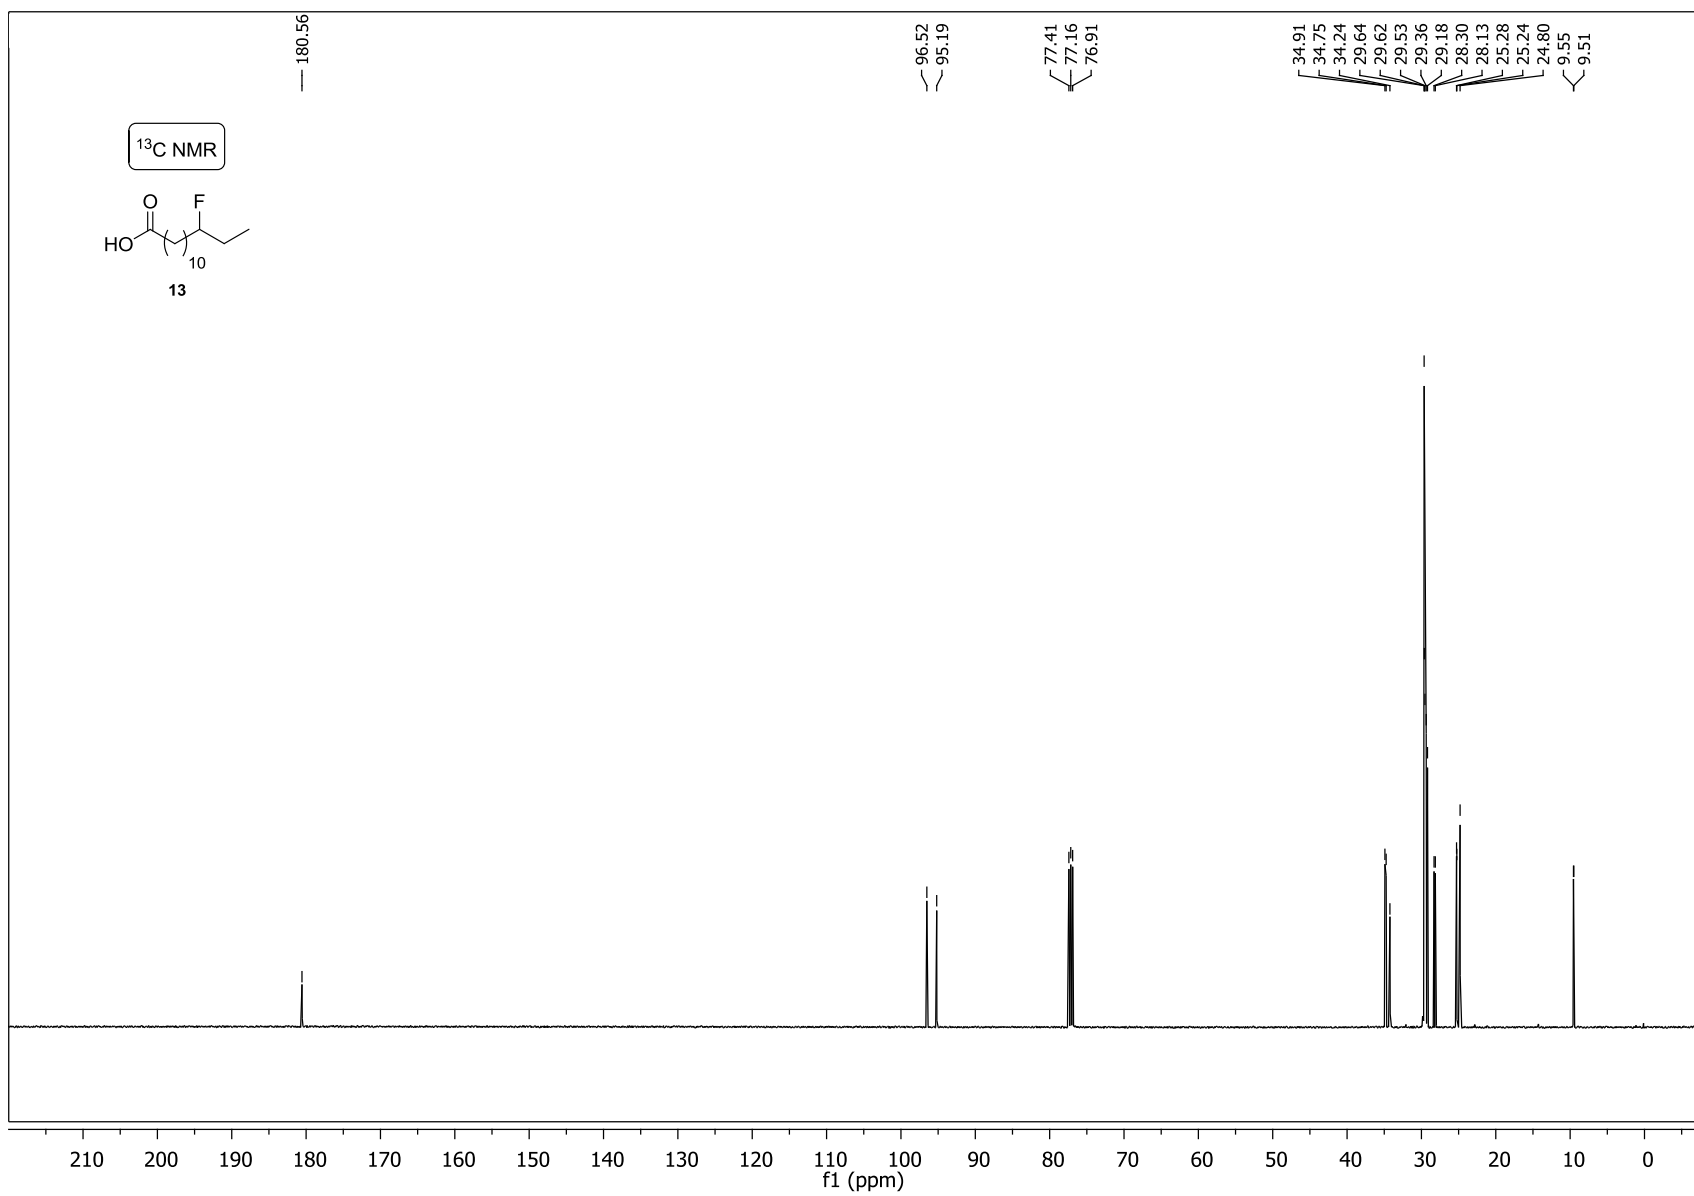

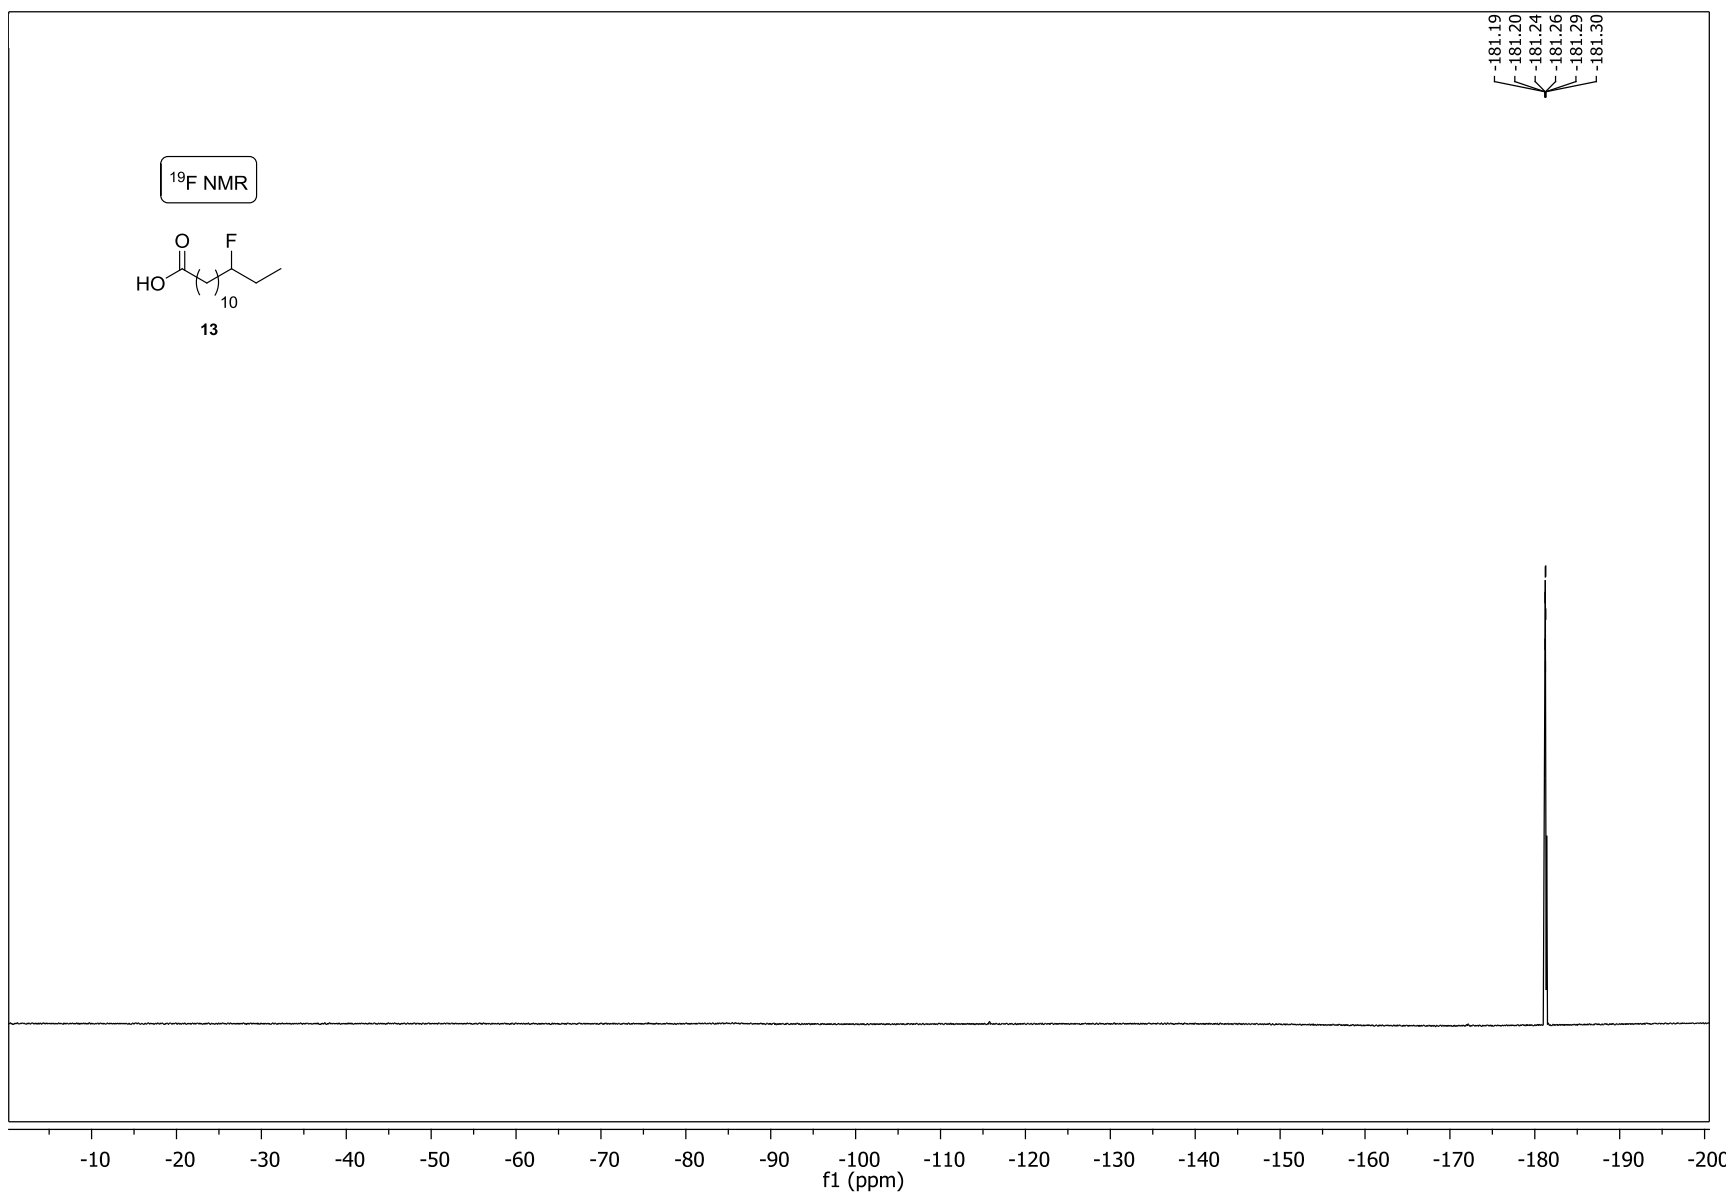

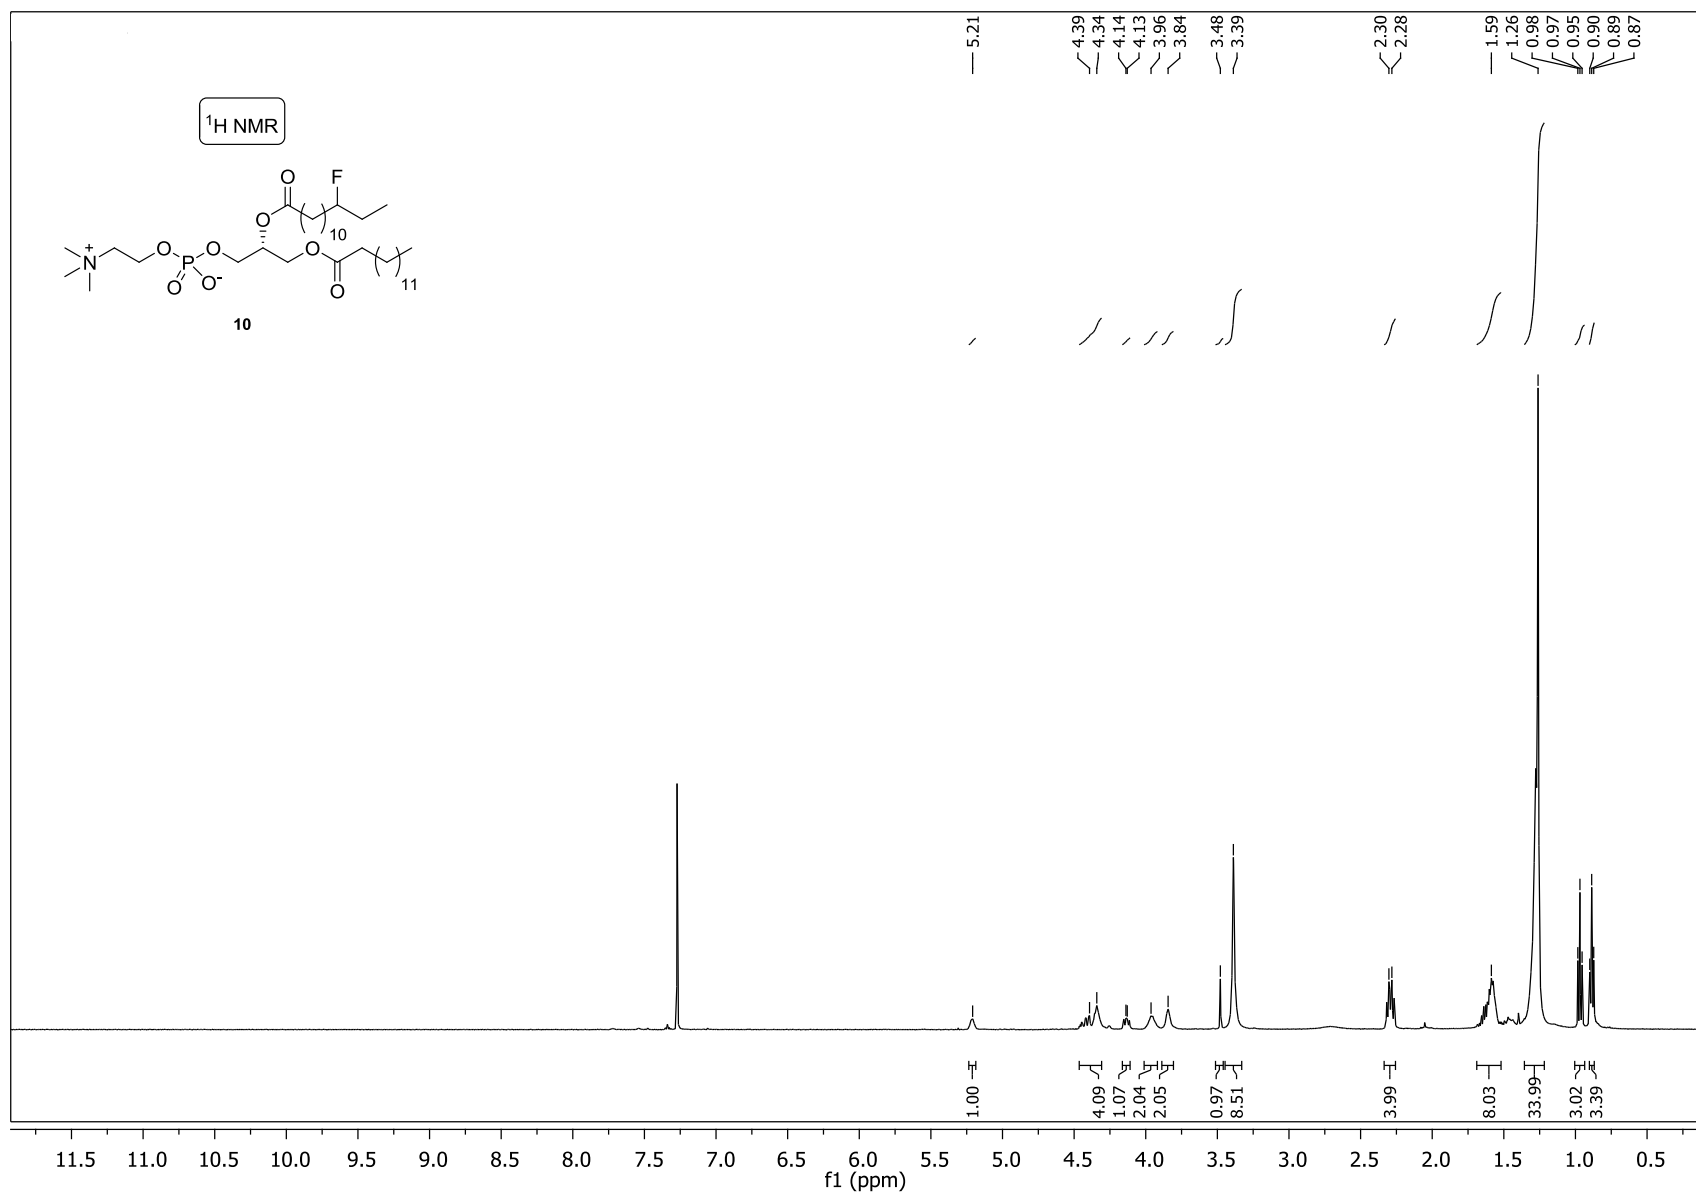

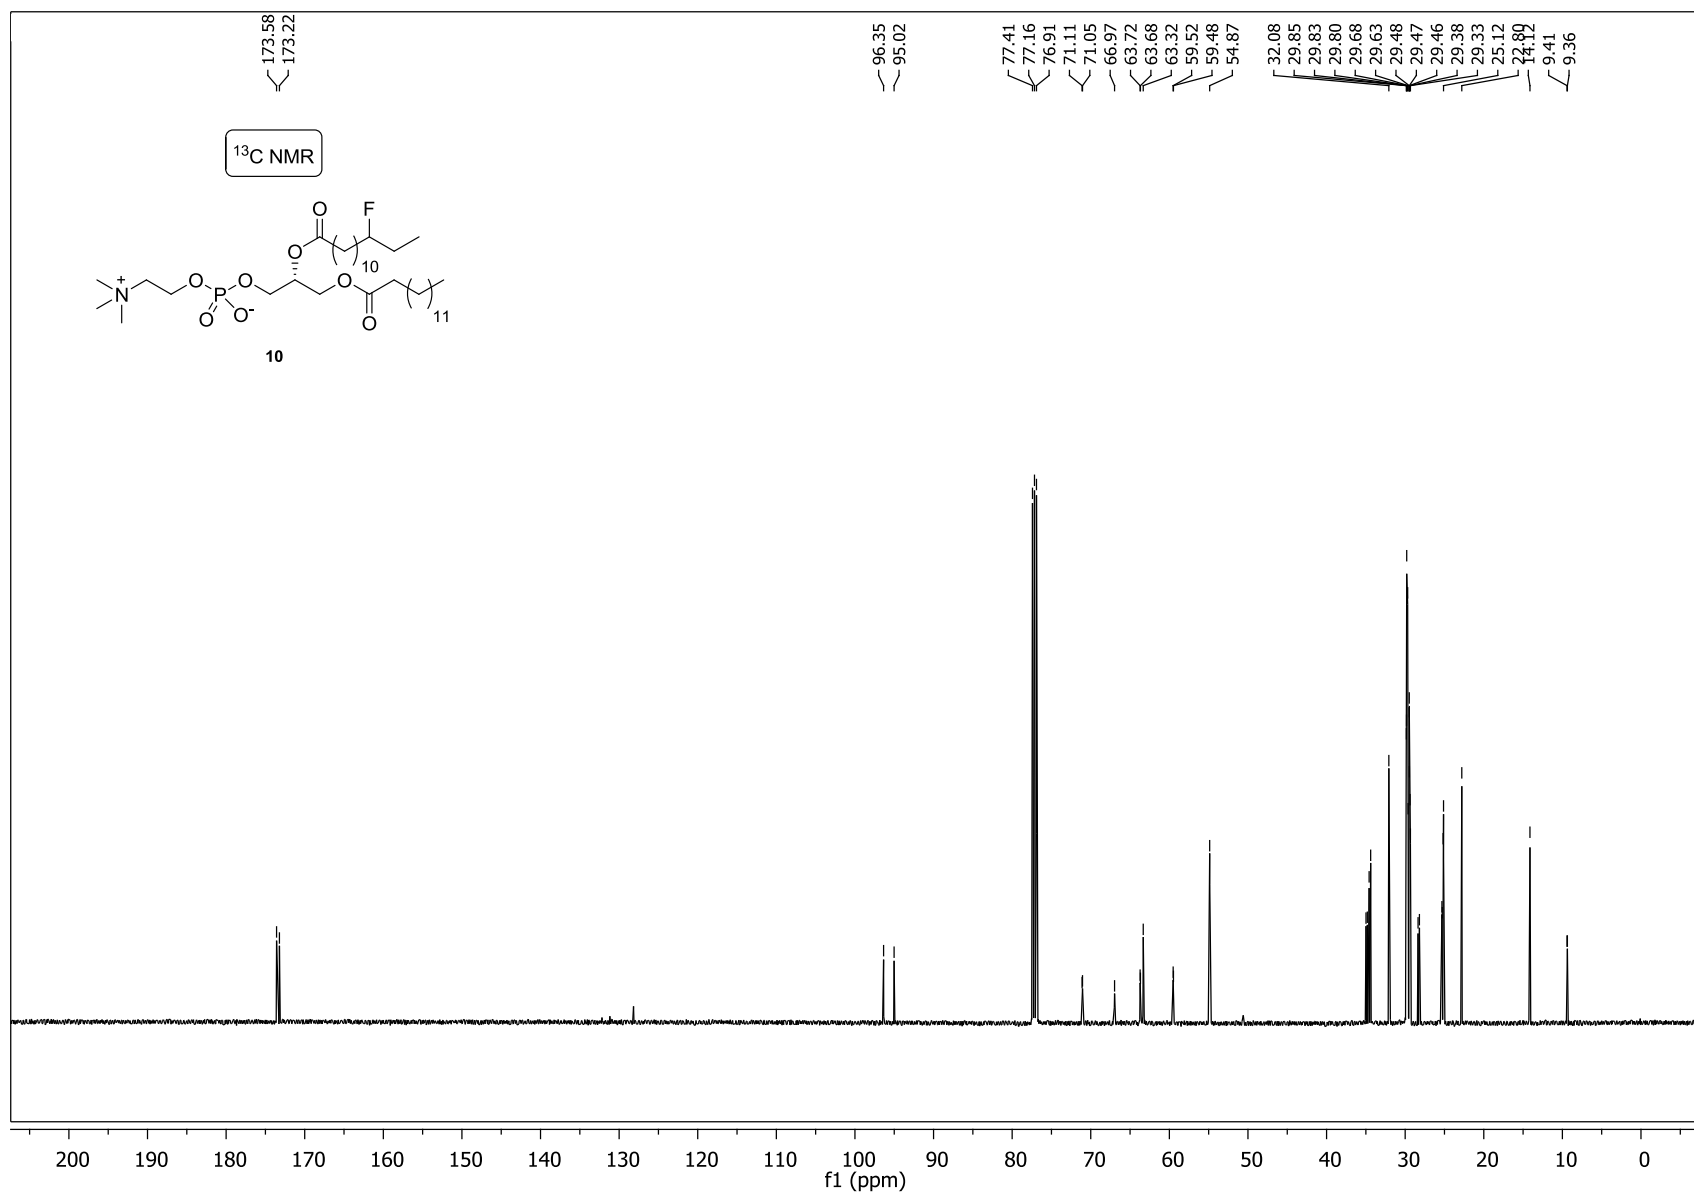

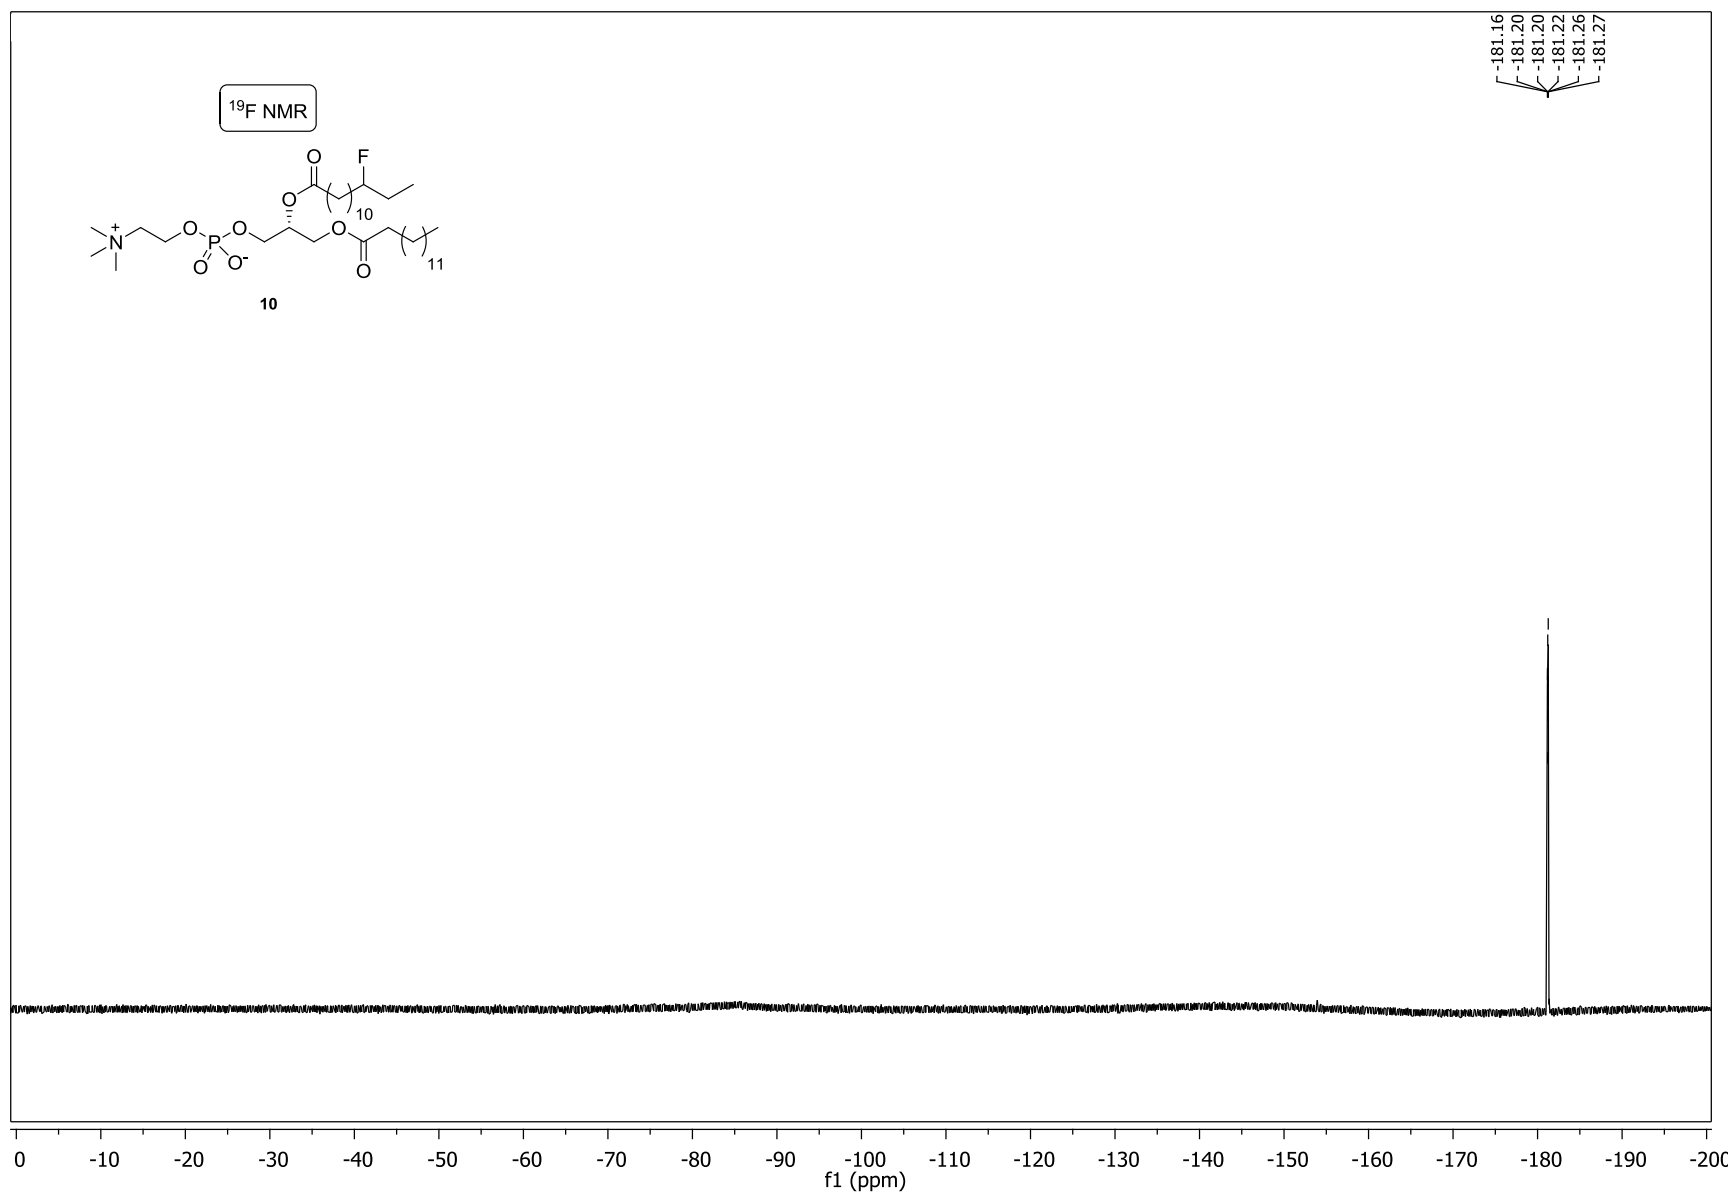



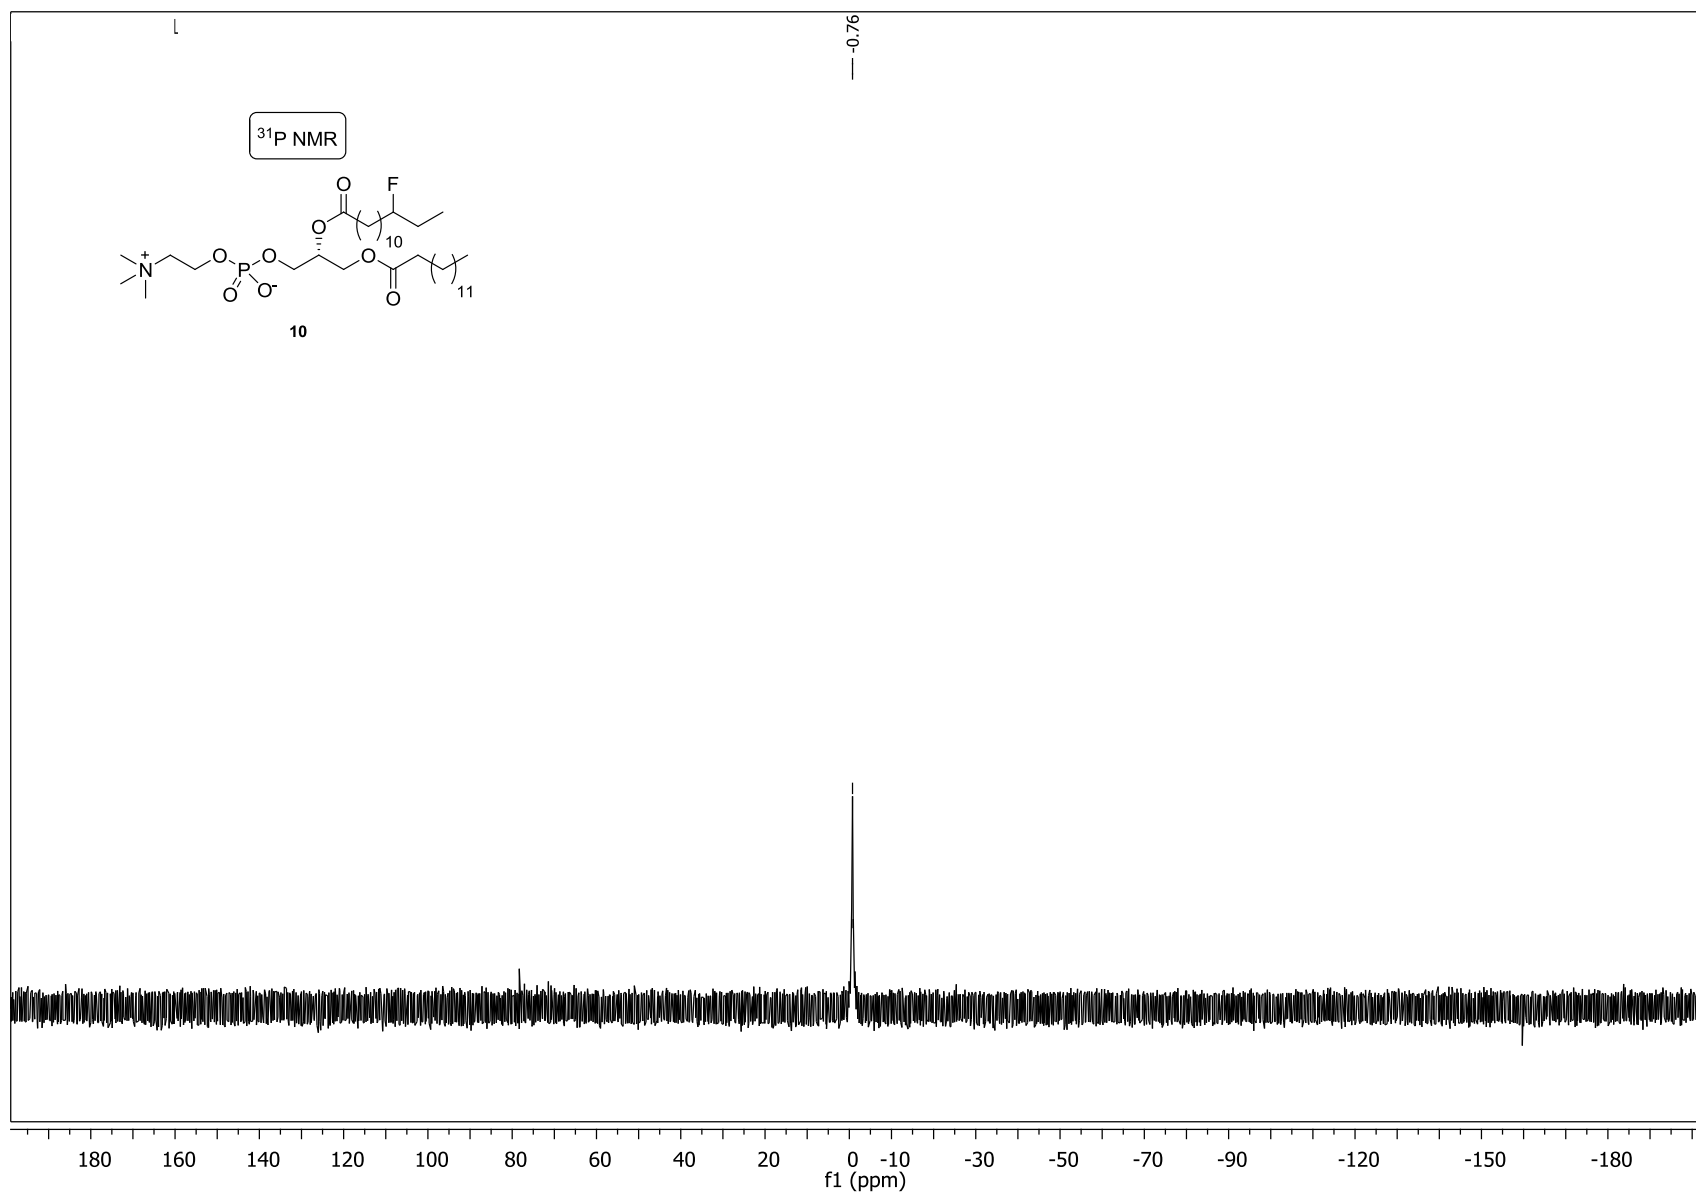

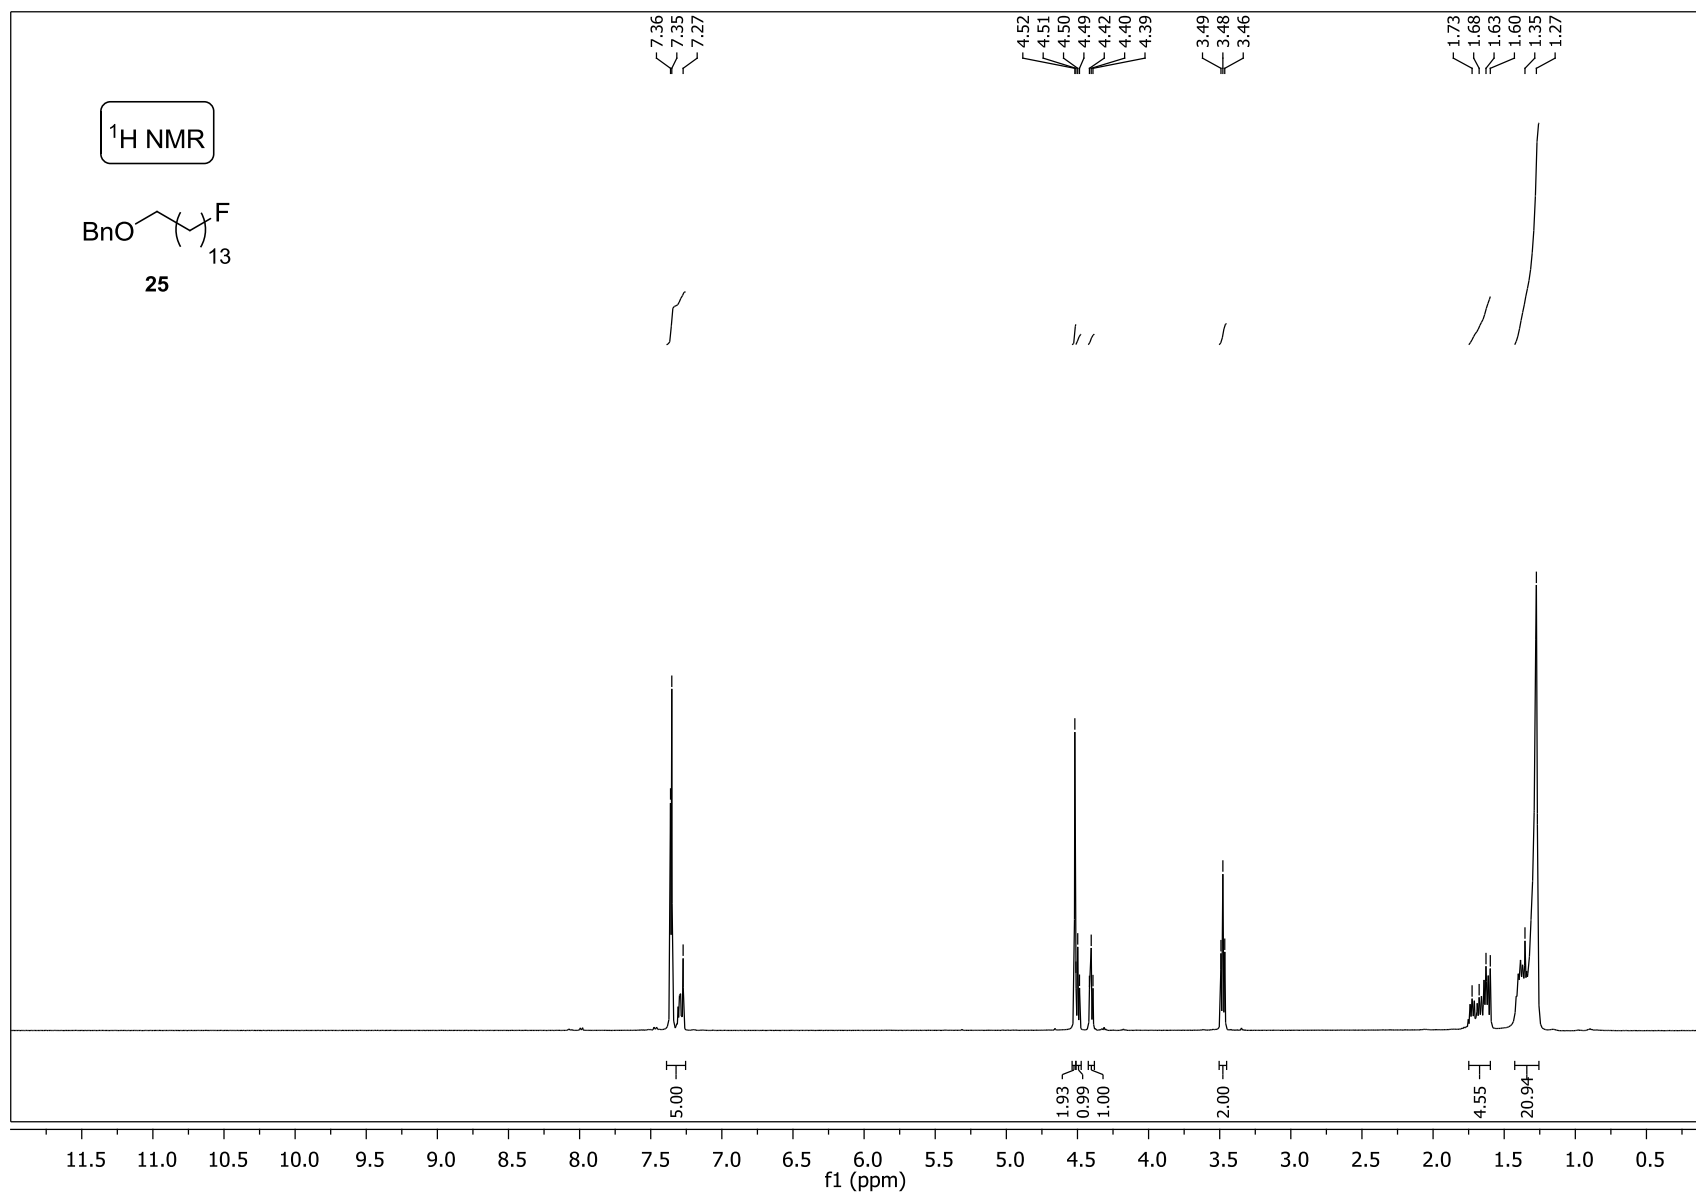



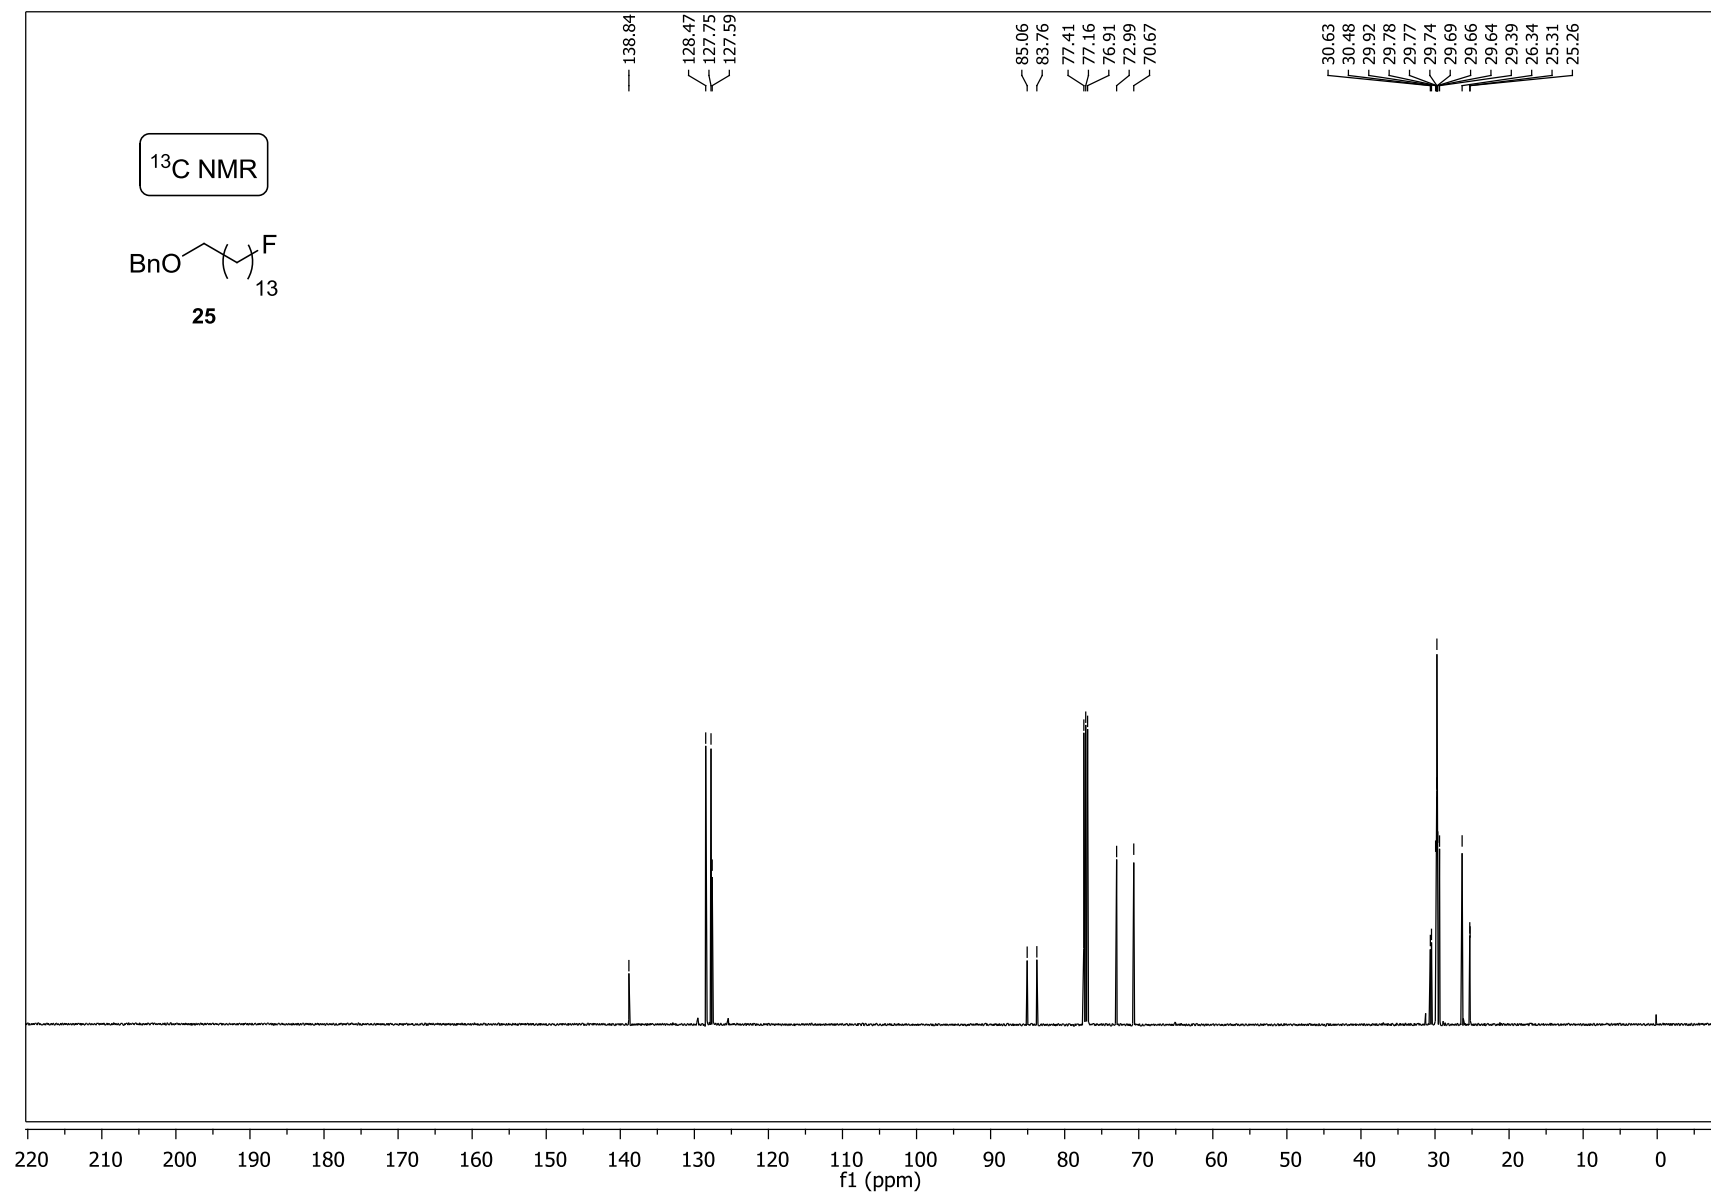



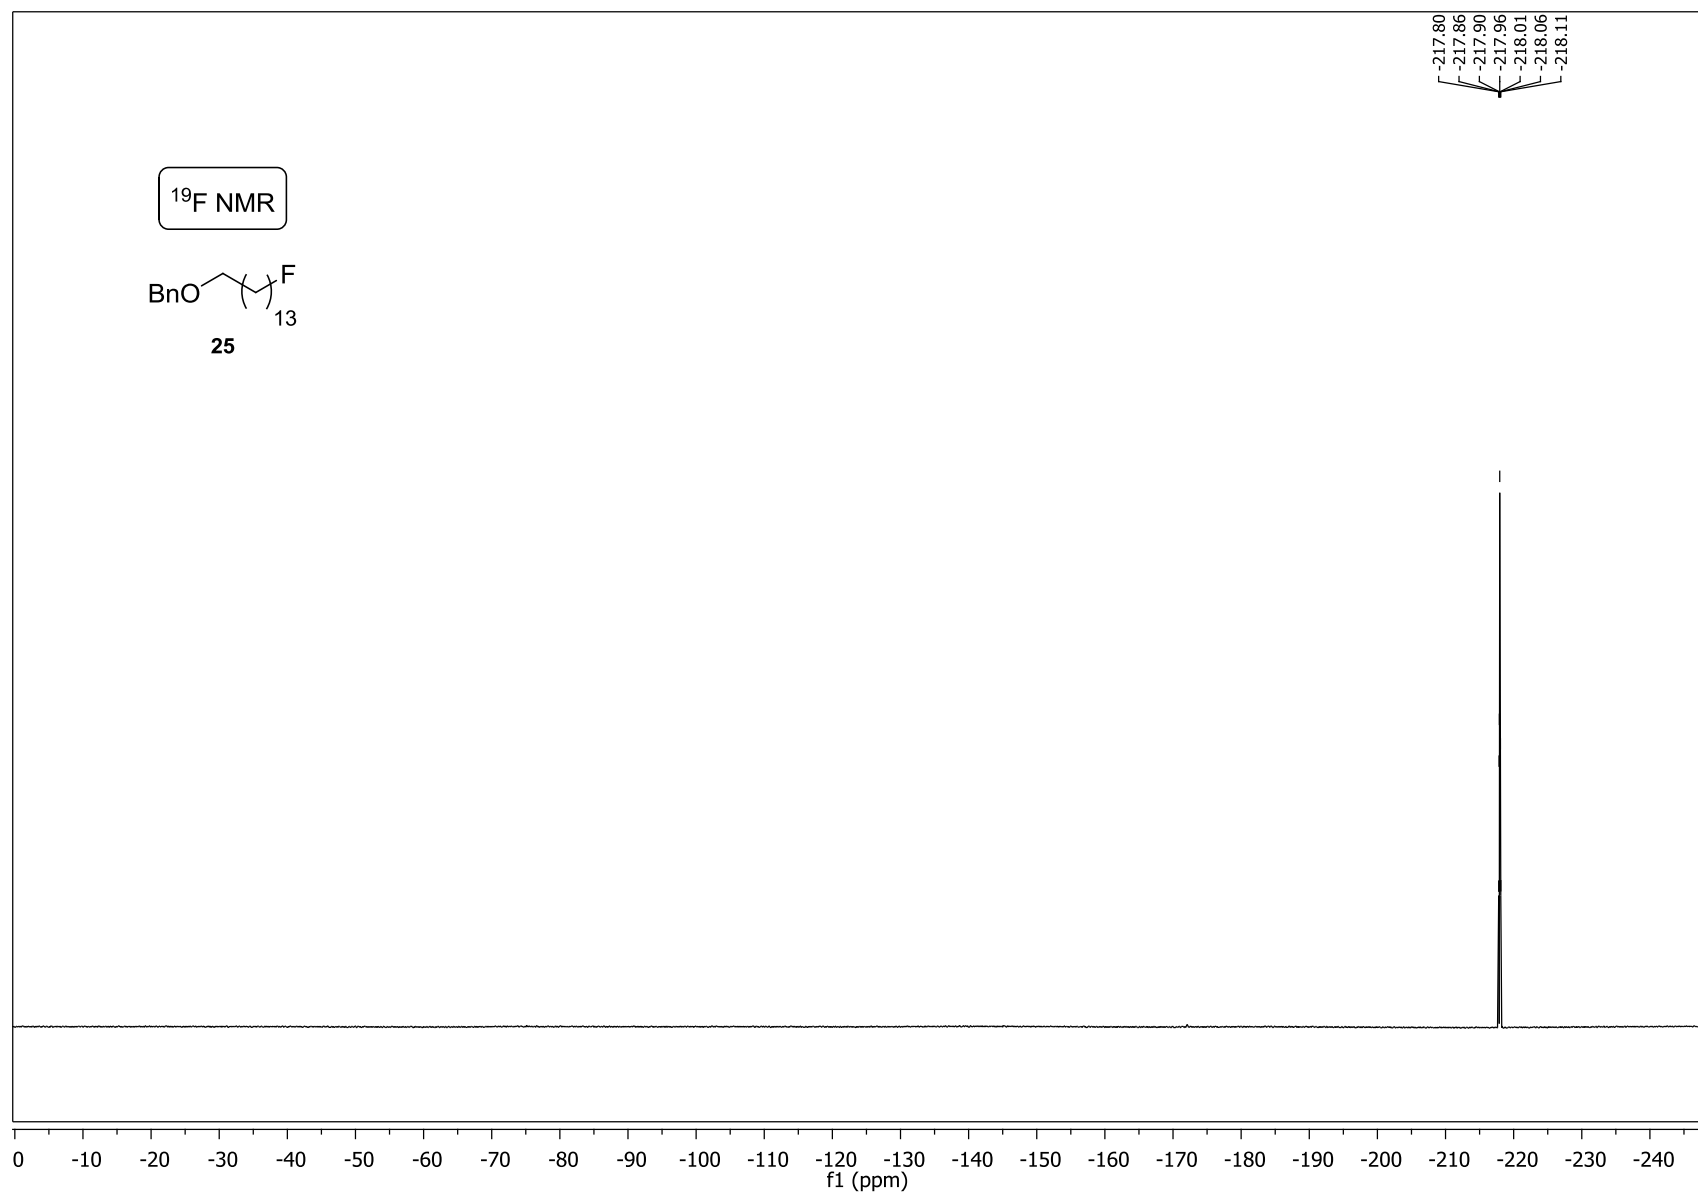

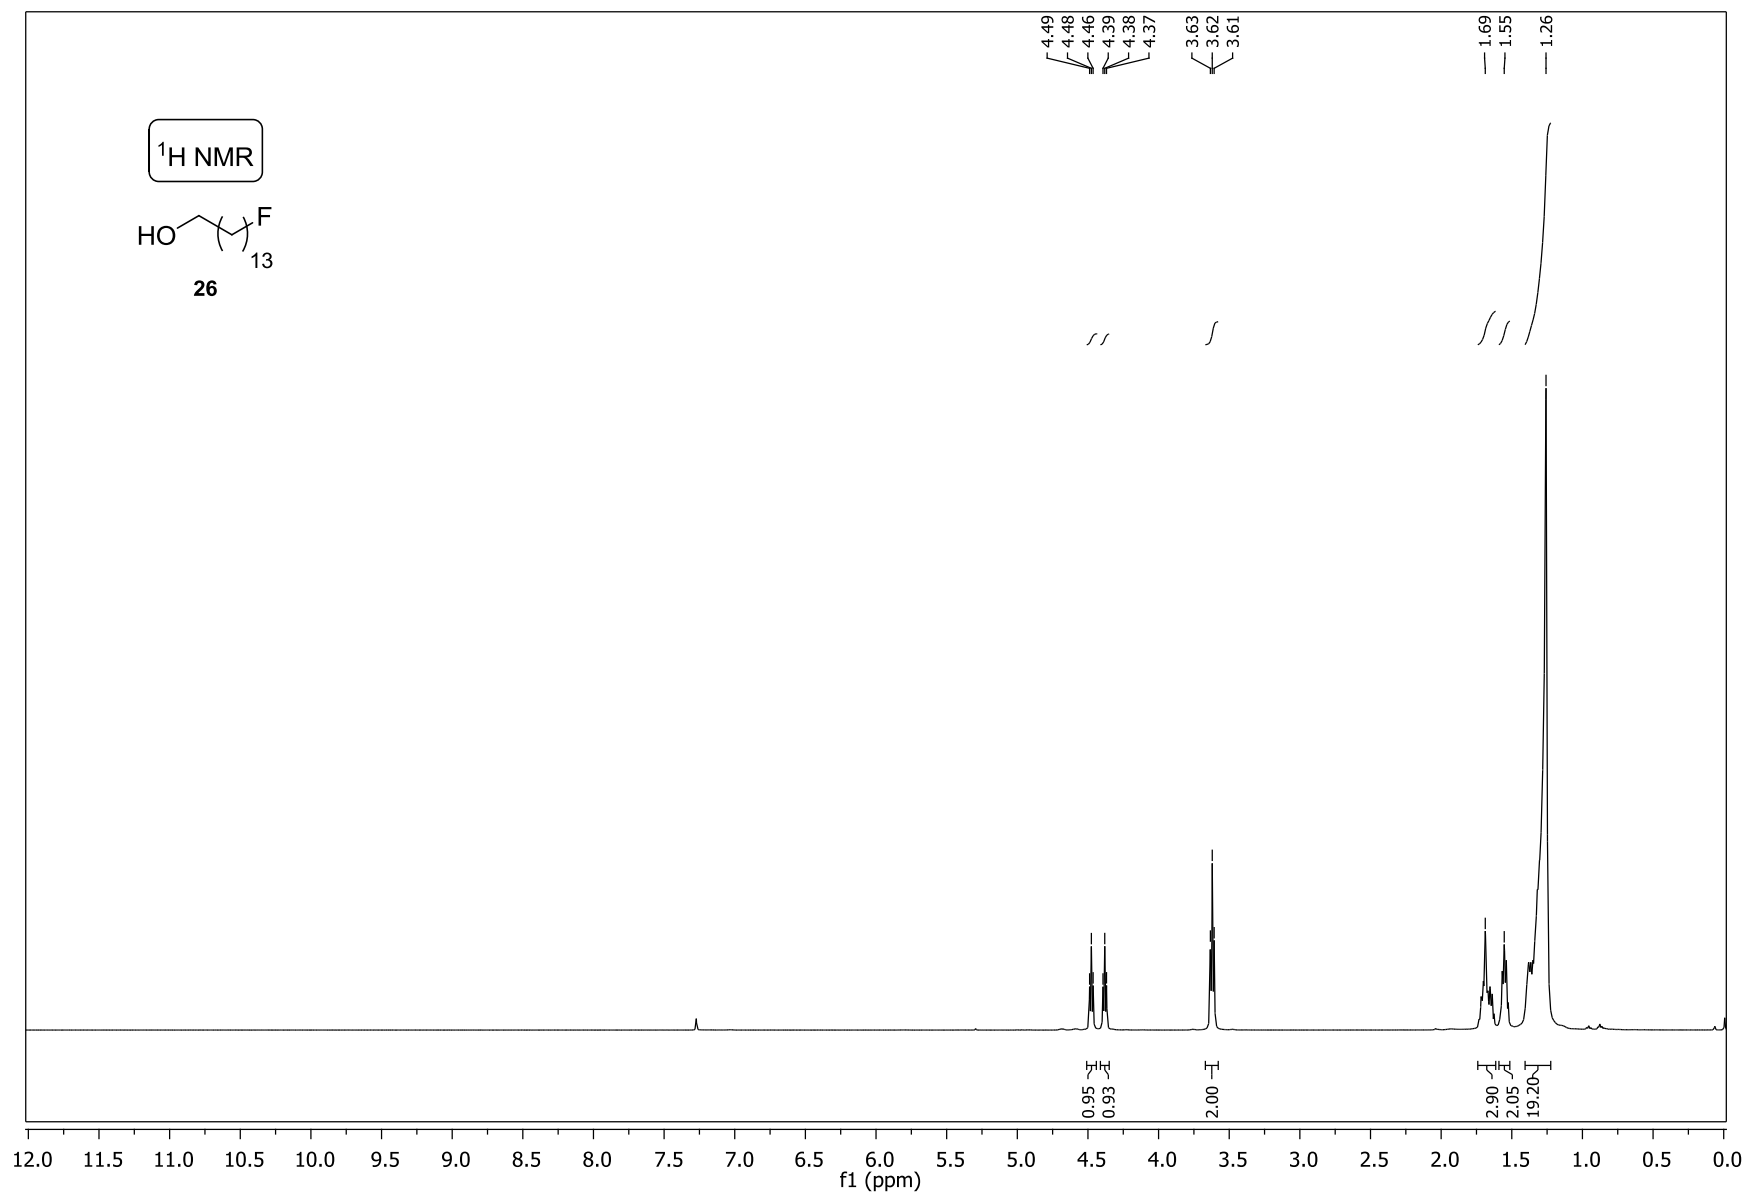

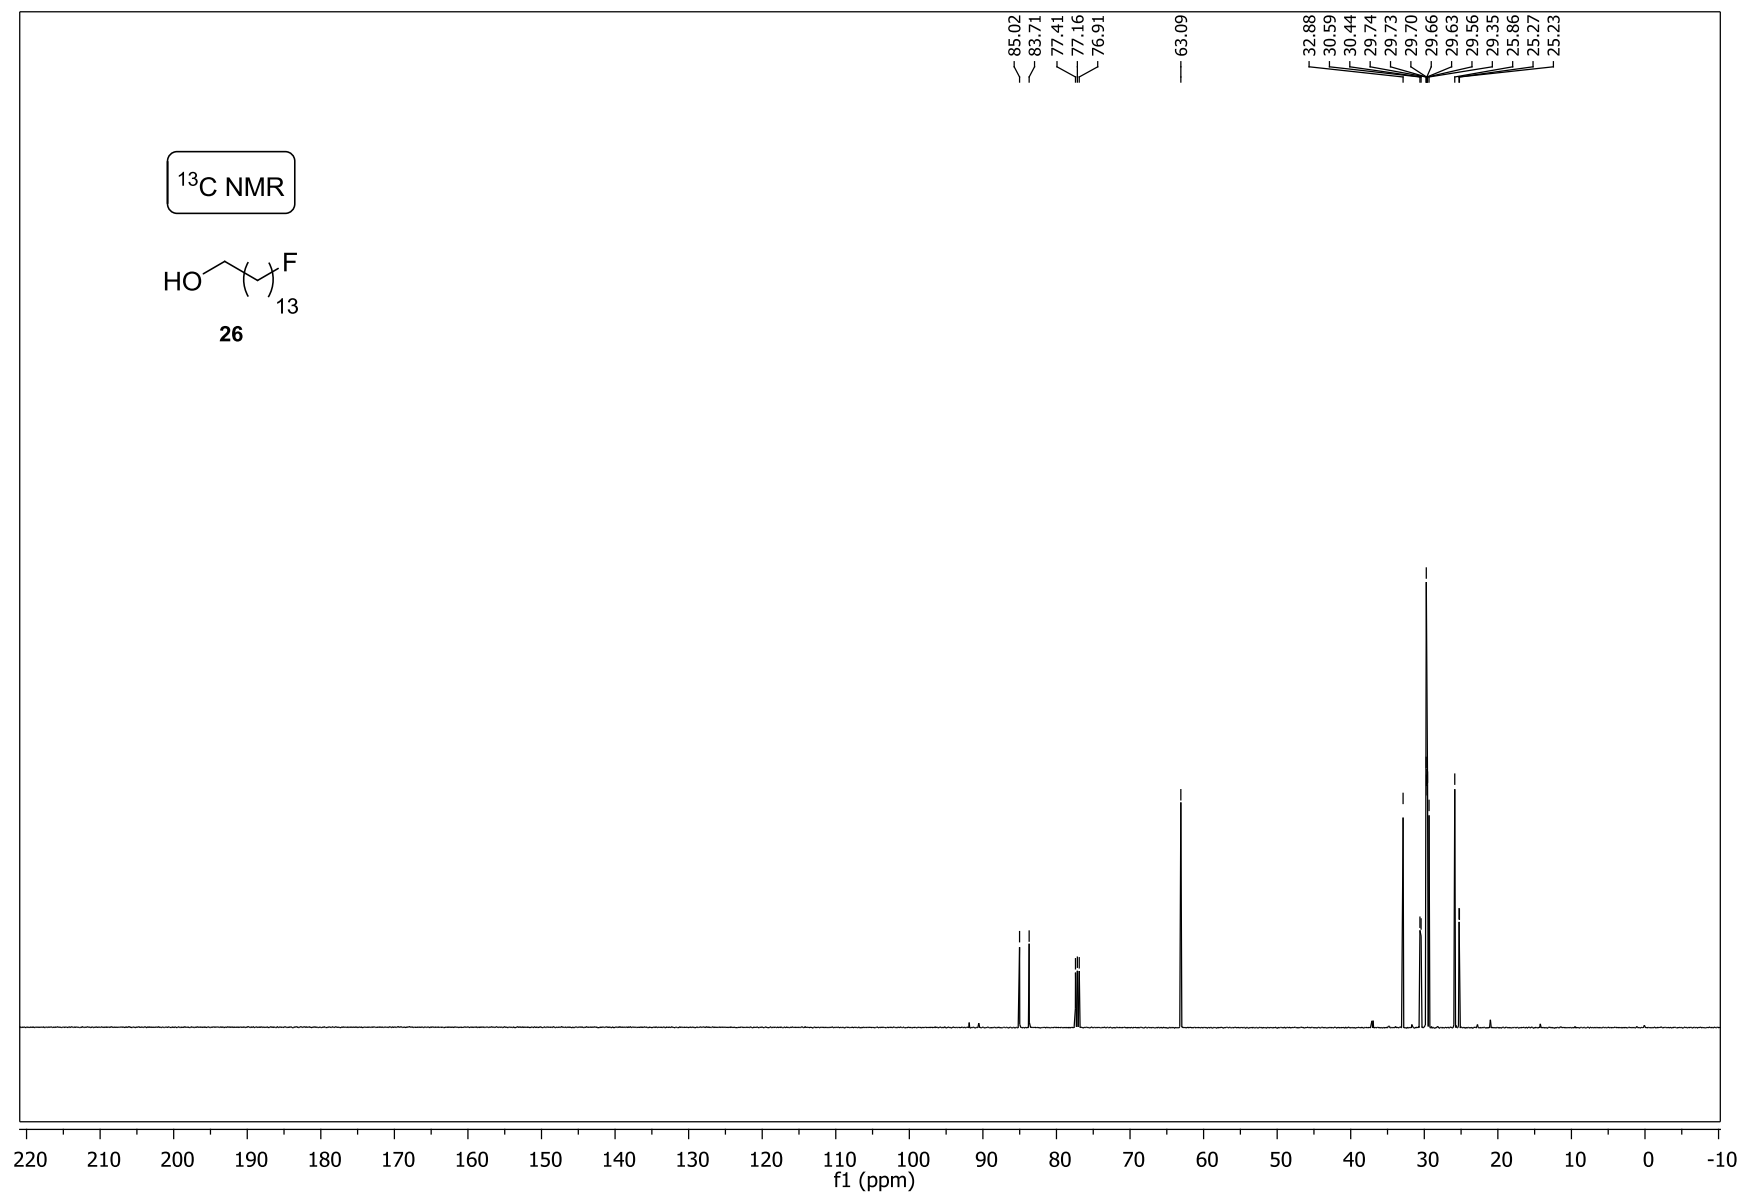





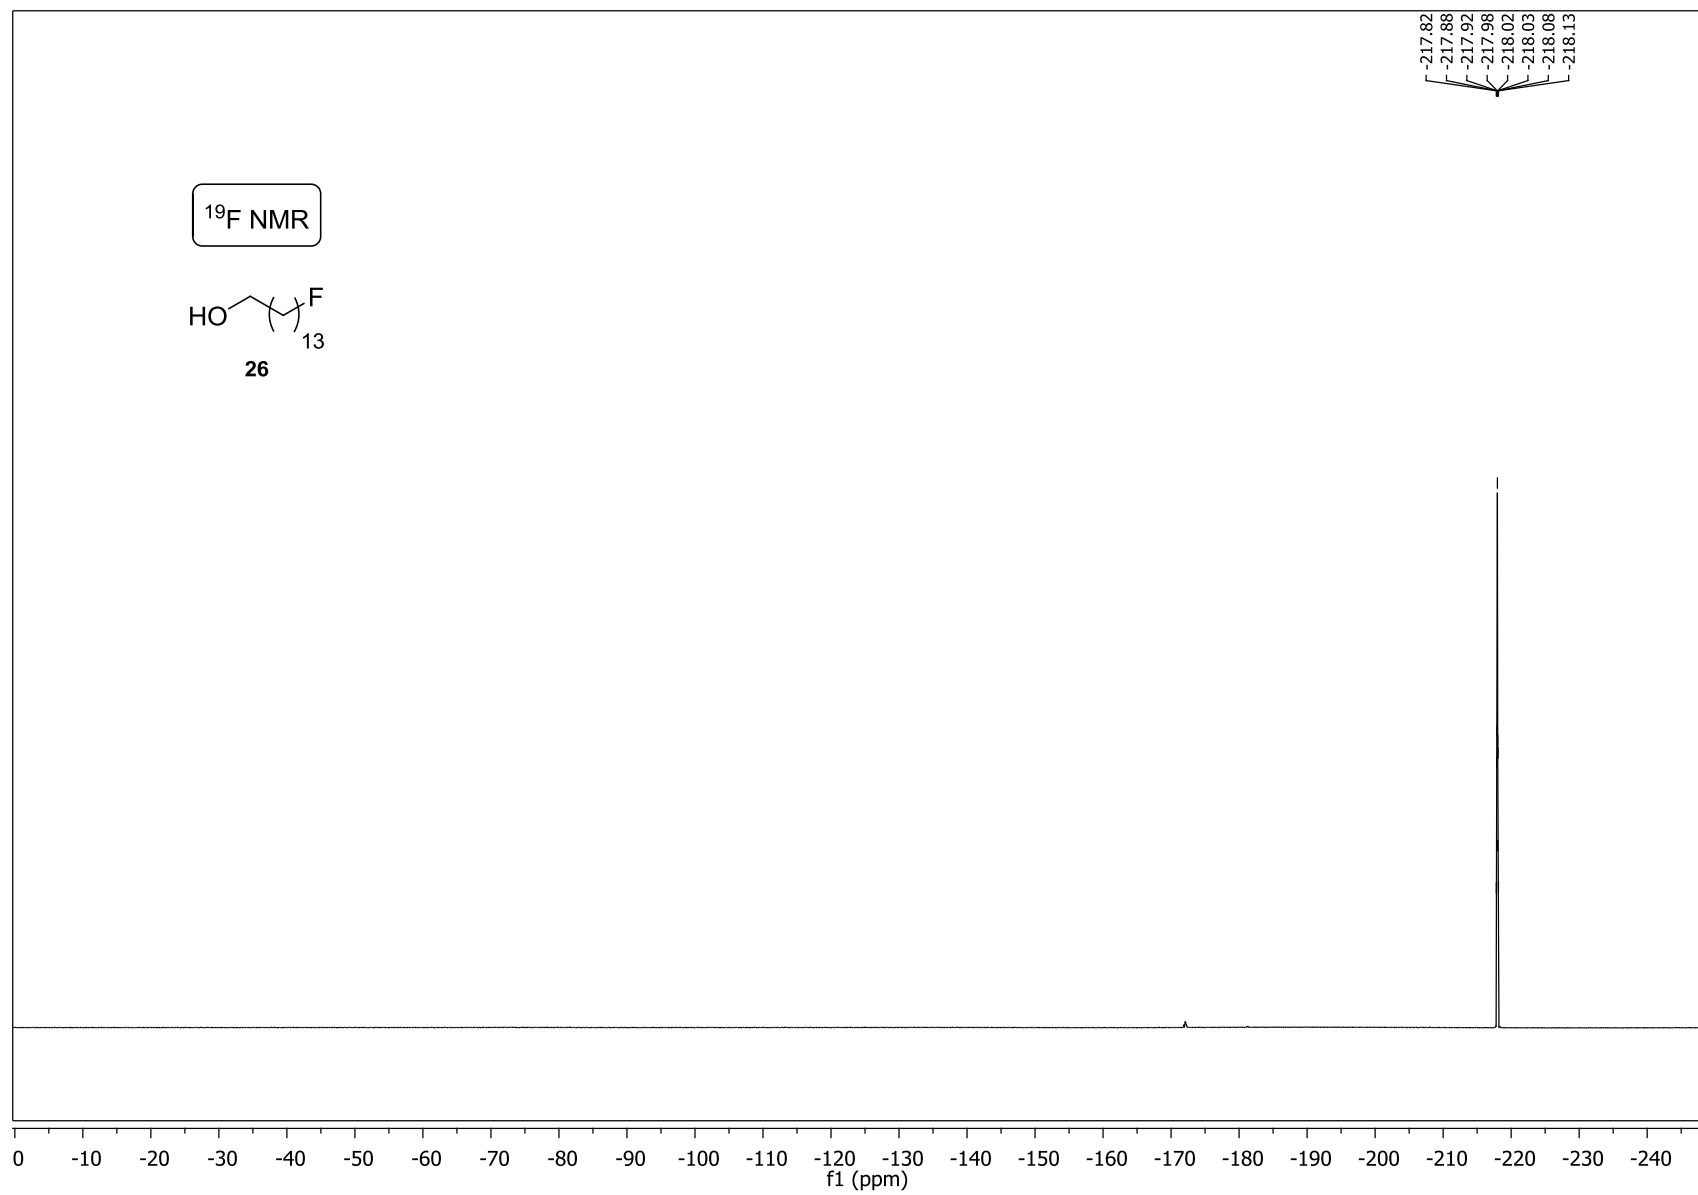



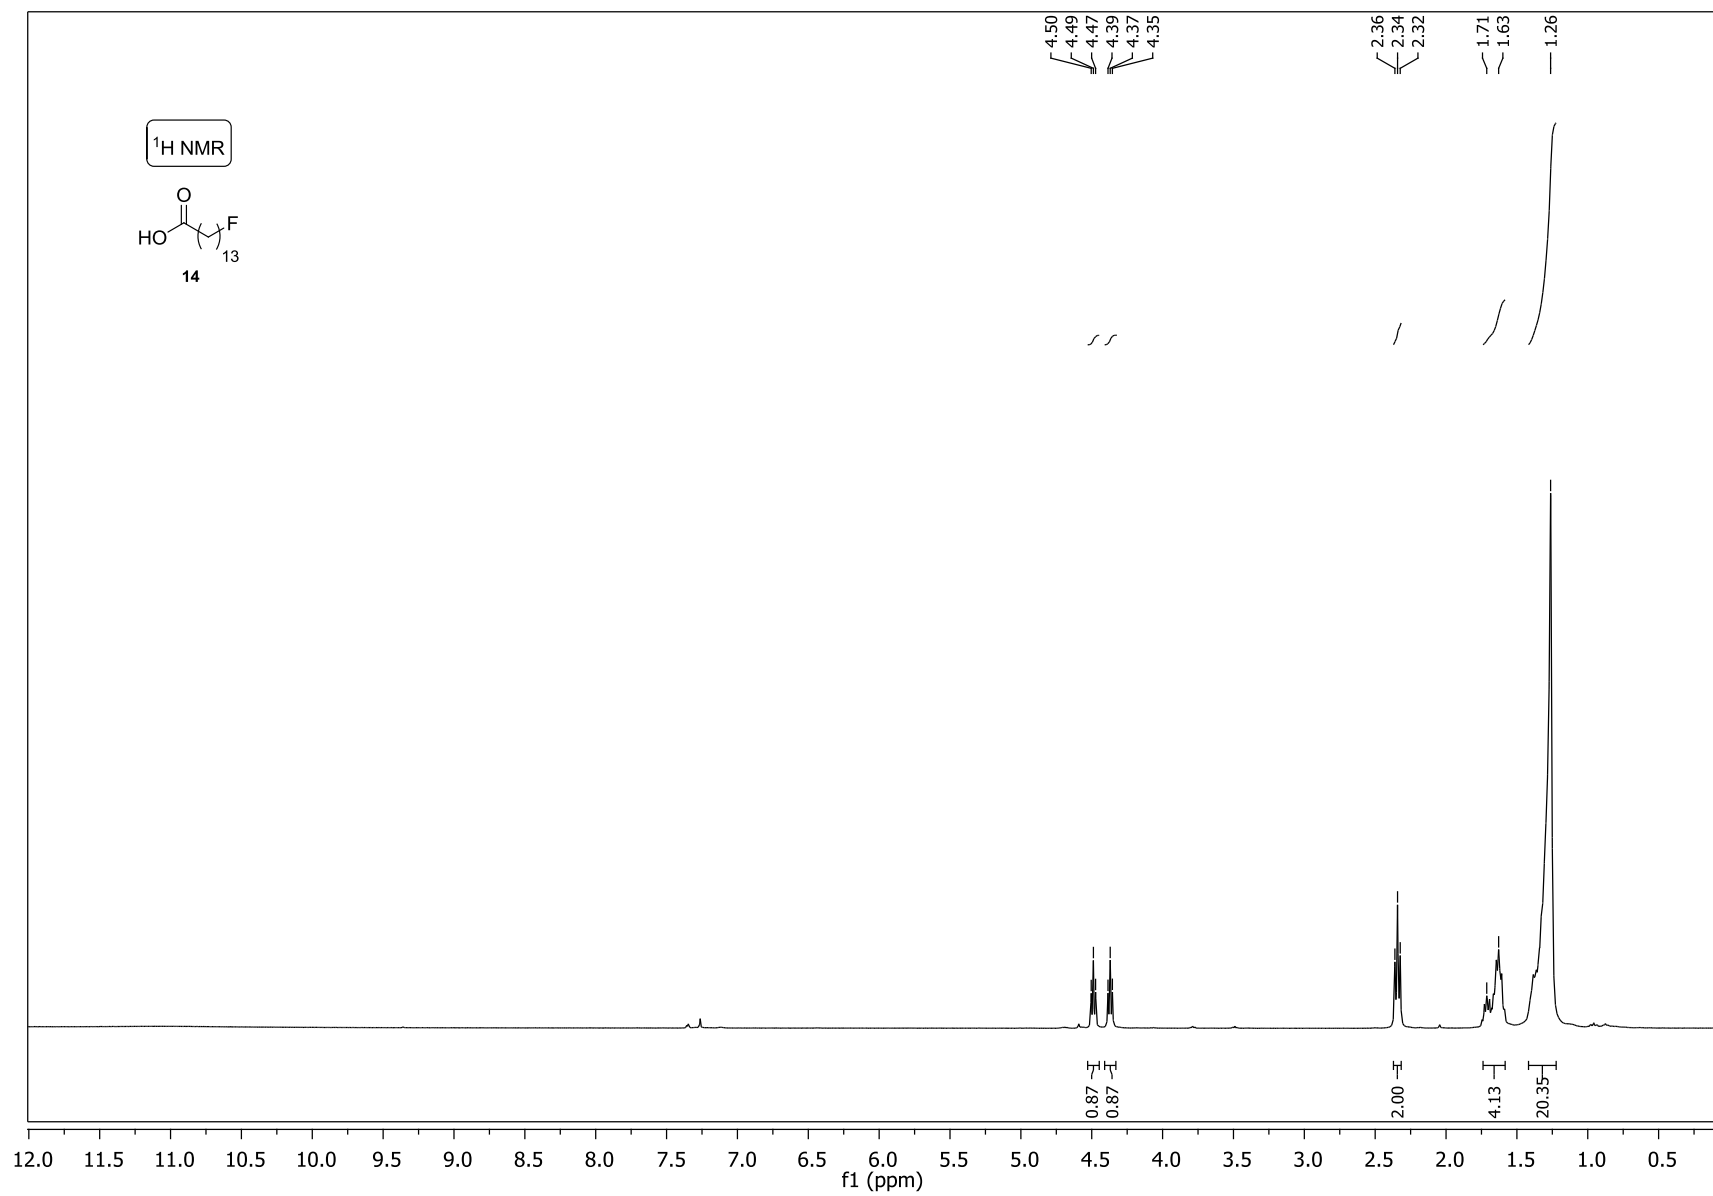



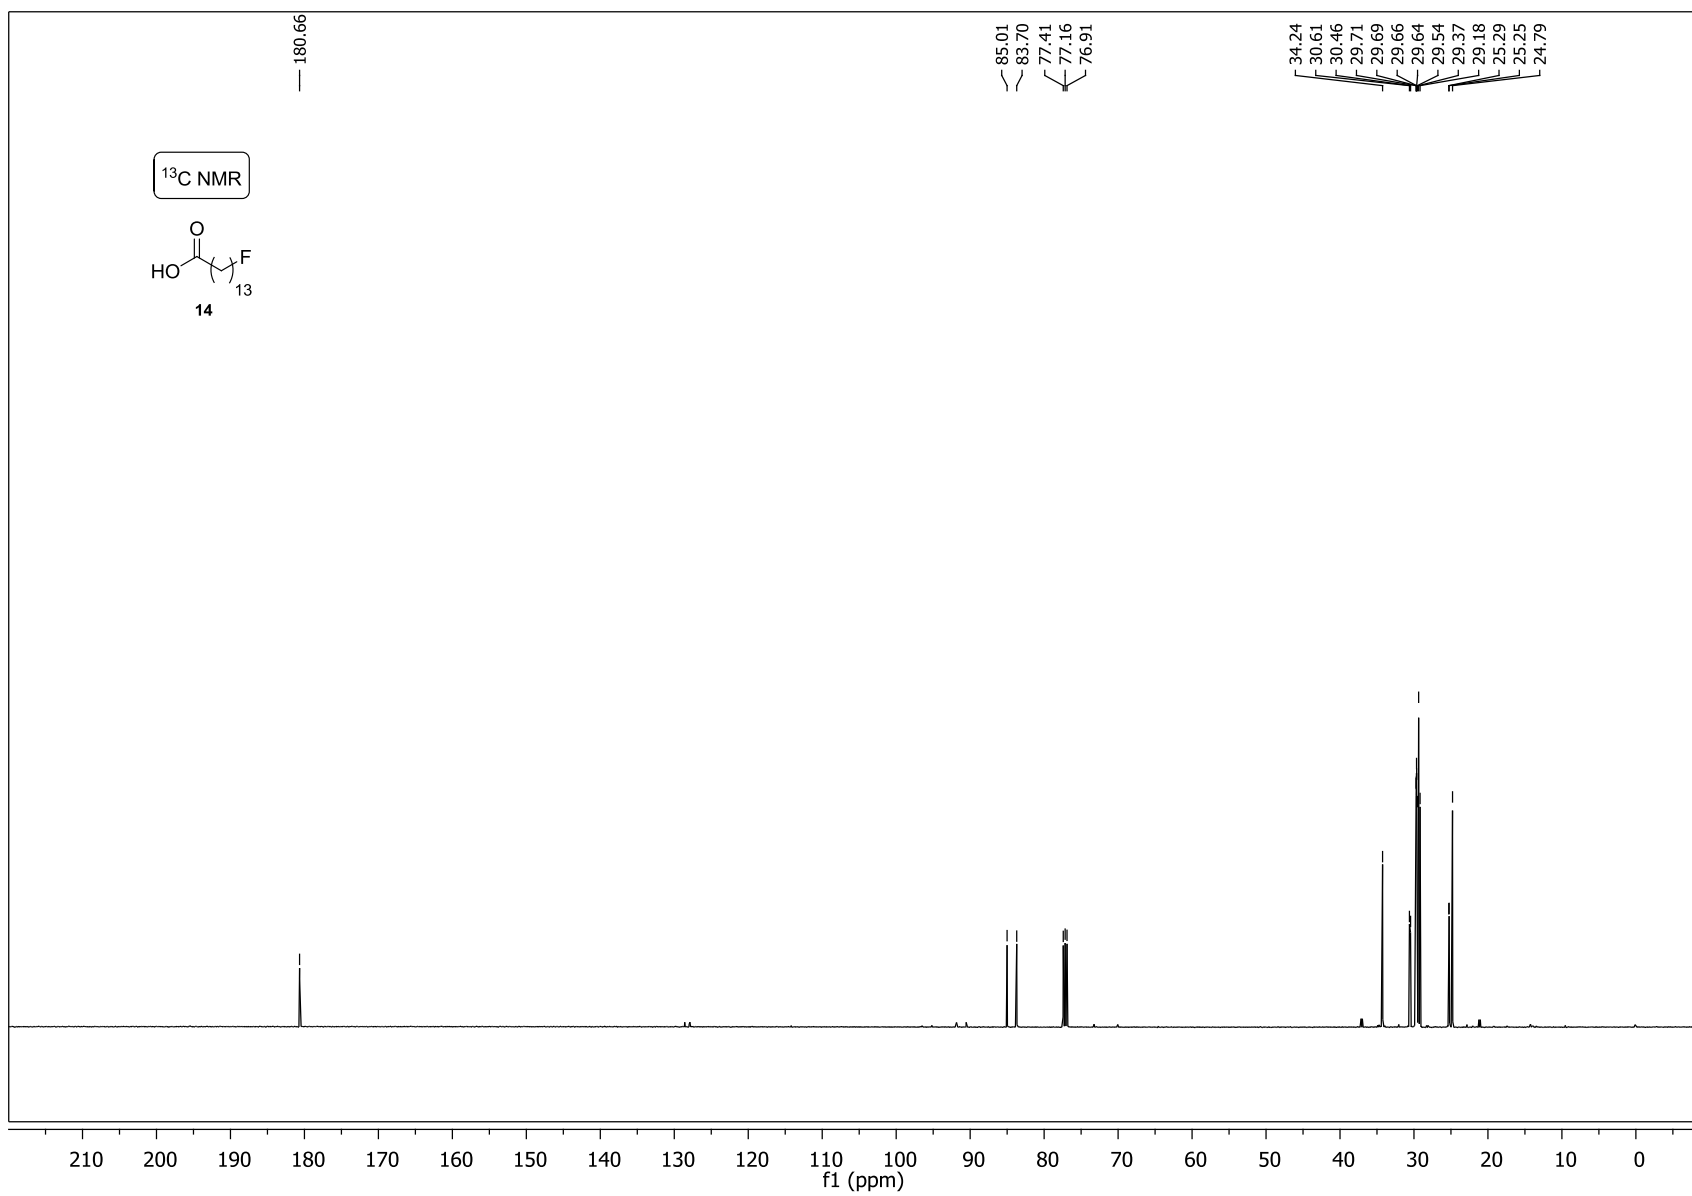



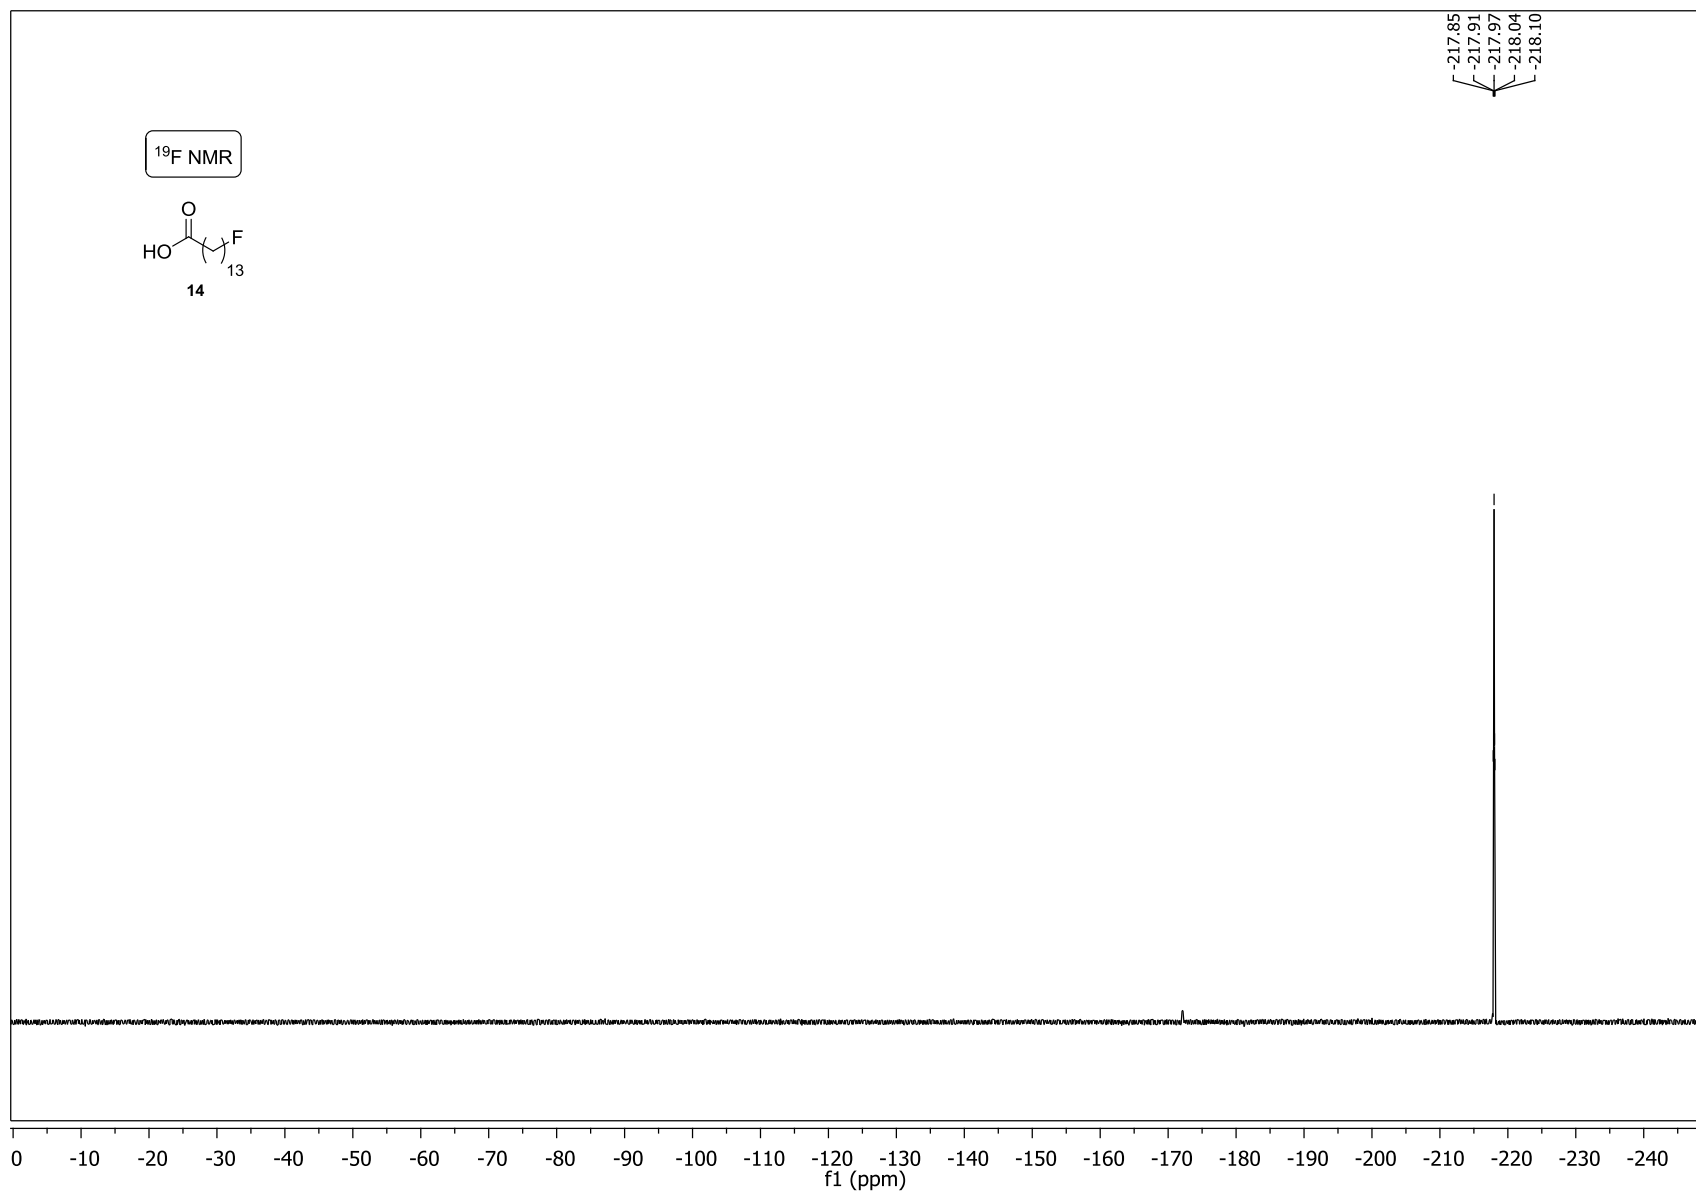



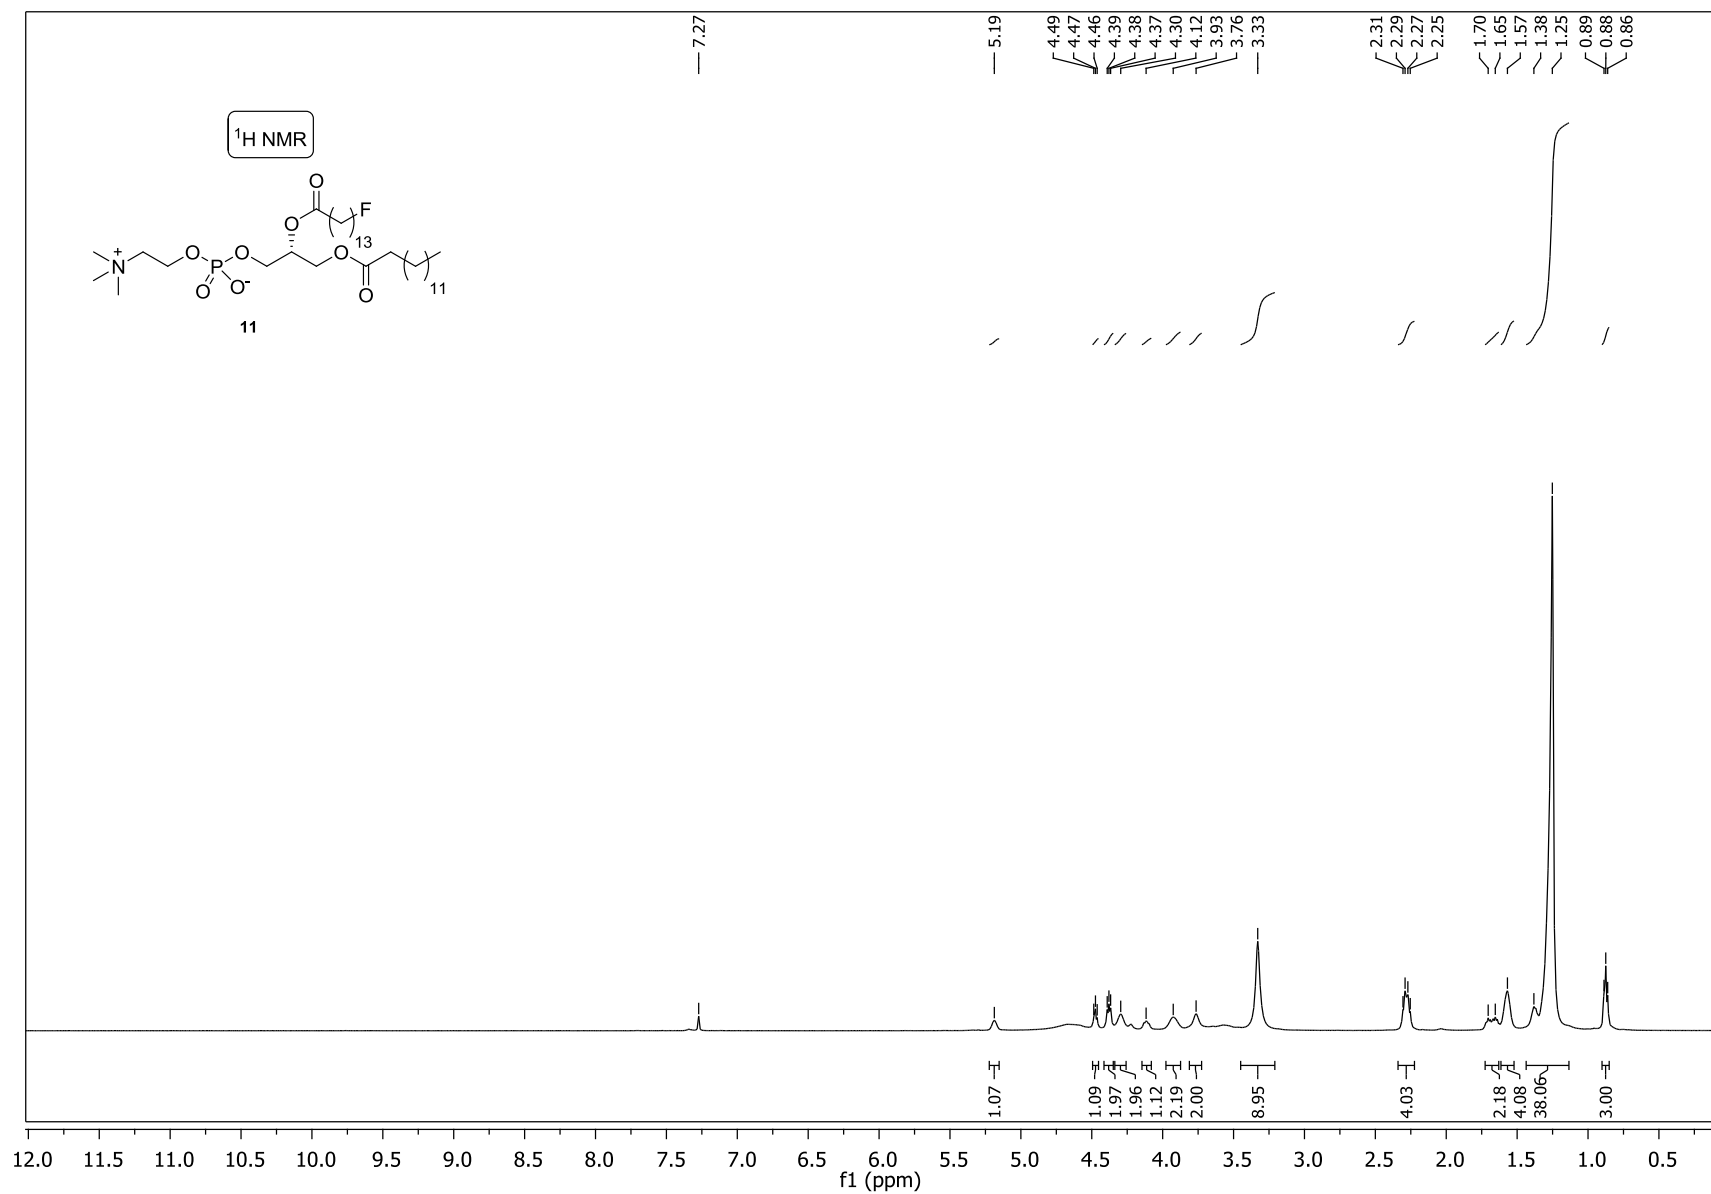



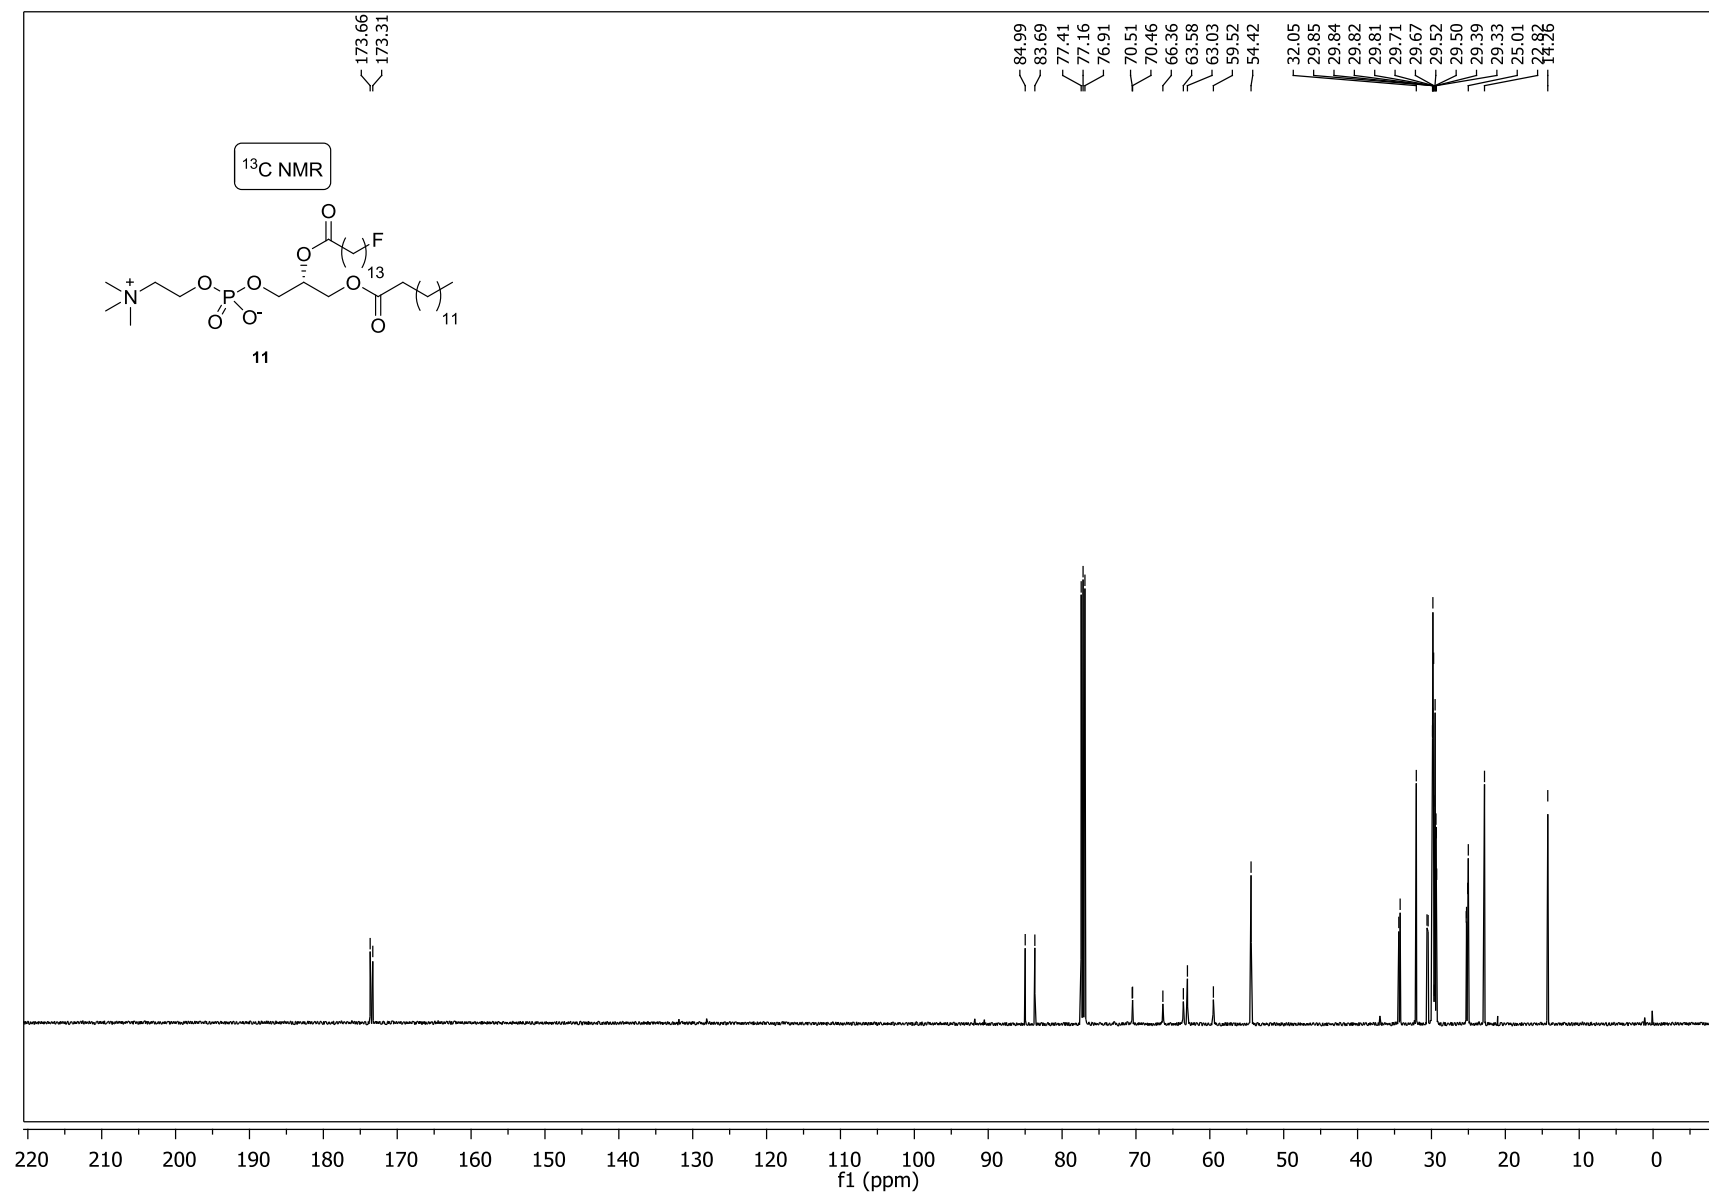



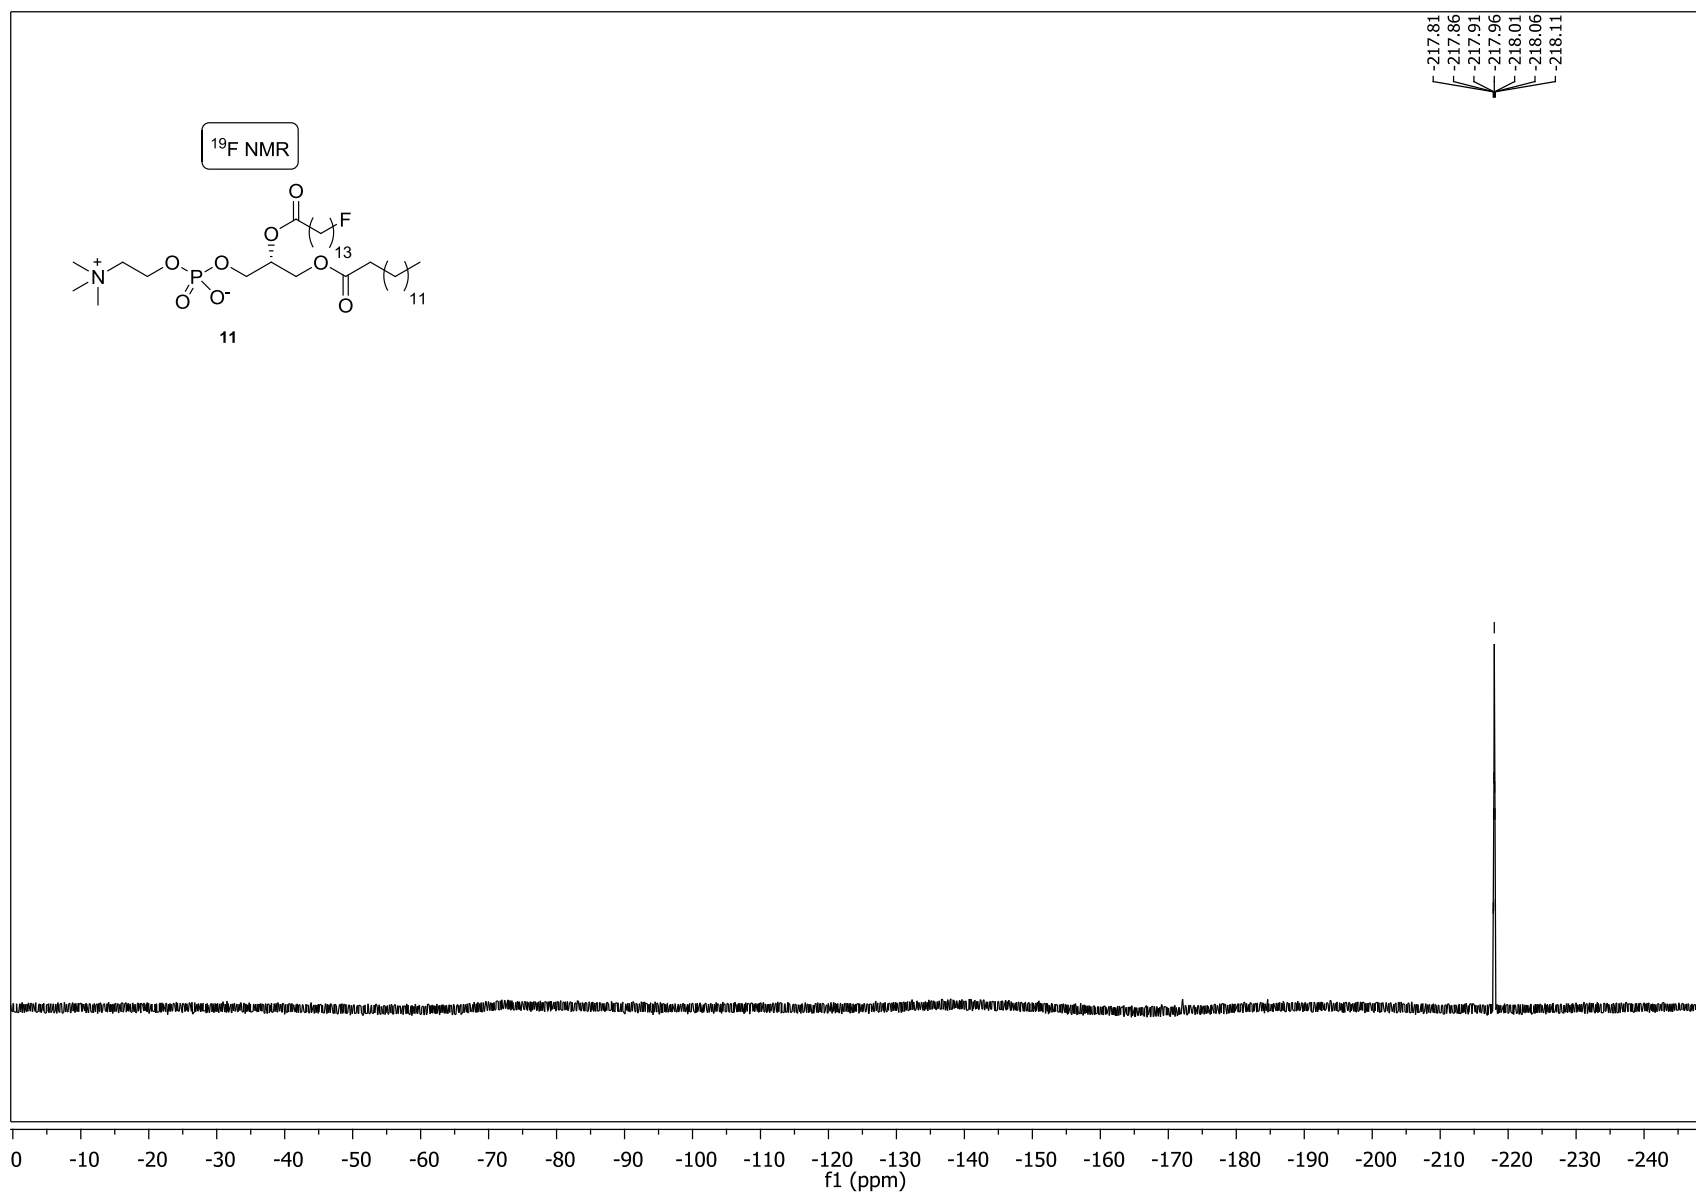

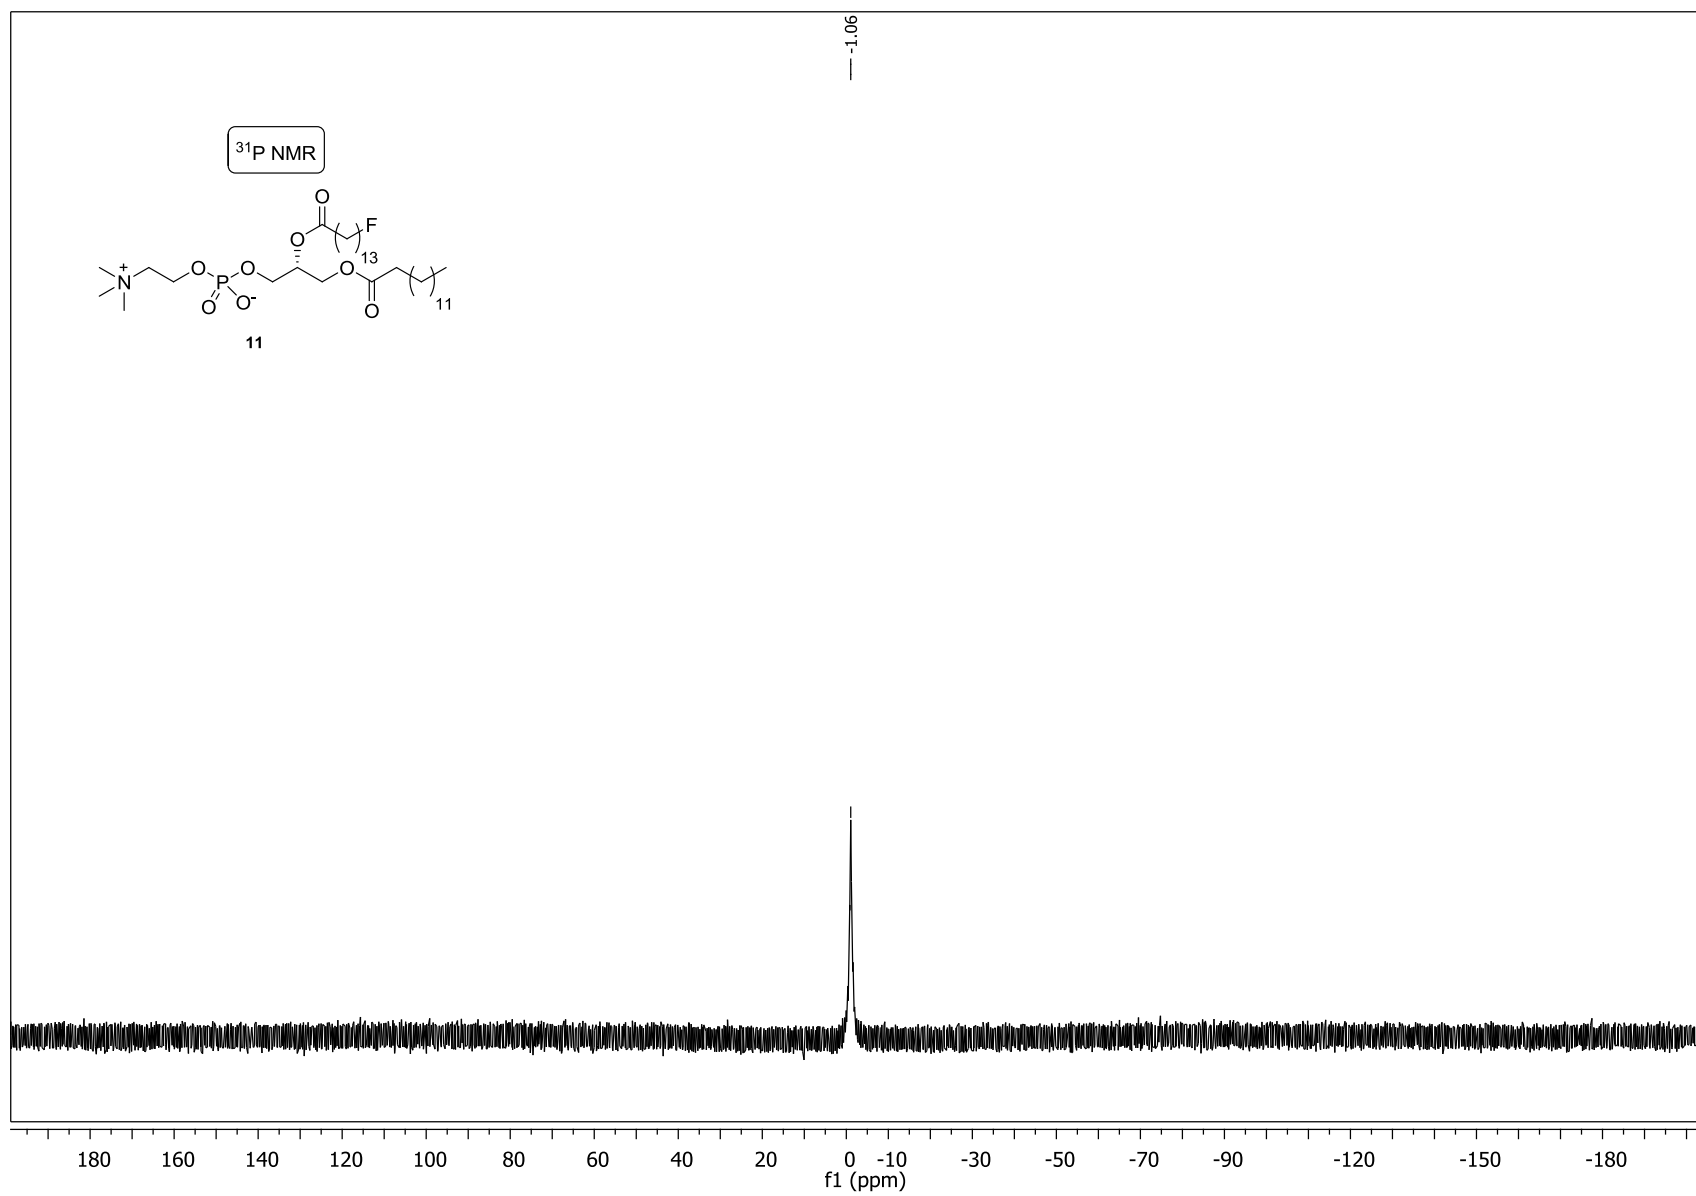



## Fourier-transformed Infrared

### *Sample preparation*

The fluorinated lipids were dissolved in chloroform at a concentration known precisely (the source of pure DMPC is also in a solution of chloroform, at a concentration of 25 mg/mL). The lipid multilamellar vesicles were prepared by measuring the necessary volume of the two lipids solutions (fluorinated DMPC and pure DMPC) and combining them before reducing the solvent volume with a stream of nitrogen or argon. The samples are placed in a lyophilizer for at least one night to remove all traces of residual organic solvent. A solution of deuterated water with 0.1 molar of HEPES buffer (2-[4-(2-hydroxyethyl)piperazin-1-yl]ethanesulfonic acid) is added to the samples to obtain a lipid concentration of 2% w/v. Then the samples underwent five thaw (heating 5 minutes at 50°C)/vortex shaking (10 seconds)/freezes (liquid N<sub>2</sub>) cycles. After the last cycle, the sample is allowed to cool to room temperature 5 minutes. Table 1 shows the different amounts of lipids and HEPES buffer used for the measurements.

**Table 1:** Necessary amounts of lipids and buffer for the preparation of FTIR samples

| Fluorinated lipid ratio (%) | Fluorinated lipid mass (mg) | Pure DMPC mass (mg) | HEPES buffer volume (μL) |
|-----------------------------|-----------------------------|---------------------|--------------------------|
| 100                         | 1,6                         | -                   | 40                       |
| 50                          | 0,8                         | 0.8                 | 40                       |
| 25                          | 0,4                         | 1.2                 | 40                       |
| 10                          | 0,2                         | 1.4                 | 50                       |
| 5                           | 0,2                         | 3.8                 | 100                      |
| 2,5                         | 0,2                         | 7.8                 | 200                      |

### *Experiments*

Infrared spectra were recorded with a Nicolet Magna 550 Fourier transform spectrometer (Thermo-Nicolet, Madison, WI, USA) equipped with a narrow band mercury–cadmium–telluride (MCT) detector and a germanium-coated KBr beam splitter. Ten microliters of the sample were placed between CaF<sub>2</sub> windows separated by a 6μm Mylar spacer. A total of 128 interferograms were acquired with a resolution of 2 cm<sup>-1</sup> in the spectral range of 4000–650 cm<sup>-1</sup> at various temperatures ranging from 10 to 70 °C and controlled by a home-made device. The spectra were



corrected for the water vapor and  $\text{CaF}_2$  contribution by subtraction of a reference spectrum. The data were processed with the software Grams 386 (Galactic Industries Corporation, Salem, MA, USA). The spectral is baseline-corrected using a cubic function. The methylene symmetric stretching frequency was obtained from the center of gravity calculated at the top 10% of the band. The informations obtained can then be transposed in graph using the Excel software (Microsoft, Redmond, WA). The transition temperatures and the cooperativity indices have been calculated from a custom algorithm in the Matlab program.

Figure 1 shows the type of spectra obtained with these experiments and describe the bands of interest; the  $\text{CH}_2$  stretching bands.

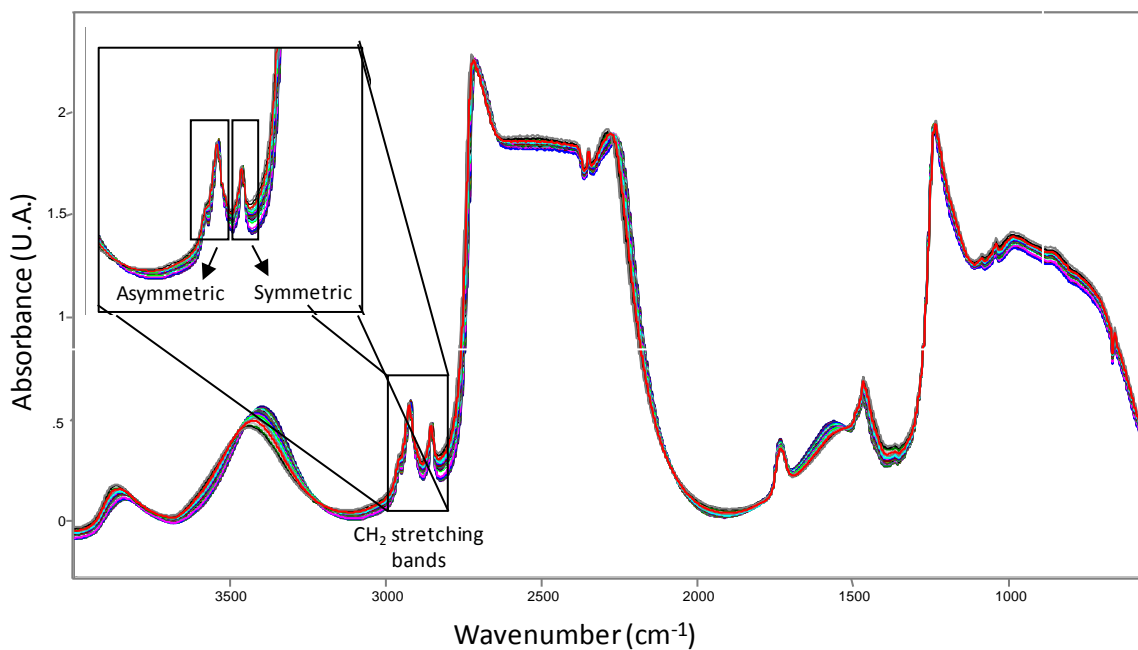

**Fig.1** FTIR spectra of 7F-DMPC (10 to 70 °C)
